# Supplementary material for: New Antibacterial Diterpenoids from the South China Sea Soft Coral <i>Klyxum molle</i>
Source: Preprints.org preprint supplement (doi:10.20944/preprints202305.1696.v1), 2023-05-24
Supplement: Supplementary file 1 [file supplementary]

## Supporting Information

### New Antibacterial Diterpenoids from the South China Sea Soft Coral

#### *Klyxum molle*

Jia-Dong Yu<sup>1,2</sup>, Dan-Dan Yu<sup>3</sup>, Ming-Zhi Su<sup>3</sup>, Yu-Cheng Gu<sup>4</sup>, Hong Wang<sup>1,\*</sup>, Yue-Wei Guo<sup>1,2,3,\*</sup>

<sup>1</sup> College of Pharmaceutical Science and Collaborative Innovation Center of Yangtze River Delta Region Green Pharmaceuticals, Zhejiang University of Technology, Hangzhou 310014, China

<sup>2</sup> State Key Laboratory of Drug Research, Shanghai Institute of Materia Medica, Chinese Academy of Sciences, Shanghai 201203, China

<sup>3</sup> Shandong Laboratory of Yantai Drug Discovery, Bohai Rim Advanced Research Institute for Drug Discovery, Yantai, Shandong 264117, China

<sup>4</sup> Syngenta, Jealott's Hill International Research Centre, Bracknell, Berkshire RG42 6EY, United Kingdom

\* Correspondence: hongw@zjut.edu.cn (H.W.); ywguo@simm.ac.cn (Y.-W.G.); Tel.: +86-21-50805813 (Y.-W.G.)

## Table of contents

- Figure S1.**  $^1\text{H}$  NMR spectrum of **1** (600MHz,  $\text{CDCl}_3$ )
- Figure S2.**  $^{13}\text{C}$  NMR spectrum of **1** (125 MHz,  $\text{CDCl}_3$ )
- Figure S3.** HSQC spectrum of **1** (600 MHz,  $\text{CDCl}_3$ )
- Figure S4.** HMBC spectrum of **1** (600 MHz,  $\text{CDCl}_3$ )
- Figure S5.**  $^1\text{H}$ - $^1\text{H}$  COSY spectrum of **1** (600 MHz,  $\text{CDCl}_3$ )
- Figure S6.** NOESY spectrum of **1** (600 MHz,  $\text{CDCl}_3$ )
- Figure S7.** HRESIMS spectrum of **1**
- Figure S8.** UV and CD spectrum of **1**
- Figure S9.** IR spectrum of **1**
- Figure S10.**  $^1\text{H}$  NMR spectrum of **2** (600MHz,  $\text{CDCl}_3$ )
- Figure S11.**  $^{13}\text{C}$  NMR spectrum of **2** (125 MHz,  $\text{CDCl}_3$ )
- Figure S12.** UV and CD spectrum of **2**
- Figure S13.**  $^1\text{H}$  NMR spectrum of **3** (600MHz,  $\text{CDCl}_3$ )
- Figure S14.**  $^{13}\text{C}$  NMR spectrum of **3** (125 MHz,  $\text{CDCl}_3$ )
- Figure S15.** UV and CD spectrum of **3**
- Figure S16.**  $^1\text{H}$  NMR spectrum of **4** (600MHz,  $\text{CDCl}_3$ )
- Figure S17.**  $^{13}\text{C}$  NMR spectrum of **4** (125 MHz,  $\text{CDCl}_3$ )
- Figure S18.**  $^1\text{H}$  NMR spectrum of **5** (600MHz,  $\text{CDCl}_3$ )
- Figure S19.**  $^{13}\text{C}$  NMR spectrum of **5** (125 MHz,  $\text{CDCl}_3$ )
- Figure S20.**  $^{13}\text{C}$  NMR spectrum for mixture of **4** and **5** (125 MHz,  $\text{CDCl}_3$ )
- Figure S21.** HSQC spectrum for mixture of **4** and **5** (600 MHz,  $\text{CDCl}_3$ )
- Figure S22.** HMBC spectrum for mixture of **4** and **5** (600 MHz,  $\text{CDCl}_3$ )
- Figure S23.**  $^1\text{H}$ - $^1\text{H}$  COSY spectrum for mixture of **4** and **5** (600 MHz,  $\text{CDCl}_3$ )
- Figure S24.** NOESY spectrum for mixture of **4** and **5** (600 MHz,  $\text{CDCl}_3$ )
- Figure S25.** HREIMS spectrum for mixture of **4** and **5**
- Figure S26.** UV and CD spectrum of **4**
- Figure S27.** UV and CD spectrum of **5**
- Figure S28.** IR spectrum for mixture of **4** and **5**
- Figure S29.**  $^1\text{H}$  NMR spectrum of **6** (600MHz,  $\text{CDCl}_3$ )
- Figure S30.**  $^{13}\text{C}$  NMR spectrum of **6** (125 MHz,  $\text{CDCl}_3$ )
- Figure S31.** HSQC spectrum of **6** (600 MHz,  $\text{CDCl}_3$ )
- Figure S32.** HMBC spectrum of **6** (600 MHz,  $\text{CDCl}_3$ )
- Figure S33.**  $^1\text{H}$ - $^1\text{H}$  COSY spectrum of **6** (600 MHz,  $\text{CDCl}_3$ )
- Figure S34.** NOESY spectrum of **6** (600 MHz,  $\text{CDCl}_3$ )
- Figure S35.** HRESIMS spectrum of **6**
- Figure S36.** UV and CD spectrum of **6**
- Figure S37.** IR spectrum of **6**
- Figure S38.**  $^1\text{H}$  NMR spectrum of **7** (600MHz,  $\text{CDCl}_3$ )
- Figure S39.**  $^{13}\text{C}$  NMR spectrum of **7** (125 MHz,  $\text{CDCl}_3$ )
- Figure S40.**  $^1\text{H}$  NMR spectrum of **8** (600MHz,  $\text{CDCl}_3$ )
- Figure S41.**  $^{13}\text{C}$  NMR spectrum of **8** (125 MHz,  $\text{CDCl}_3$ )
- Figure S42.**  $^{13}\text{C}$  NMR spectrum for mixture of **7** and **8** (125 MHz,  $\text{CDCl}_3$ )

**Figure S43.** HSQC spectrum for mixture of **7** and **8** (600 MHz, CDCl<sub>3</sub>)  
**Figure S44.** HMBC spectrum for mixture of **7** and **8** (600 MHz, CDCl<sub>3</sub>)  
**Figure S45.** <sup>1</sup>H–<sup>1</sup>H COSY spectrum for mixture of **7** and **8** (600 MHz, CDCl<sub>3</sub>)  
**Figure S46.** NOESY spectrum for mixture of **7** and **8** (600 MHz, CDCl<sub>3</sub>)  
**Figure S47.** HRESIMS spectrum for mixture of **7** and **8**  
**Figure S48.** UV and CD spectrum of **7**  
**Figure S49.** UV and CD spectrum of **8**  
**Figure S50.** IR spectrum for mixture of **7** and **8**  
**Figure S51.** <sup>1</sup>H NMR spectrum of **9** (600MHz, CDCl<sub>3</sub>)  
**Figure S52.** <sup>13</sup>C NMR spectrum of **9** (125 MHz, CDCl<sub>3</sub>)  
**Figure S53.** HSQC spectrum of **9** (600 MHz, CDCl<sub>3</sub>)  
**Figure S54.** HMBC spectrum of **9** (600 MHz, CDCl<sub>3</sub>)  
**Figure S55.** <sup>1</sup>H–<sup>1</sup>H COSY spectrum of **9** (600 MHz, CDCl<sub>3</sub>)  
**Figure S56.** NOESY spectrum of **9** (600 MHz, CDCl<sub>3</sub>)  
**Figure S57.** HREIMS spectrum of **9**  
**Figure S58.** IR spectrum of **9**  
**Figure S59.** <sup>1</sup>H NMR spectrum of **10** (600MHz, CDCl<sub>3</sub>)  
**Figure S60.** <sup>13</sup>C NMR spectrum of **10** (125 MHz, CDCl<sub>3</sub>)  
**Figure S61.** HSQC spectrum of **10** (600 MHz, CDCl<sub>3</sub>)  
**Figure S62.** HMBC spectrum of **10** (600 MHz, CDCl<sub>3</sub>)  
**Figure S63.** <sup>1</sup>H–<sup>1</sup>H COSY spectrum of **10** (600 MHz, CDCl<sub>3</sub>)  
**Figure S64.** NOESY spectrum of **10** (600 MHz, CDCl<sub>3</sub>)  
**Figure S65.** HRESIMS spectrum of **10**  
**Figure S66.** IR spectrum of **10**  
**Figure S67.** <sup>1</sup>H NMR spectrum of **11** (600MHz, CDCl<sub>3</sub>)  
**Figure S68.** <sup>13</sup>C NMR spectrum of **11** (125 MHz, CDCl<sub>3</sub>)  
**Figure S69.** HSQC spectrum of **11** (600 MHz, CDCl<sub>3</sub>)  
**Figure S70.** HMBC spectrum of **11** (600 MHz, CDCl<sub>3</sub>)  
**Figure S71.** <sup>1</sup>H–<sup>1</sup>H COSY spectrum of **11** (600 MHz, CDCl<sub>3</sub>)  
**Figure S72.** NOESY spectrum of **11** (600 MHz, CDCl<sub>3</sub>)  
**Figure S73.** HREIMS spectrum of **11**  
**Figure S74.** UV and CD spectrum of **11**  
**Figure S75.** IR spectrum of **11**  
**Figure S76.** <sup>1</sup>H NMR spectrum of **12** (600MHz, CDCl<sub>3</sub>)  
**Figure S77.** <sup>13</sup>C NMR spectrum of **12** (125 MHz, CDCl<sub>3</sub>)  
**Figure S78.** HSQC spectrum of **12** (600 MHz, CDCl<sub>3</sub>)  
**Figure S79.** HMBC spectrum of **12** (600 MHz, CDCl<sub>3</sub>)  
**Figure S80.** <sup>1</sup>H–<sup>1</sup>H COSY spectrum of **12** (600 MHz, CDCl<sub>3</sub>)  
**Figure S81.** NOESY spectrum of **12** (600 MHz, CDCl<sub>3</sub>)  
**Figure S82.** HREIMS spectrum of **12**  
**Figure S83.** UV and CD spectrum of **12**  
**Figure S84.** IR spectrum of **12**  
**Figure S85.** <sup>1</sup>H NMR spectrum of **13** (600MHz, CDCl<sub>3</sub>)  
**Figure S86.** <sup>13</sup>C NMR spectrum of **13** (125 MHz, CDCl<sub>3</sub>)

**Figure S87.** HSQC spectrum of **13** (600 MHz, CDCl<sub>3</sub>)

**Figure S88.** HMBC spectrum of **13** (600 MHz, CDCl<sub>3</sub>)

**Figure S89.** <sup>1</sup>H–<sup>1</sup>H COSY spectrum of **13** (600 MHz, CDCl<sub>3</sub>)

**Figure S90.** NOESY spectrum of **13** (600 MHz, CDCl<sub>3</sub>)

**Figure S91.** HREIMS spectrum of **13**

**Figure S92.** IR spectrum of **13**

**Figure S93.** <sup>1</sup>H NMR spectrum of **14** (600MHz, CDCl<sub>3</sub>)

**Figure S94.** <sup>13</sup>C NMR spectrum of **14** (125 MHz, CDCl<sub>3</sub>)

**Figure S95.** HSQC spectrum of **14** (600 MHz, CDCl<sub>3</sub>)

**Figure S96.** HMBC spectrum of **14** (600 MHz, CDCl<sub>3</sub>)

**Figure S97.** <sup>1</sup>H–<sup>1</sup>H COSY spectrum of **14** (600 MHz, CDCl<sub>3</sub>)

**Figure S98.** NOESY spectrum of **14** (600 MHz, CDCl<sub>3</sub>)

**Figure S99.** HREIMS spectrum of **14**

**Figure S100.** UV and CD spectrum of **14**

**Figure S101.** IR spectrum of **14**

**Figure S102.** <sup>1</sup>H NMR spectrum of **15** (600MHz, CDCl<sub>3</sub>)

**Figure S103.** <sup>13</sup>C NMR spectrum of **15** (125 MHz, CDCl<sub>3</sub>)

**Figure S104.** HSQC spectrum of **15** (600 MHz, CDCl<sub>3</sub>)

**Figure S105.** HMBC spectrum of **15** (600 MHz, CDCl<sub>3</sub>)

**Figure S106.** <sup>1</sup>H–<sup>1</sup>H COSY spectrum of **15** (600 MHz, CDCl<sub>3</sub>)

**Figure S107.** NOESY spectrum of **15** (600 MHz, CDCl<sub>3</sub>)

**Figure S108.** HREIMS spectrum of **15**

**Figure S109.** UV and CD spectrum of **15**

**Figure S110.** IR spectrum of **15**

**Figure S111.** Structure of studied isomers of compound **9**

**Figure S112.** Averaged isotropic magnetic shielding constants ( $\sigma$ ) of studied isomers and experimental <sup>1</sup>H and <sup>13</sup>C data of **9**

**Figure S113.** DP4+ results obtained using experimental <sup>1</sup>H and <sup>13</sup>C data of compound **9** versus isomers **9a** and **9b**

**Figure S114.** Structure of studied isomers of compound **10**

**Figure S115.** Averaged isotropic magnetic shielding constants ( $\sigma$ ) of studied isomers and experimental <sup>1</sup>H and <sup>13</sup>C data of **10**

**Figure S116.** DP4+ results obtained using experimental <sup>1</sup>H and <sup>13</sup>C data of compound **10** versus isomers **10a**, **10b**, **10c**, **10d**

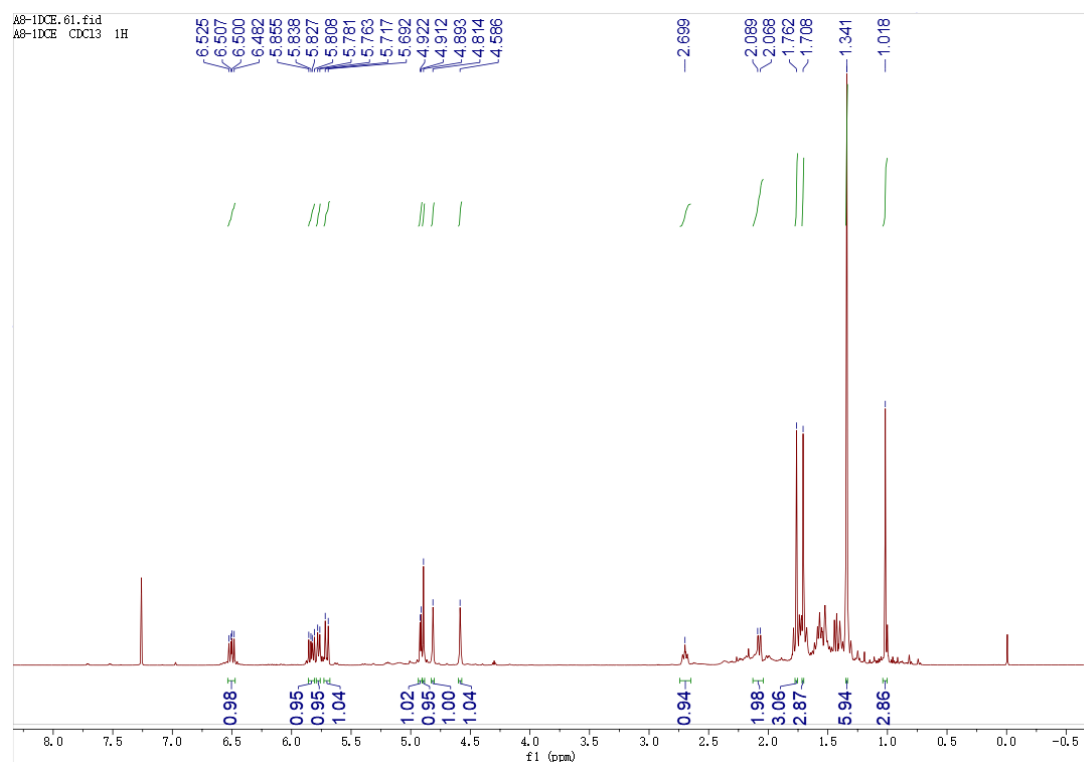

**Figure S1.**  $^1\text{H}$  NMR spectrum of **1** (600MHz,  $\text{CDCl}_3$ )

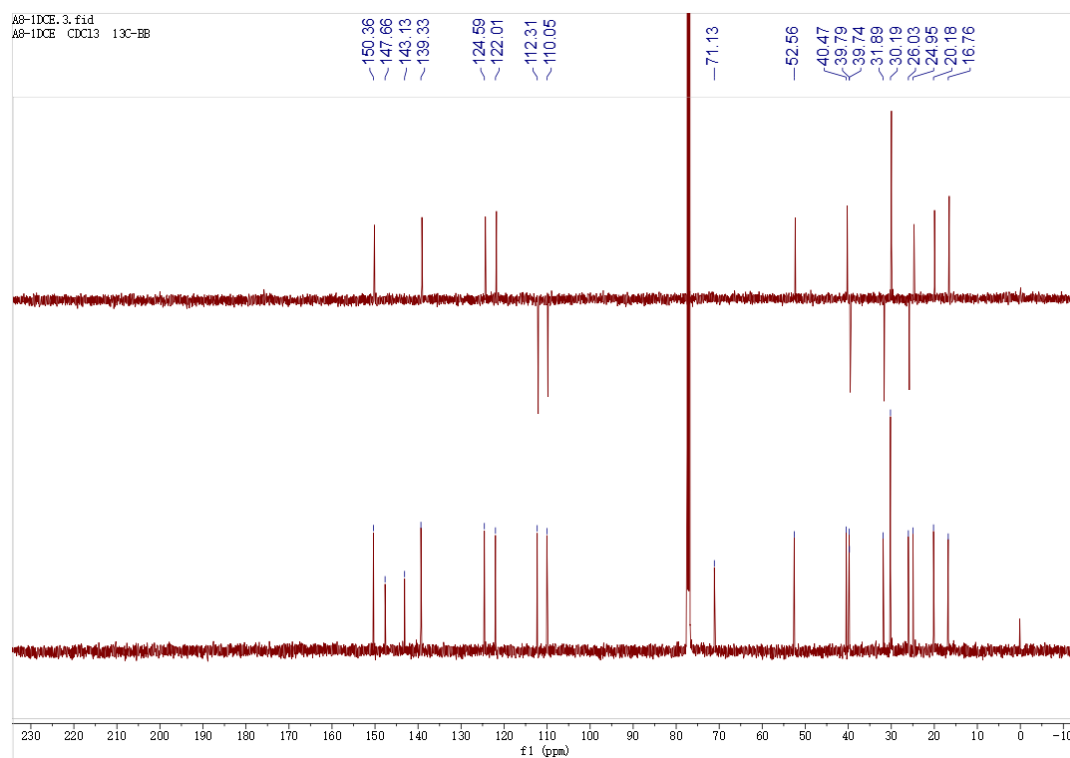

**Figure S2.**  $^{13}\text{C}$  NMR spectrum of **1** (125 MHz,  $\text{CDCl}_3$ )

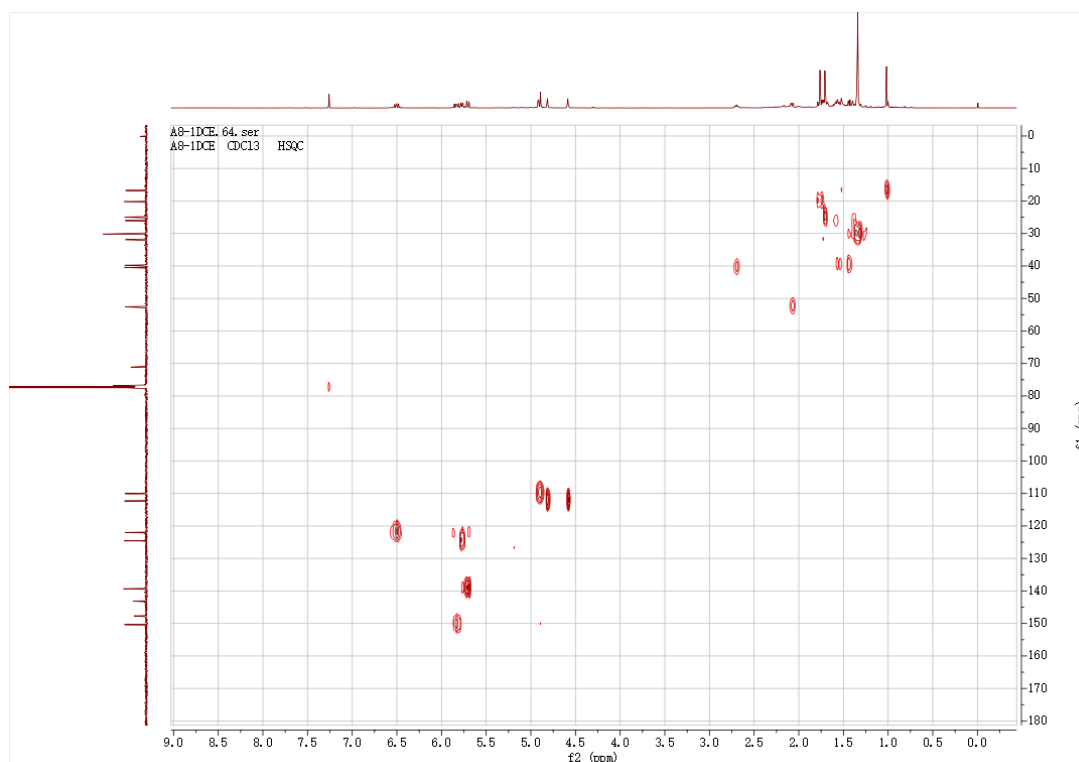

**Figure S3.** HSQC spectrum of **1** (600 MHz, CDCl<sub>3</sub>)

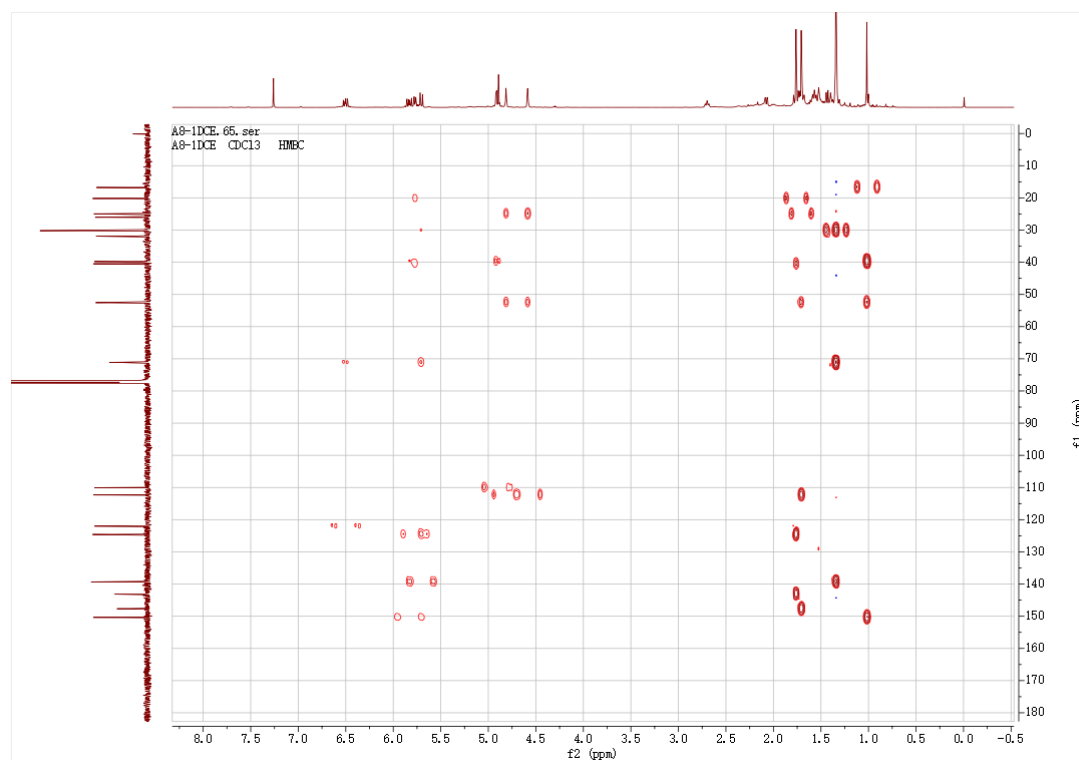

**Figure S4.** HMBC spectrum of **1** (600 MHz, CDCl<sub>3</sub>)

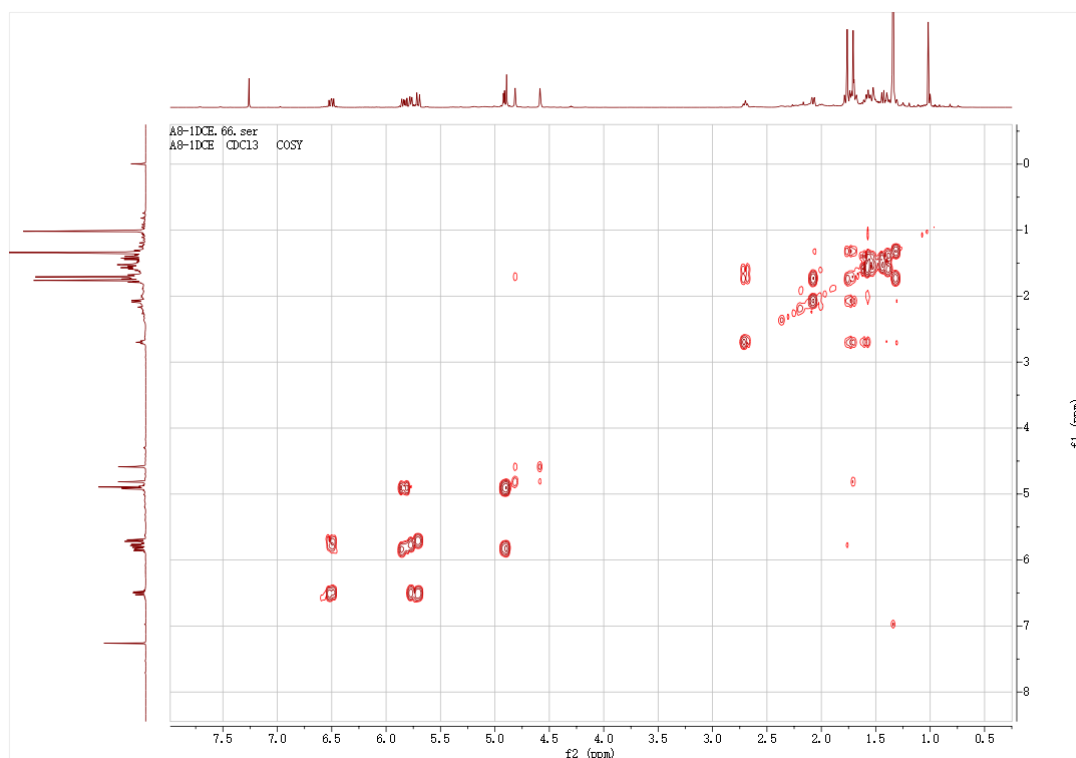

**Figure S5.** <sup>1</sup>H-<sup>1</sup>H COSY spectrum of **1** (600 MHz, CDCl<sub>3</sub>)

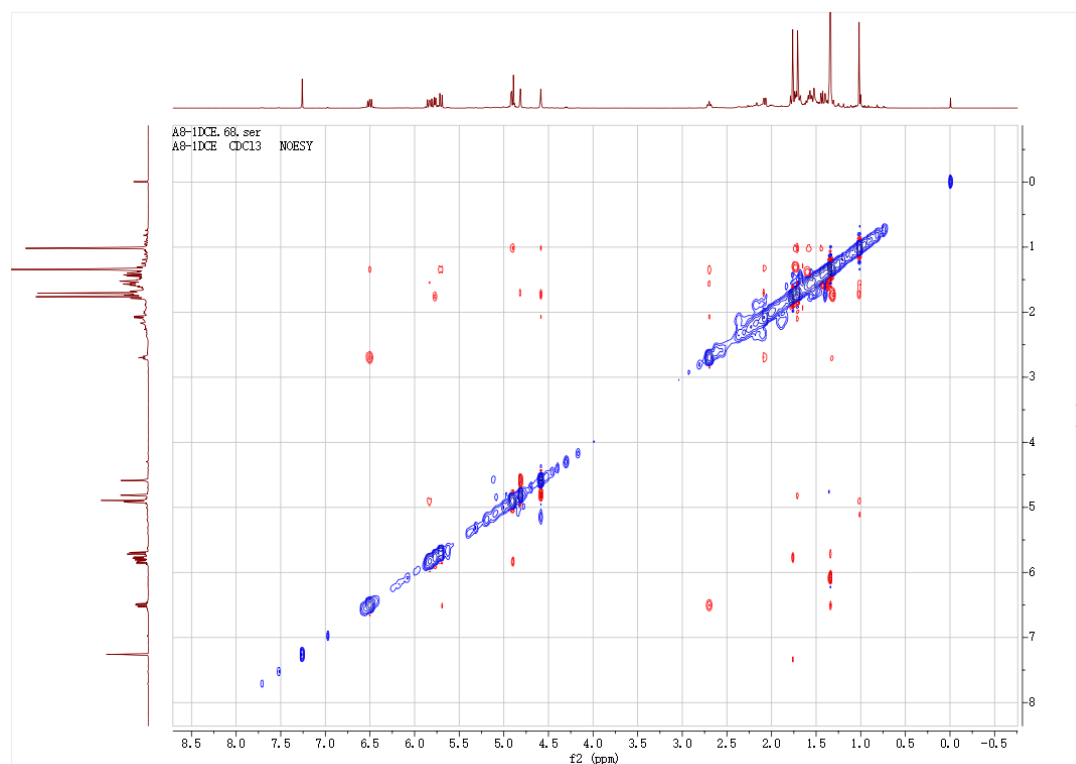

**Figure S6.** NOESY spectrum of **1** (600 MHz, CDCl<sub>3</sub>)

## Qualitative Analysis Report

|                        |                                        |                               |                             |
|------------------------|----------------------------------------|-------------------------------|-----------------------------|
| <b>Data Filename</b>   | ESI202103095.d                         | <b>Sample Name</b>            | A8-1DCE                     |
| <b>Sample ID</b>       |                                        | <b>Position</b>               | P2-A3                       |
| <b>Instrument Name</b> | Agilent G6520 Q-TOF                    | <b>Acq Method</b>             | 20160322_MS_ESIH_POS_1min.m |
| <b>Acquired Time</b>   | 6/18/2021 16:27:43                     | <b>IRM Calibration Status</b> | Success                     |
| <b>DA Method</b>       | small molecular data analysis method.m | <b>Comment</b>                | ESIH by zhuzhenyun          |

### User Spectra

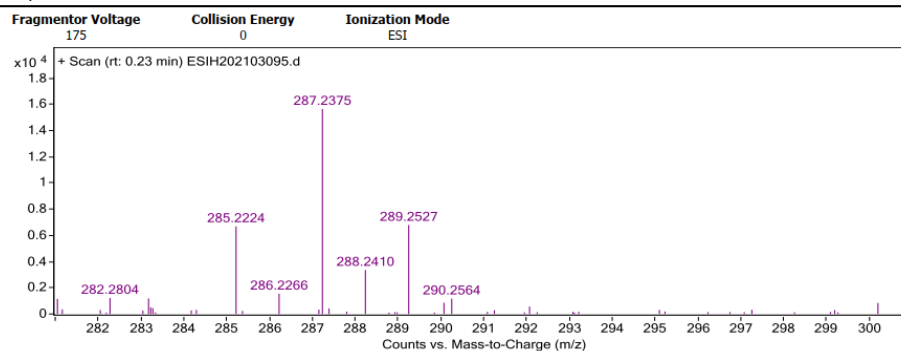

### Formula Calculator Results

| m/z      | Calc m/z | Diff (mDa) | Diff (ppm) | Ion Formula | Ion    |
|----------|----------|------------|------------|-------------|--------|
| 289.2527 | 289.2526 | -0.07      | -0.24      | C20 H33 O   | (M+H)+ |

--- End Of Report ---

**Figure S7. HRESIMS spectrum of 1**

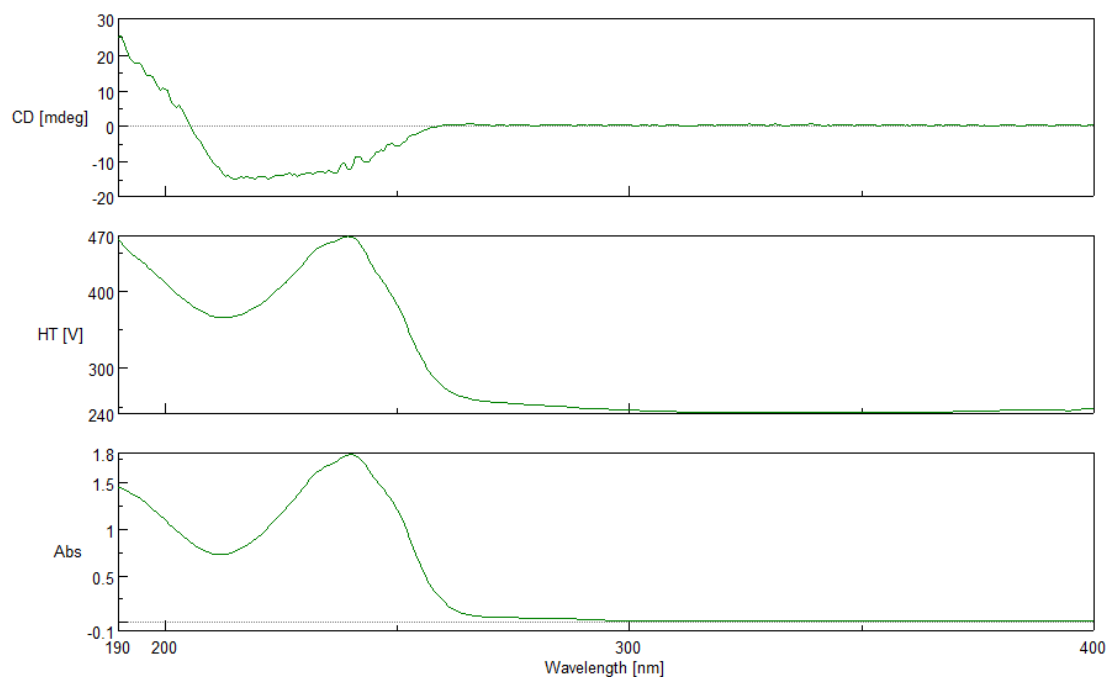

**Figure S8. UV and CD spectrum of 1**



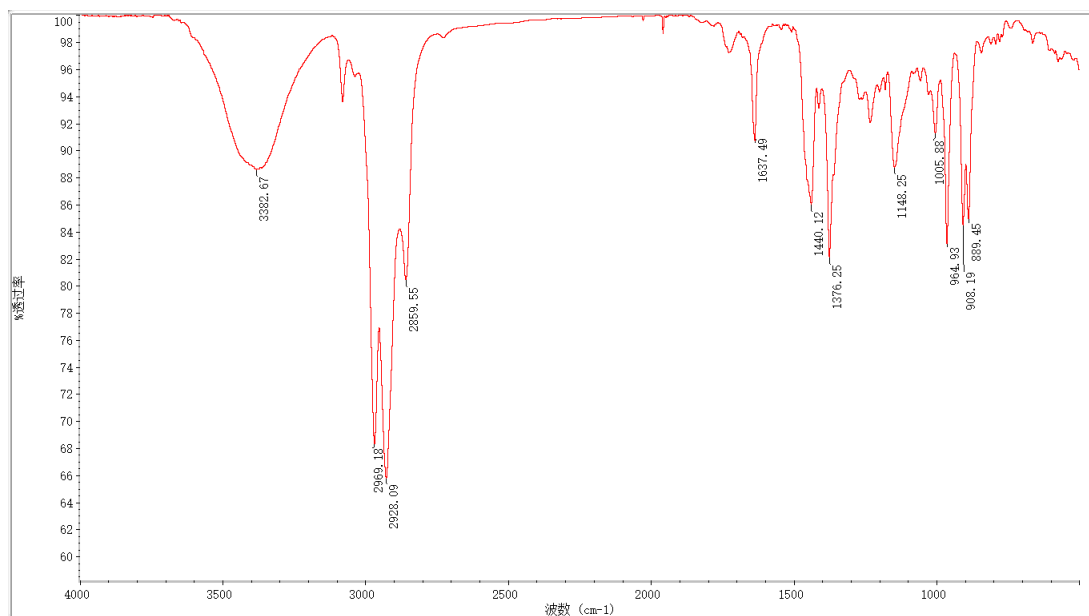

**Figure S9.** IR spectrum of **1**

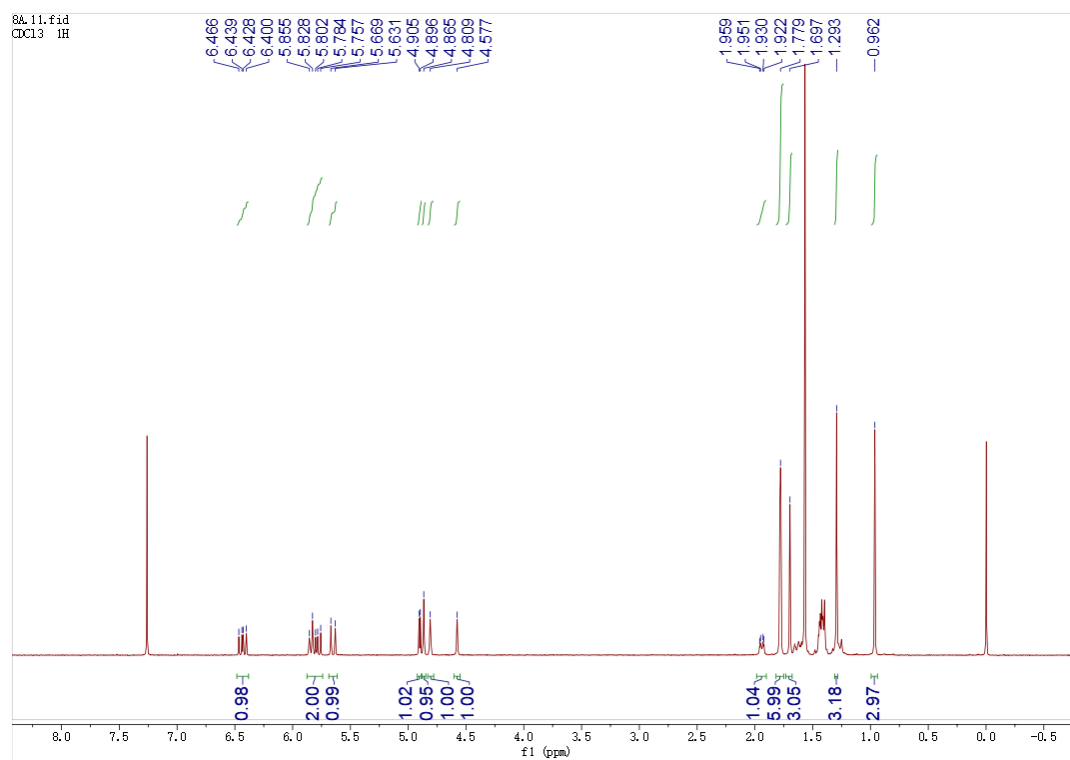

**Figure S10.** <sup>1</sup>H NMR spectrum of **2** (600MHz, CDCl<sub>3</sub>)

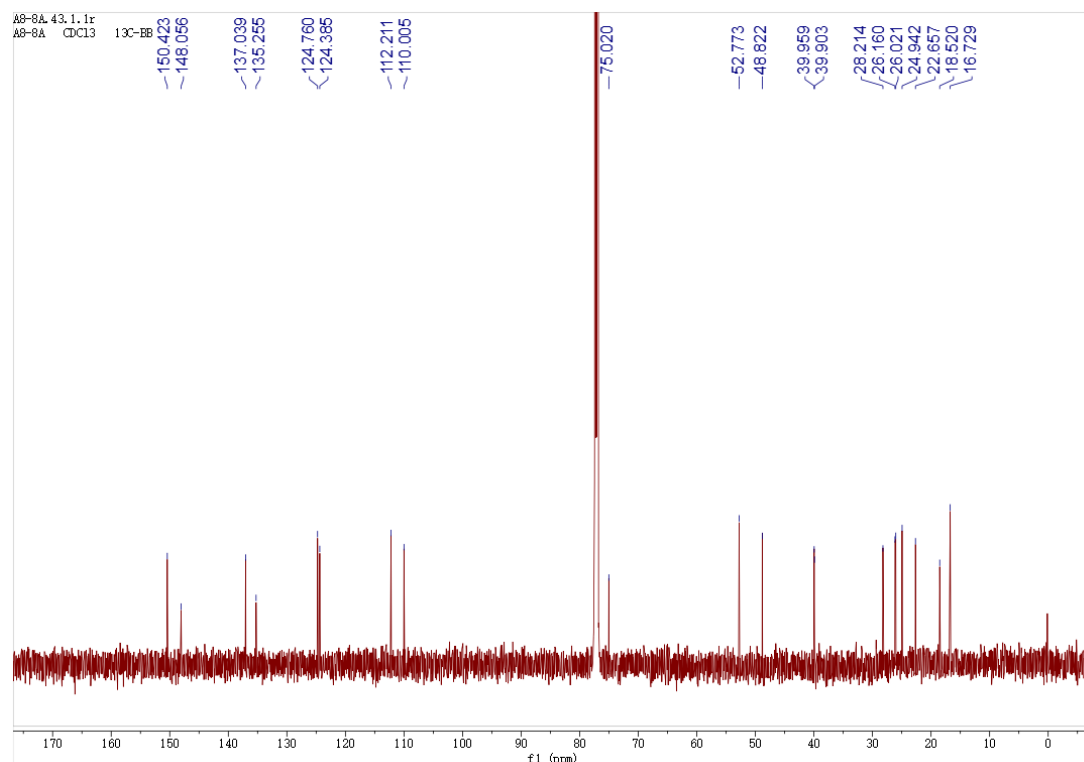

**Figure S11.**  $^{13}\text{C}$  NMR spectrum of **2** (125 MHz,  $\text{CDCl}_3$ )

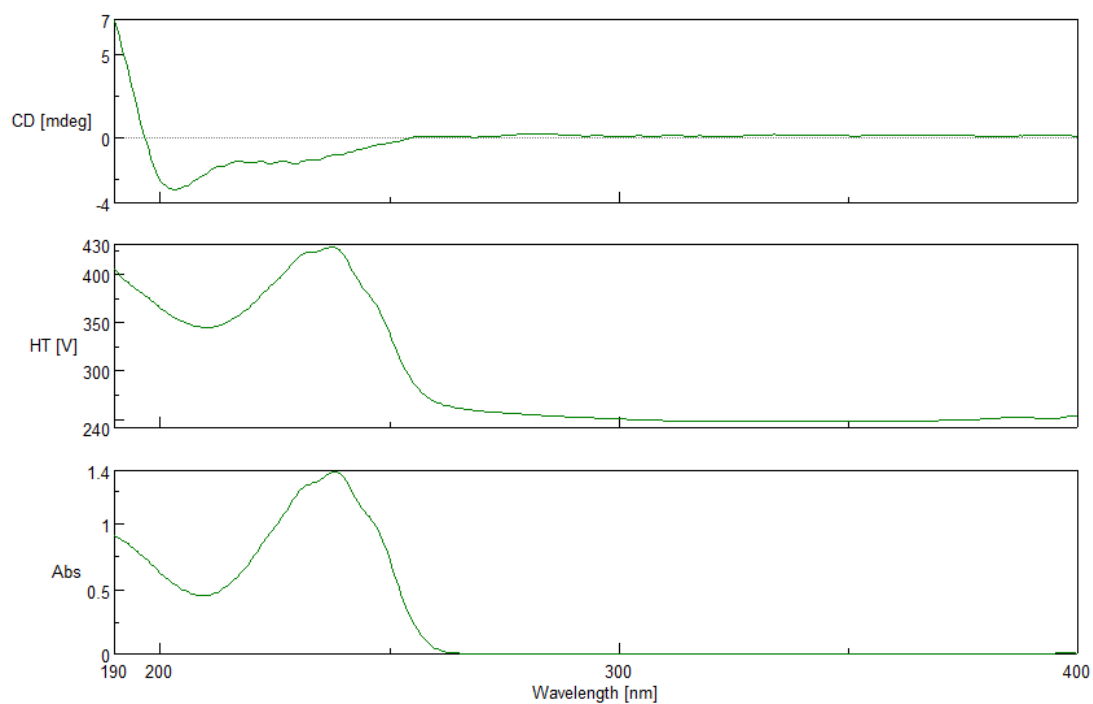

**Figure S12.** UV and CD spectrum of **2**

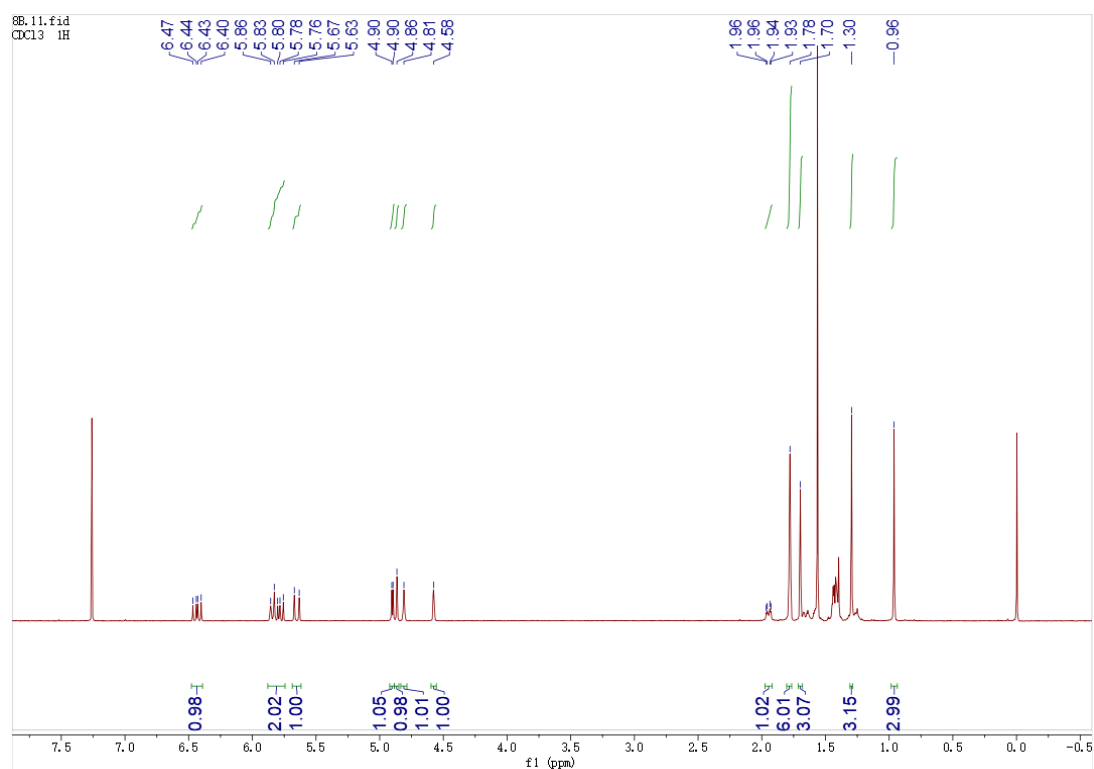

**Figure S13.**  $^1\text{H}$  NMR spectrum of **3** (600MHz,  $\text{CDCl}_3$ )

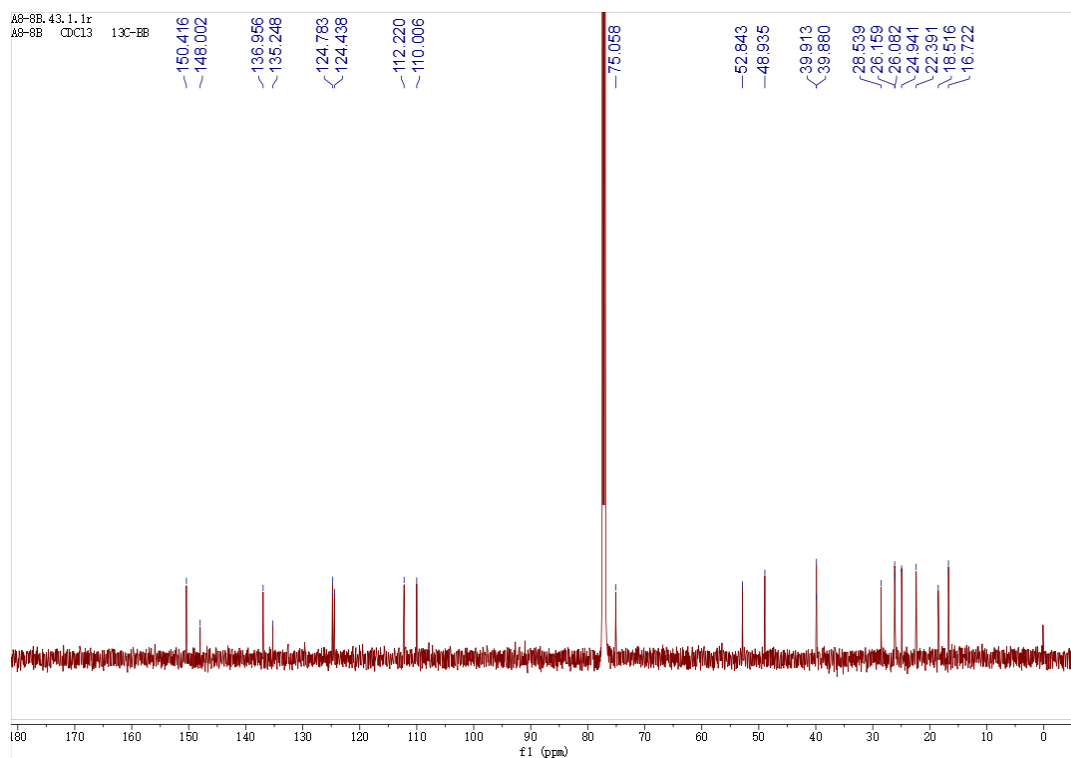

**Figure S14.**  $^{13}\text{C}$  NMR spectrum of **3** (125 MHz,  $\text{CDCl}_3$ )

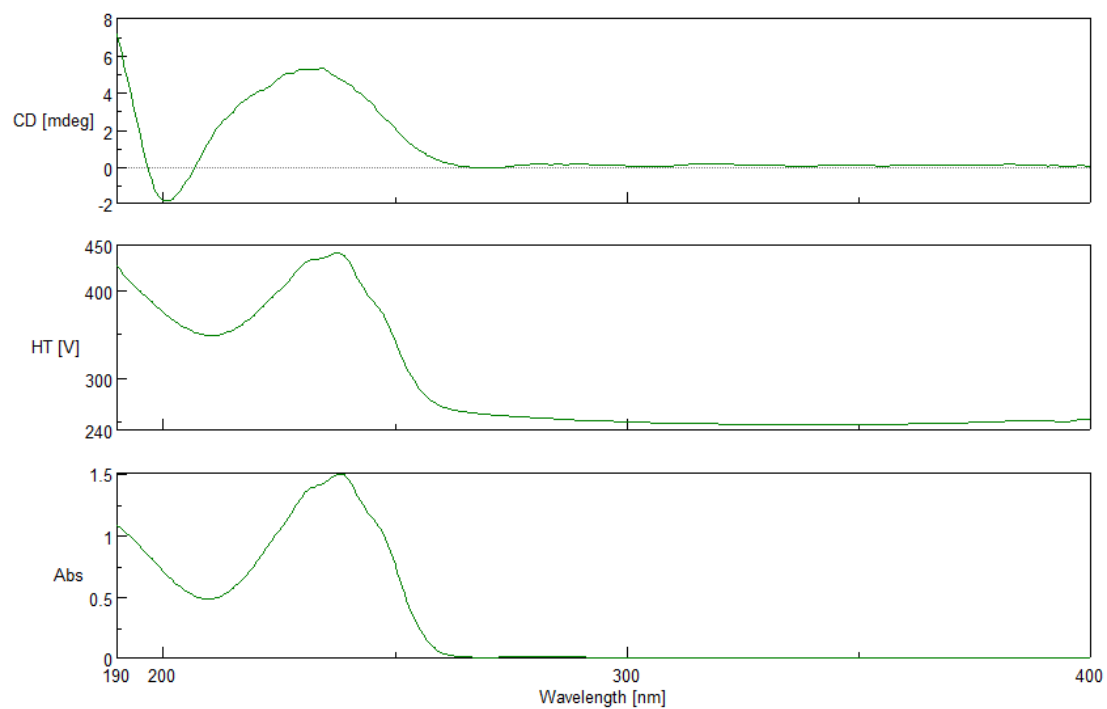

**Figure S15.** UV and CD spectrum of **3**

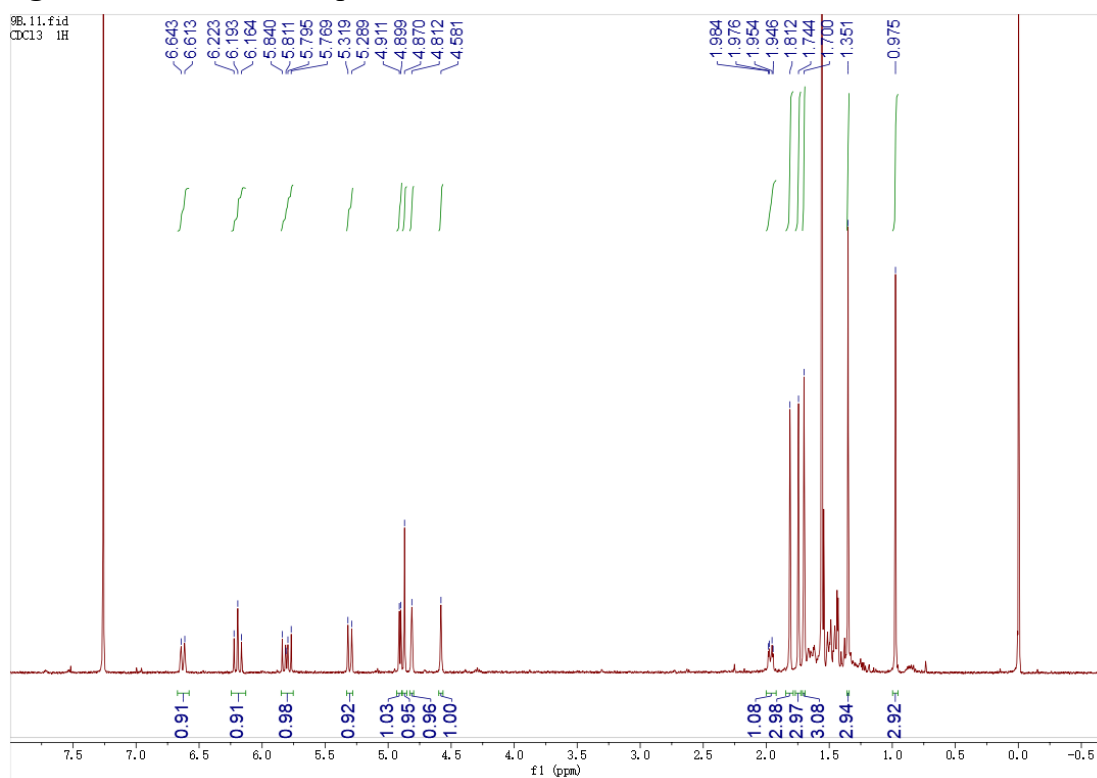

**Figure S16.**  $^1\text{H}$  NMR spectrum of **4** (600MHz,  $\text{CDCl}_3$ )

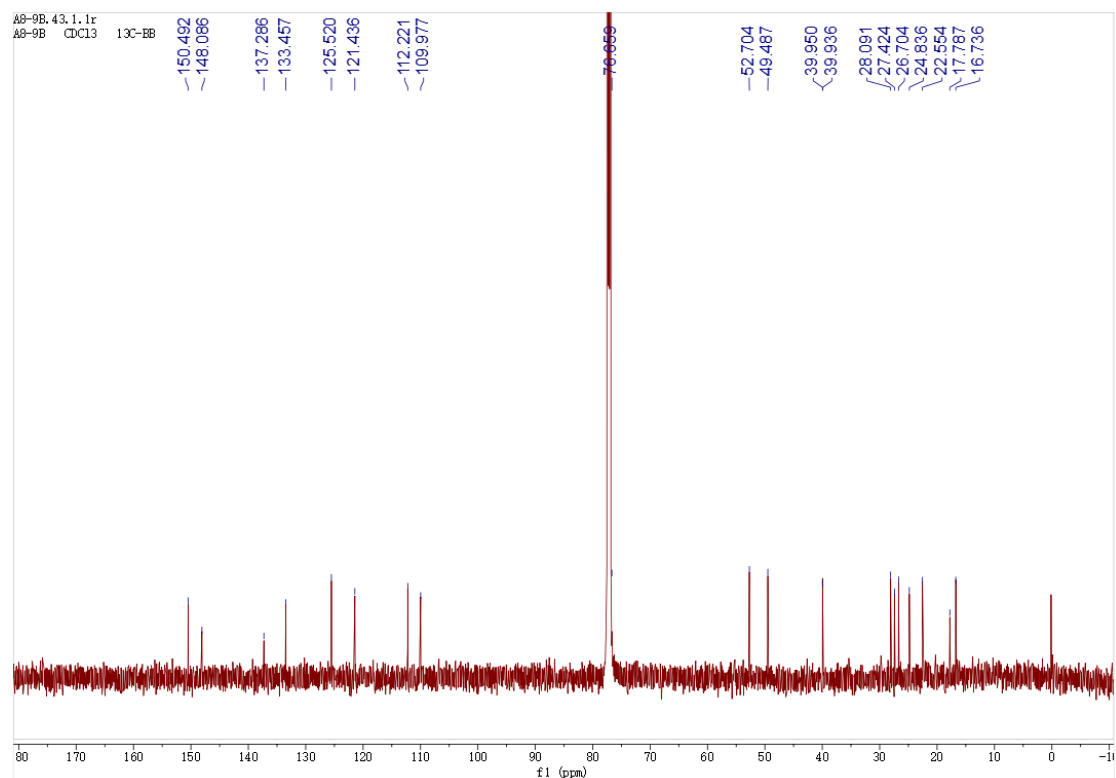

**Figure S17.** <sup>13</sup>C NMR spectrum of **4** (125 MHz, CDCl<sub>3</sub>)

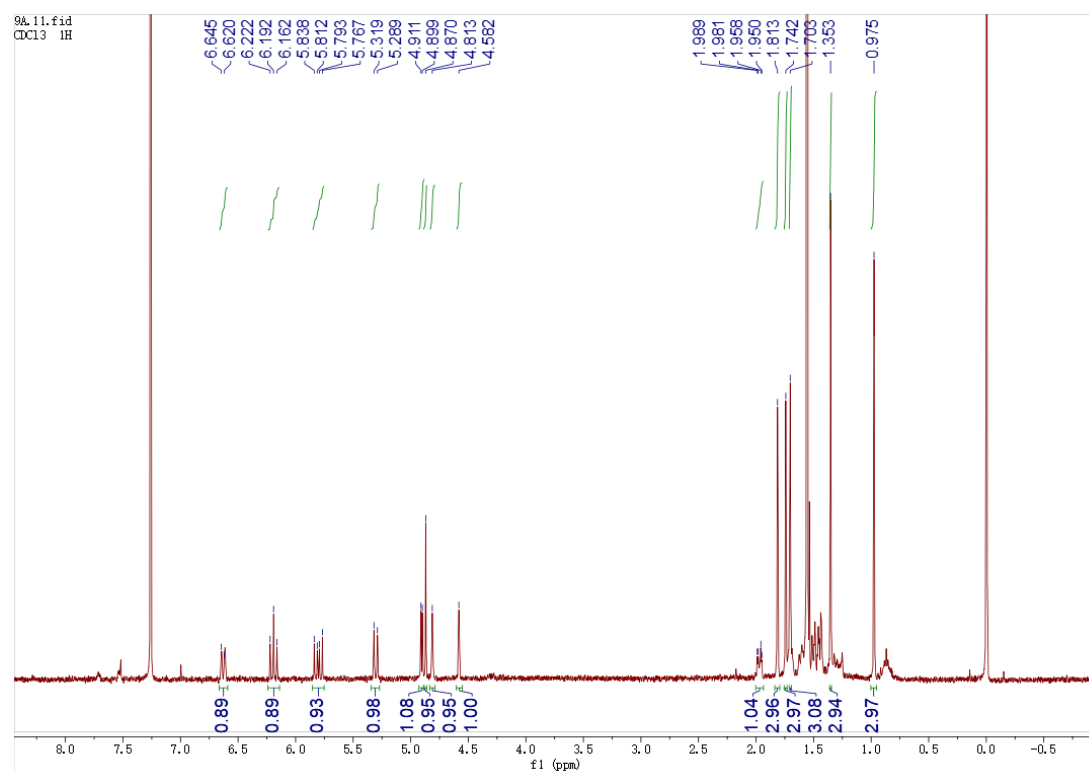

**Figure S18.** <sup>1</sup>H NMR spectrum of **5** (600MHz, CDCl<sub>3</sub>)

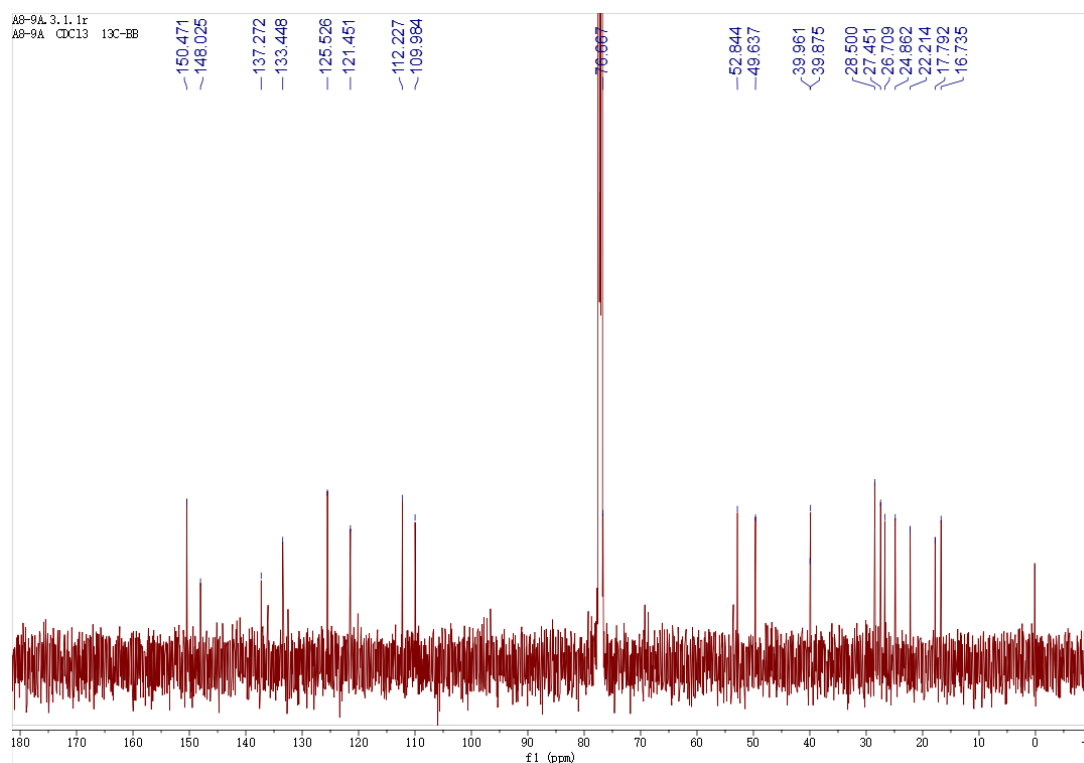

**Figure S19.**  $^{13}\text{C}$  NMR spectrum of **5** (125 MHz,  $\text{CDCl}_3$ )

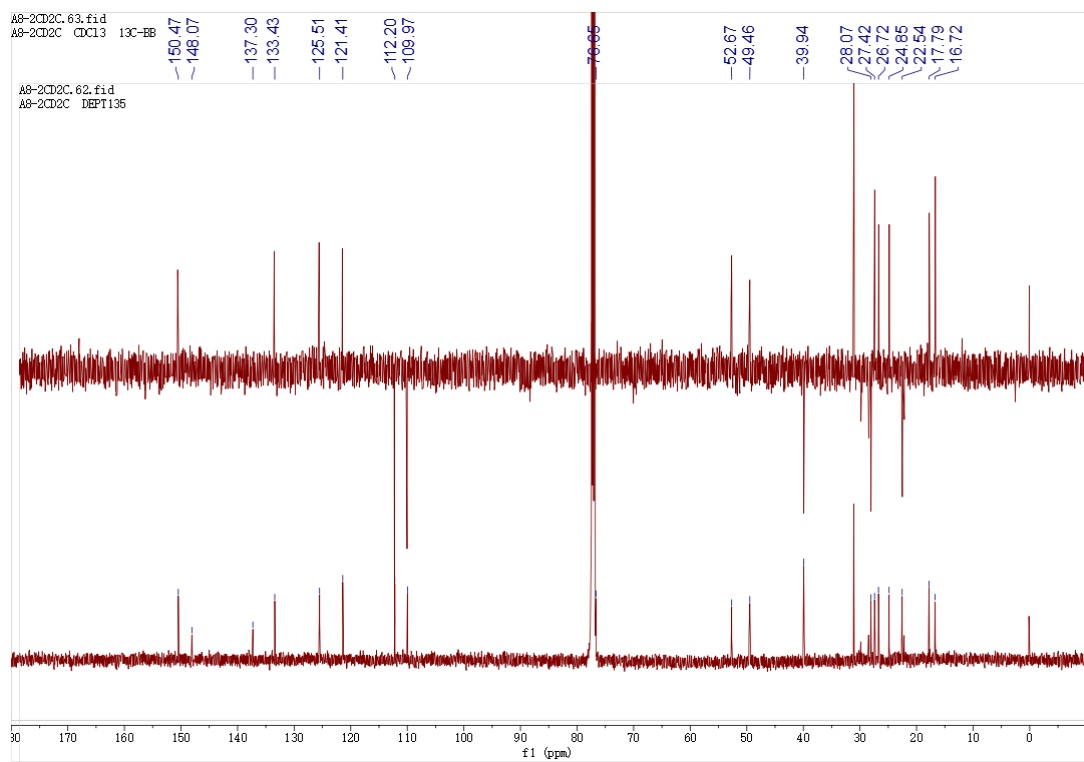

**Figure S20.**  $^{13}\text{C}$  NMR spectrum for mixture of **4** and **5** (125 MHz,  $\text{CDCl}_3$ )

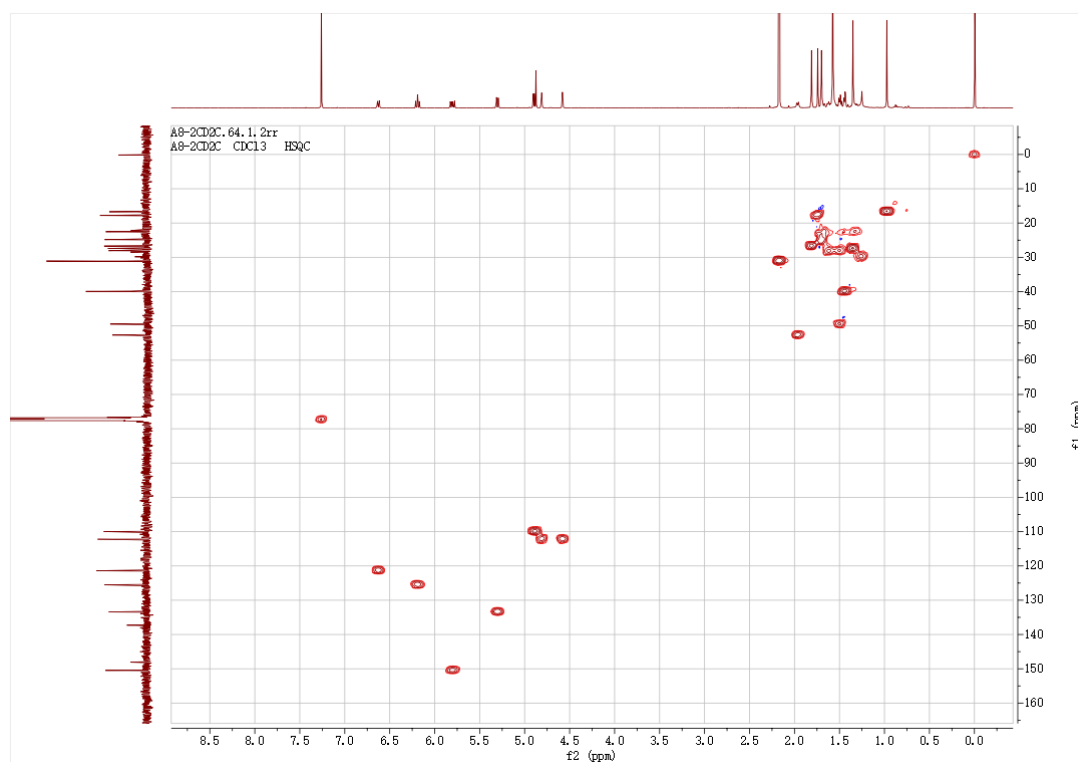

**Figure S21.** HSQC spectrum for mixture of **4** and **5** (600 MHz, CDCl<sub>3</sub>)

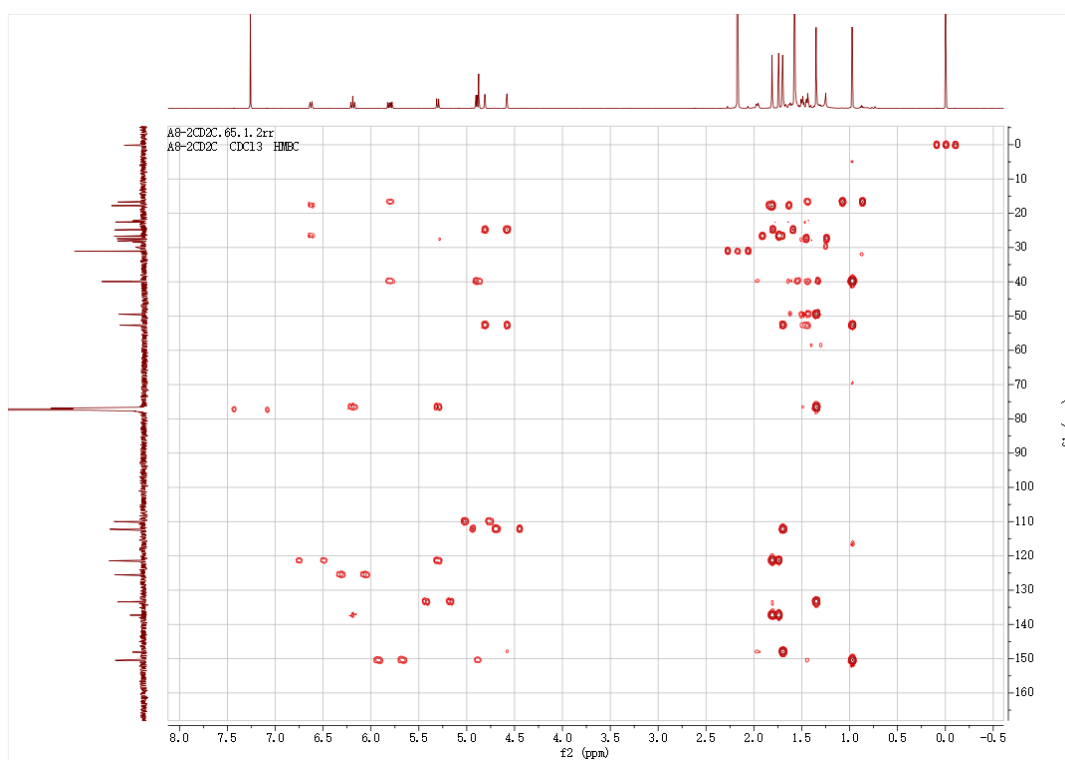

**Figure S22.** HMBC spectrum for mixture of **4** and **5** (600 MHz, CDCl<sub>3</sub>)

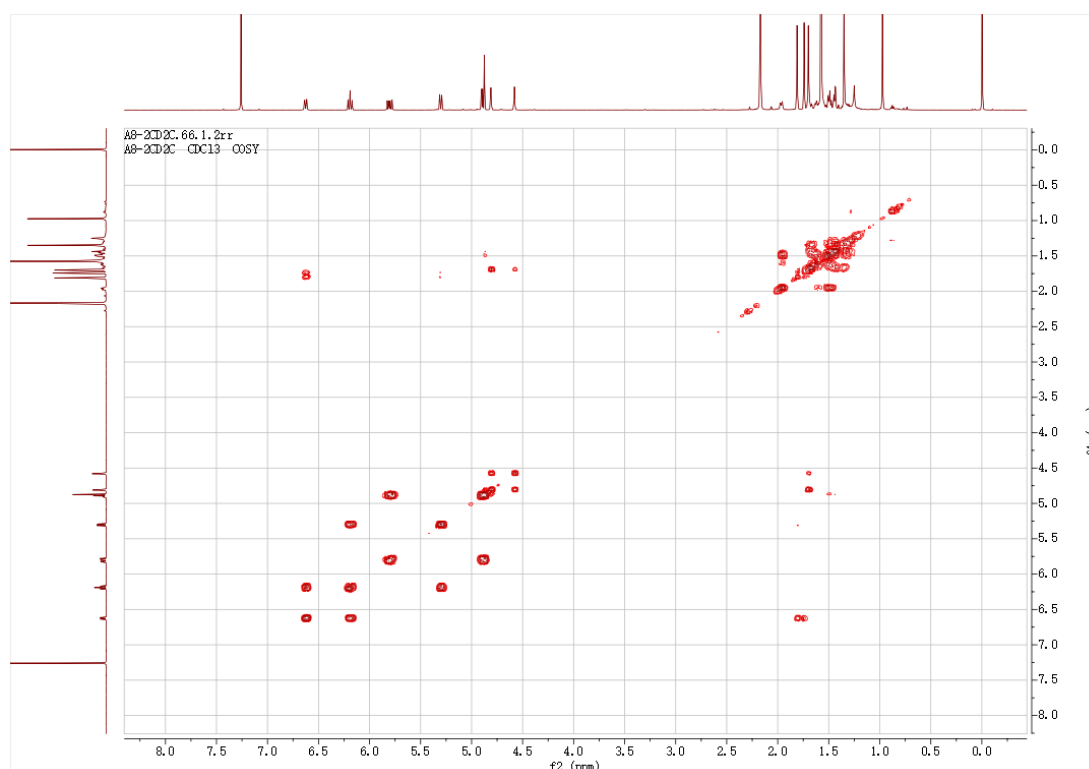

**Figure S23.**  $^1\text{H}$ - $^1\text{H}$  COSY spectrum for mixture of **4** and **5** (600 MHz,  $\text{CDCl}_3$ )

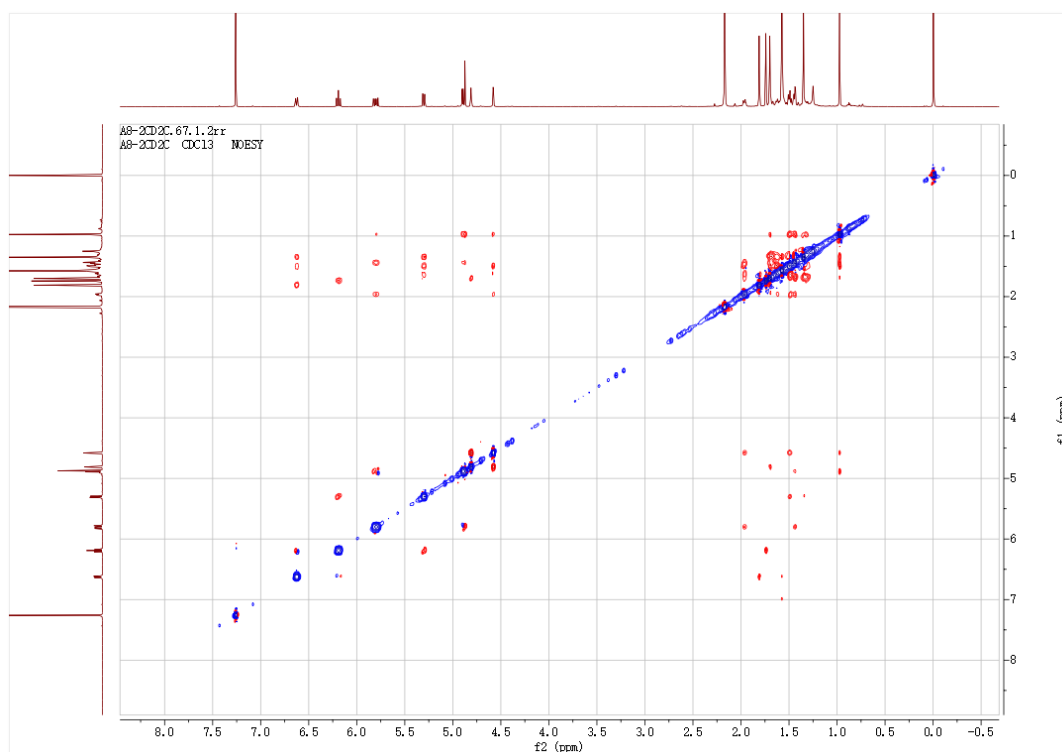

**Figure S24.** NOESY spectrum for mixture of **4** and **5** (600 MHz,  $\text{CDCl}_3$ )



EI202101585\_A8-2CD2C -c1#6 RT: 1.04

T: + c EI Full ms [ 49.50-800.50]

m/z= 48-803

| m/z      | Intensity | Relative | Theo.<br>Mass | Delta<br>(mmu) | RDB<br>equiv. | Composition                                    |
|----------|-----------|----------|---------------|----------------|---------------|------------------------------------------------|
| 245.1899 | 203136.0  | 0.22     | 245.1900      | -0.09          | 5.5           | C <sub>17</sub> H <sub>25</sub> O <sub>1</sub> |
| 245.2261 | 242856.0  | 0.26     | 245.2264      | -0.23          | 4.5           | C <sub>18</sub> H <sub>29</sub>                |
| 246.1945 | 95360.0   | 0.10     | 246.1978      | -3.31          | 5.0           | C <sub>17</sub> H <sub>26</sub> O <sub>1</sub> |
| 255.2110 | 361052.0  | 0.39     | 255.2107      | 0.26           | 6.5           | C <sub>19</sub> H <sub>27</sub>                |
| 256.2154 | 75098.0   | 0.08     | 256.2186      | -3.13          | 6.0           | C <sub>19</sub> H <sub>28</sub>                |
| 270.2346 | 581491.0  | 0.62     | 270.2342      | 0.44           | 6.0           | C <sub>20</sub> H <sub>30</sub>                |
| 271.2387 | 171166.0  | 0.18     | 271.2420      | -3.30          | 5.5           | C <sub>20</sub> H <sub>31</sub>                |
| 273.2214 | 335740.0  | 0.36     | 273.2213      | 0.11           | 5.5           | C <sub>19</sub> H <sub>29</sub> O <sub>1</sub> |
| 286.2296 | 77414.0   | 0.08     | 286.2291      | 0.47           | 6.0           | C <sub>20</sub> H <sub>30</sub> O <sub>1</sub> |
| 288.2454 | 176988.0  | 0.19     | 288.2448      | 0.60           | 5.0           | C <sub>20</sub> H <sub>32</sub> O <sub>1</sub> |

**Figure S25.** HREIMS spectrum for mixture of **4** and **5**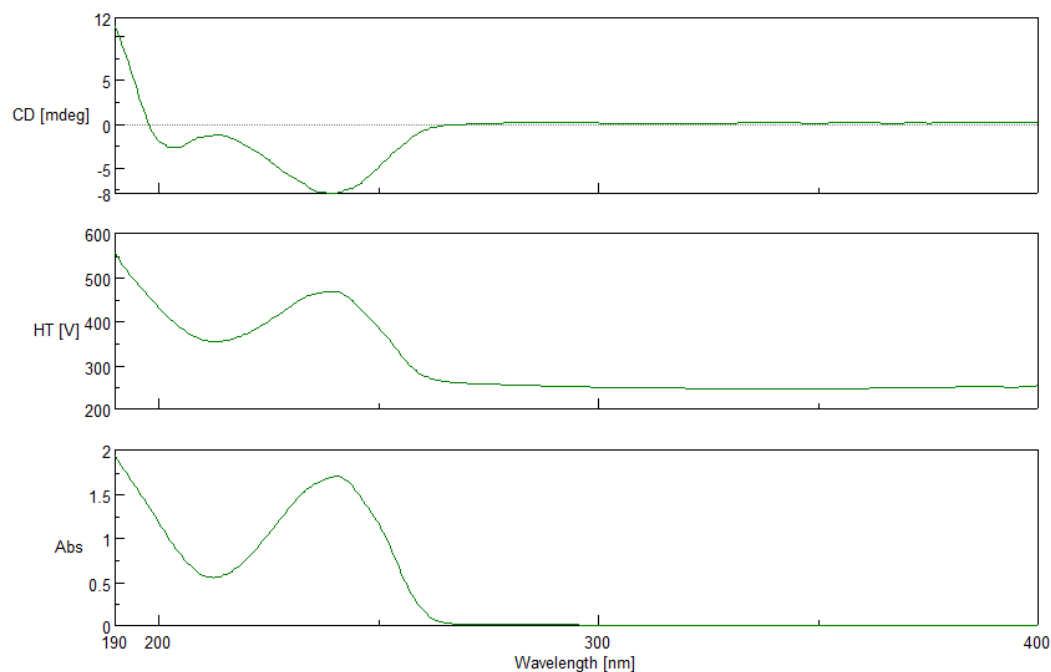**Figure S26.** UV and CD spectrum of **4**

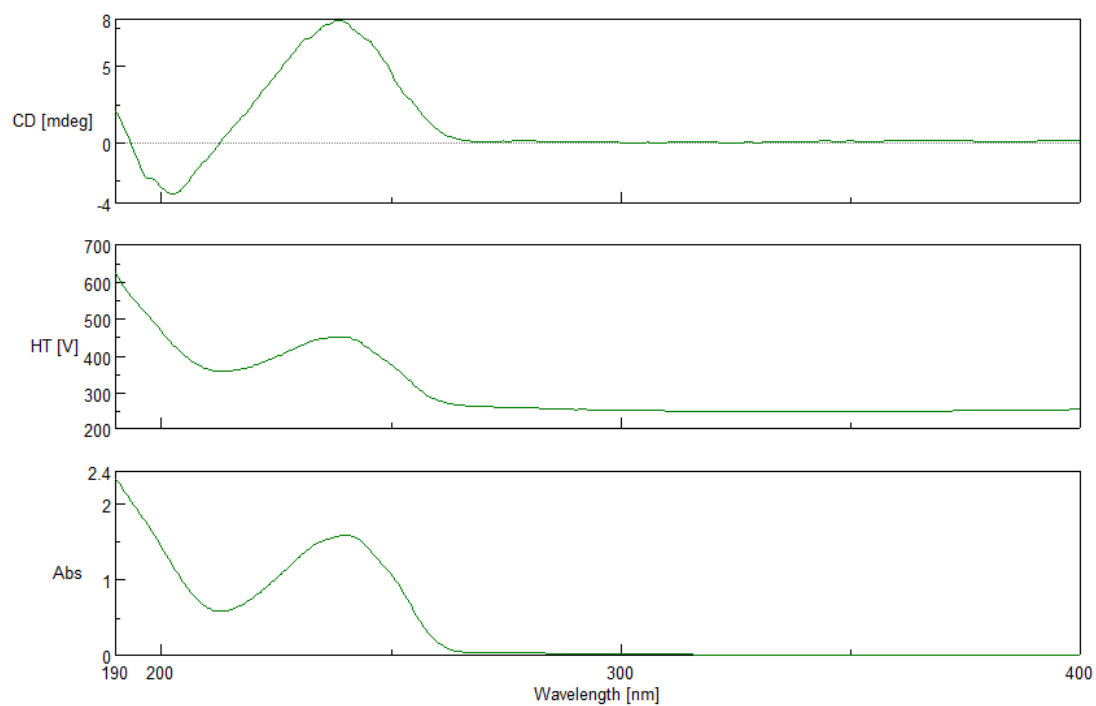

**Figure S27.** UV and CD spectrum of **5**

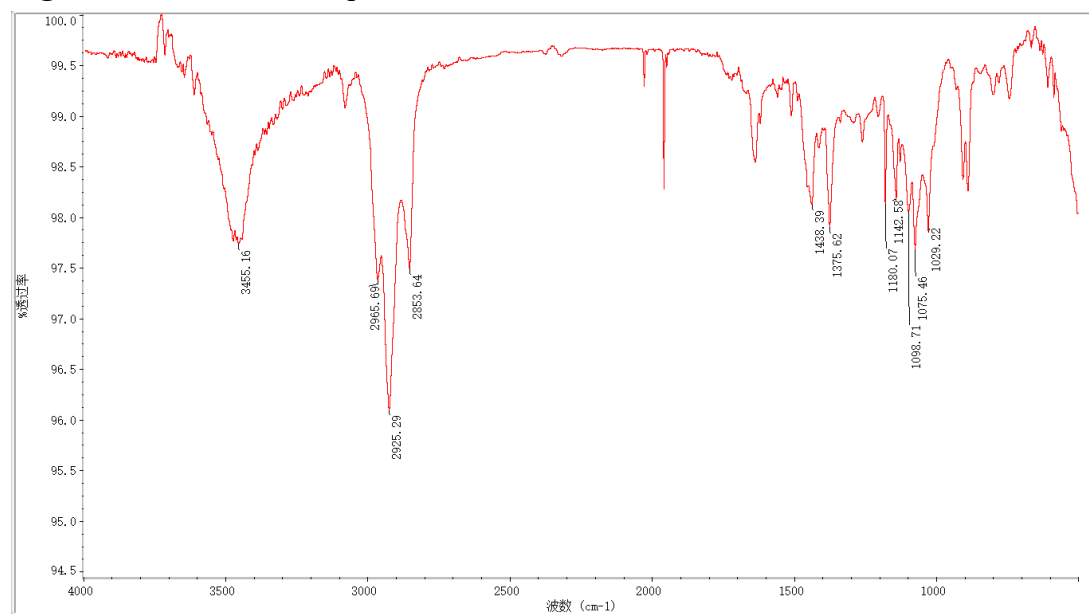

**Figure S28.** IR spectrum for mixture of **4** and **5**

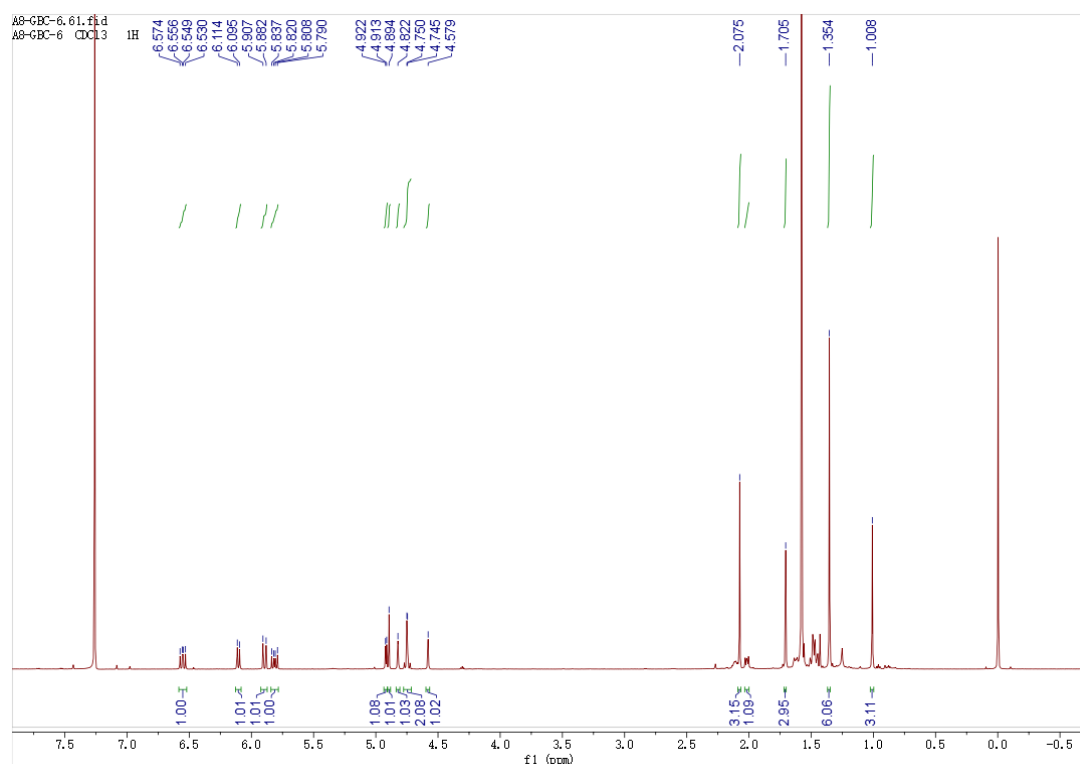

**Figure S29.** <sup>1</sup>H NMR spectrum of **6** (600MHz, CDCl<sub>3</sub>)

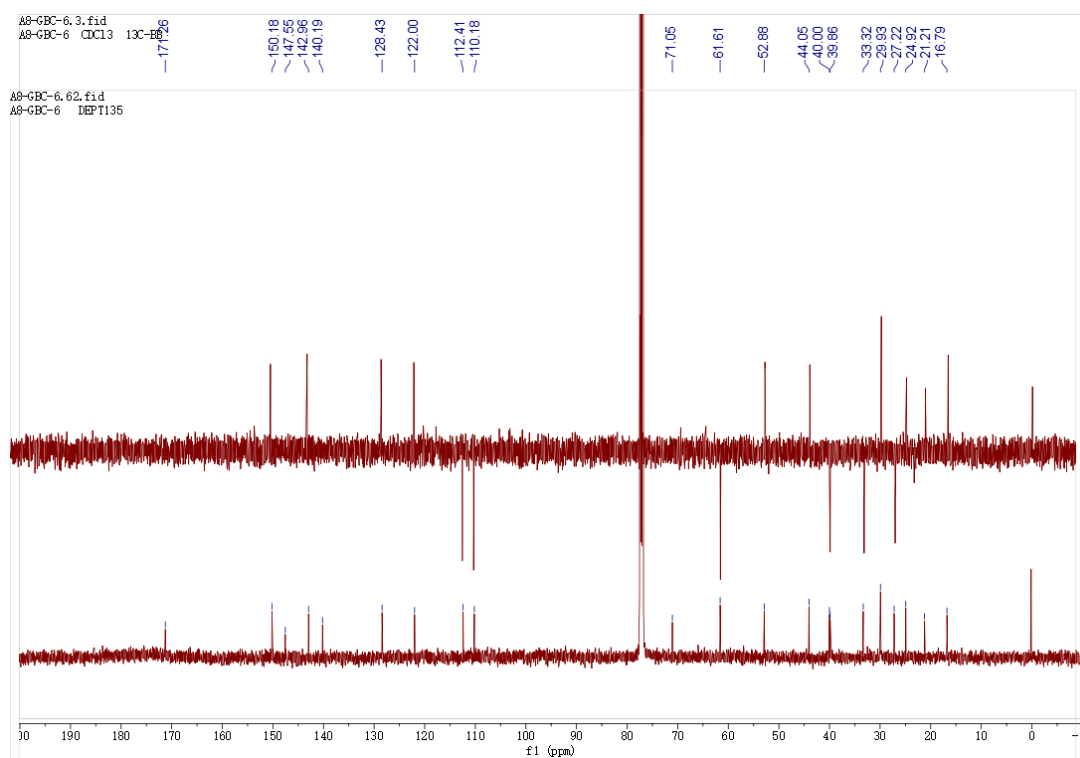

**Figure S30.** <sup>13</sup>C NMR spectrum of **6** (125 MHz, CDCl<sub>3</sub>)

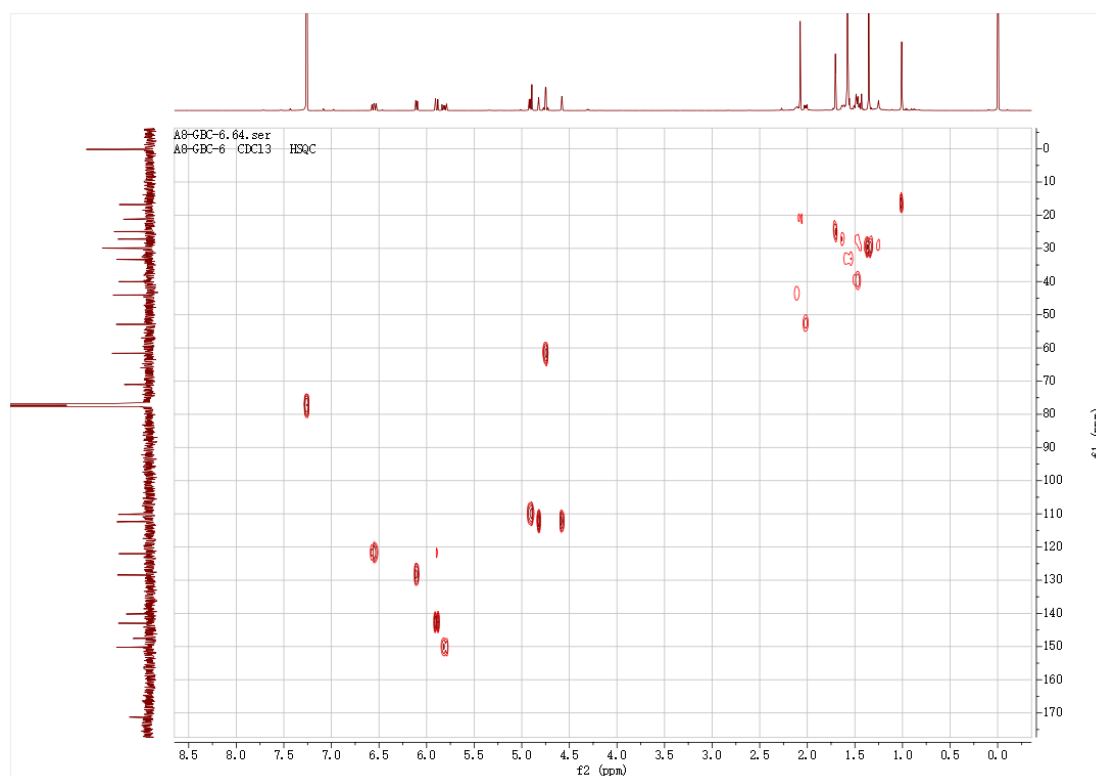

**Figure S31.** HSQC spectrum of **6** (600 MHz, CDCl<sub>3</sub>)

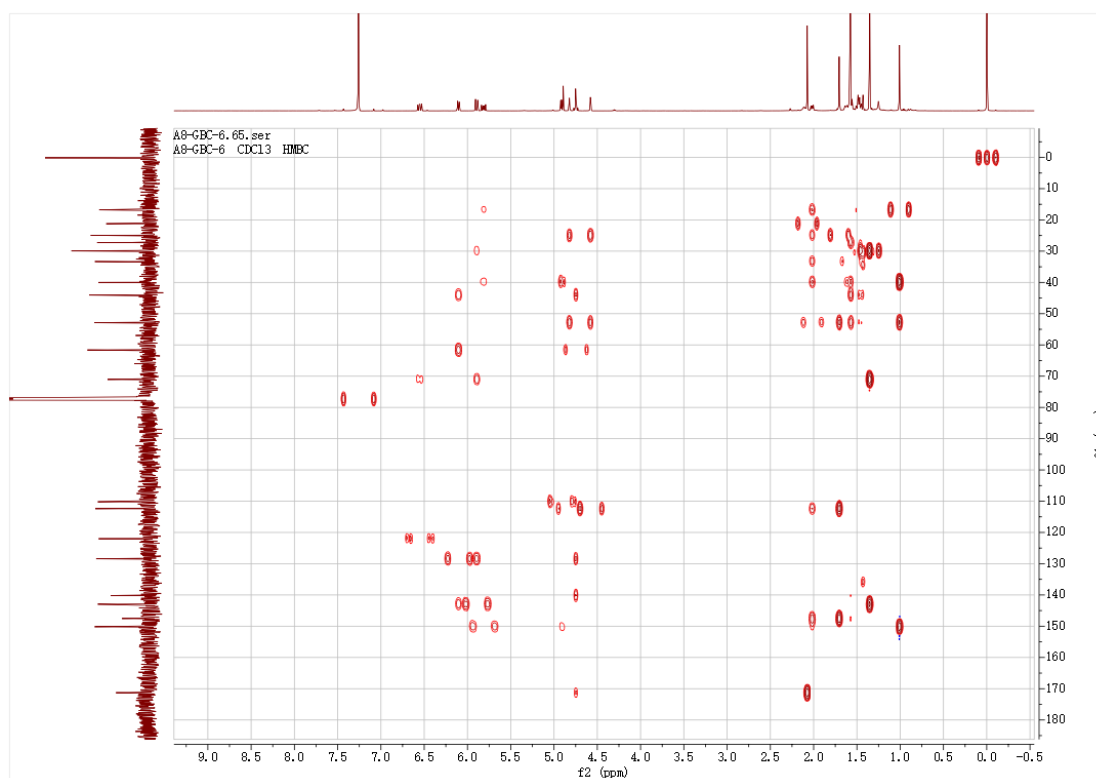

**Figure S32.** HMBC spectrum of **6** (600 MHz, CDCl<sub>3</sub>)

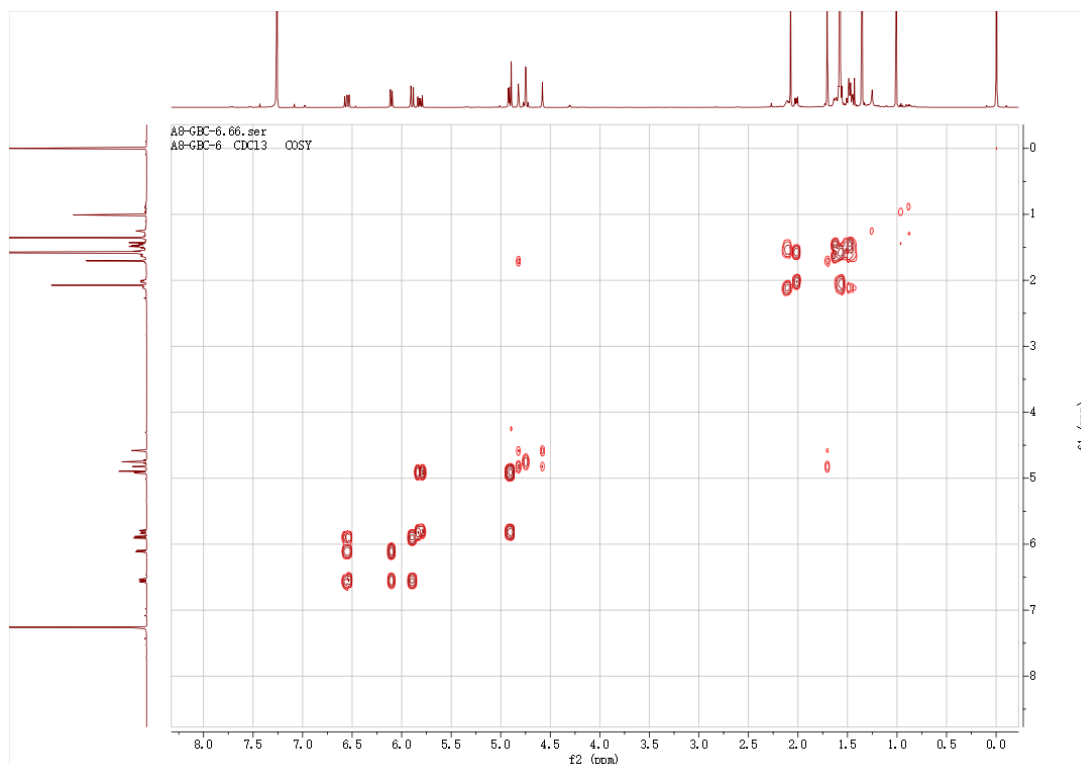

**Figure S33.**  $^1\text{H}$ - $^1\text{H}$  COSY spectrum of **6** (600 MHz,  $\text{CDCl}_3$ )

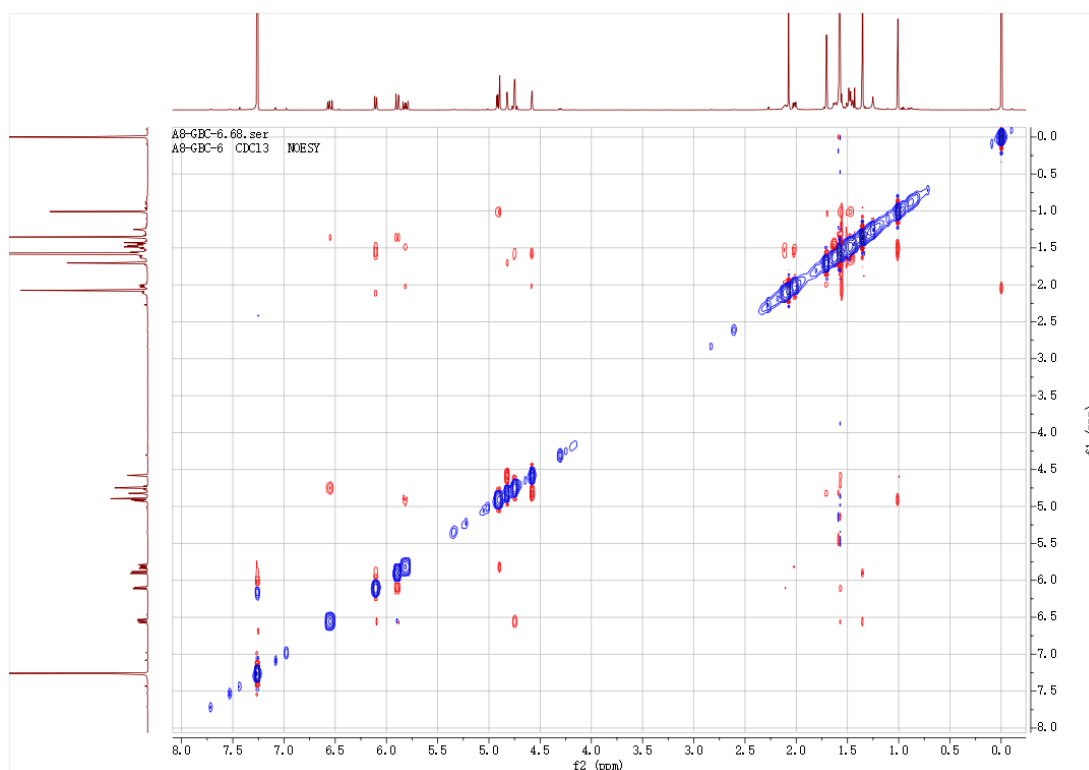

**Figure S34.** NOESY spectrum of **6** (600 MHz,  $\text{CDCl}_3$ )

## Qualitative Analysis Report

|                        |                                        |                               |                             |
|------------------------|----------------------------------------|-------------------------------|-----------------------------|
| <b>Data Filename</b>   | ESI202103307.d                         | <b>Sample Name</b>            | A8-GBC-6                    |
| <b>Sample ID</b>       |                                        | <b>Position</b>               | P1-C1                       |
| <b>Instrument Name</b> | Agilent G6520 Q-TOF                    | <b>Acq Method</b>             | 20160322_MS_ESIH_POS_1min.m |
| <b>Acquired Time</b>   | 7/2/2021 18:15:16                      | <b>IRM Calibration Status</b> | Success                     |
| <b>DA Method</b>       | small molecular data analysis method.m | <b>Comment</b>                | ESI202103307.d              |

### User Spectra

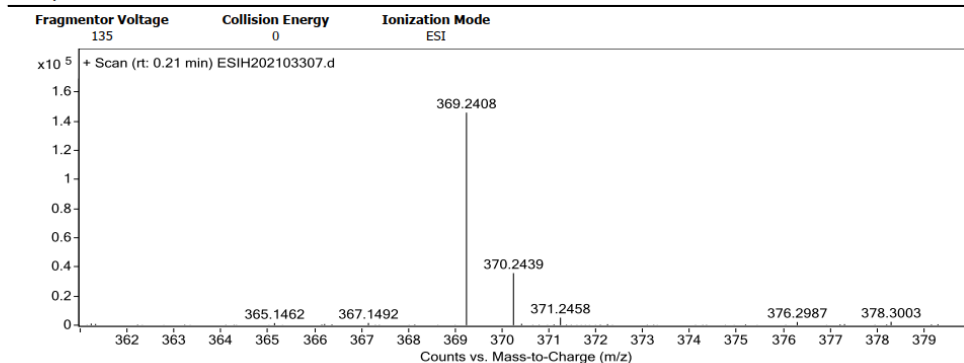

### Formula Calculator Results

| m/z      | Calc m/z | Diff (mDa) | Diff (ppm) | Ion Formula   | Ion     |
|----------|----------|------------|------------|---------------|---------|
| 369.2408 | 369.24   | -0.77      | -2.09      | C22 H34 Na O3 | (M+Na)+ |

--- End Of Report ---

**Figure S35. HRESIMS spectrum of 6**

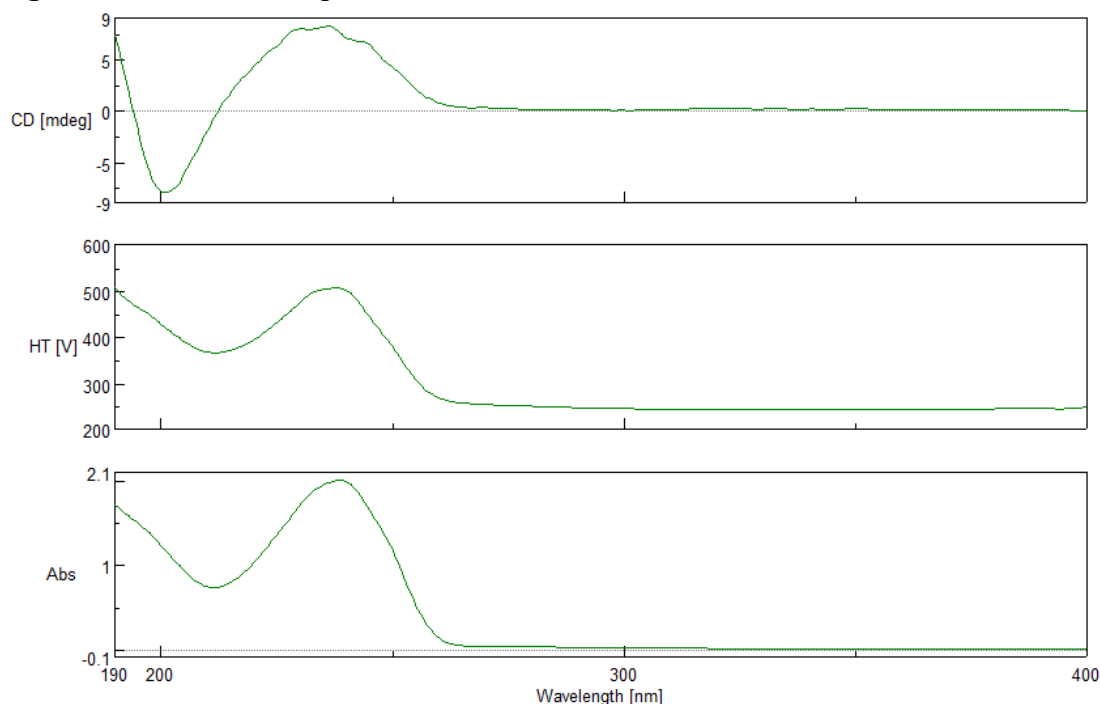

**Figure S36. UV and CD spectrum of 6**

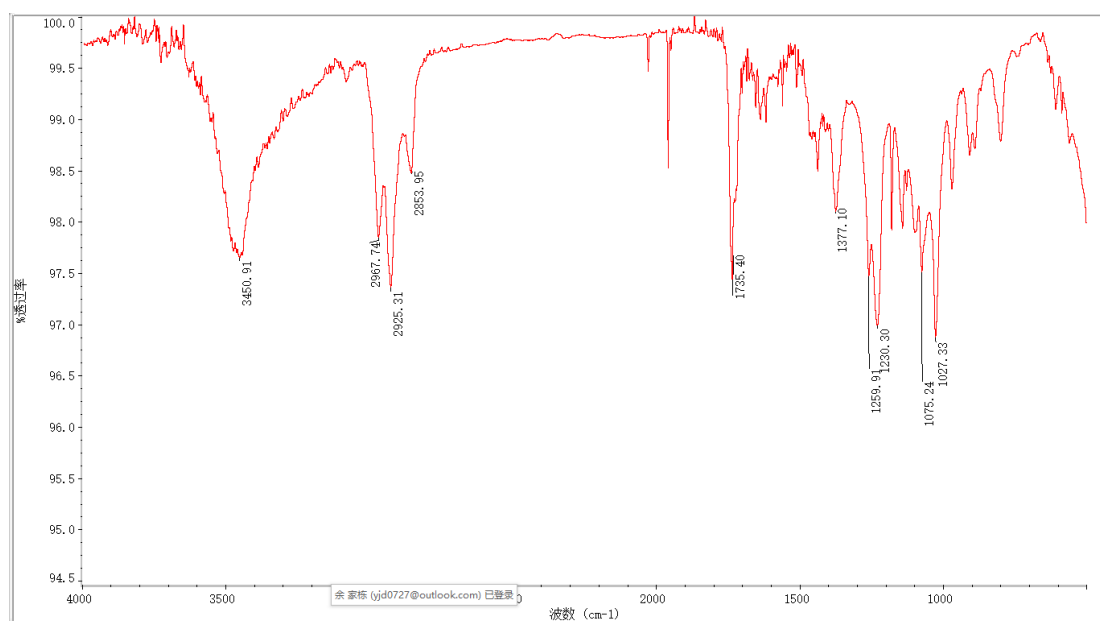

Figure S37. IR spectrum of 6

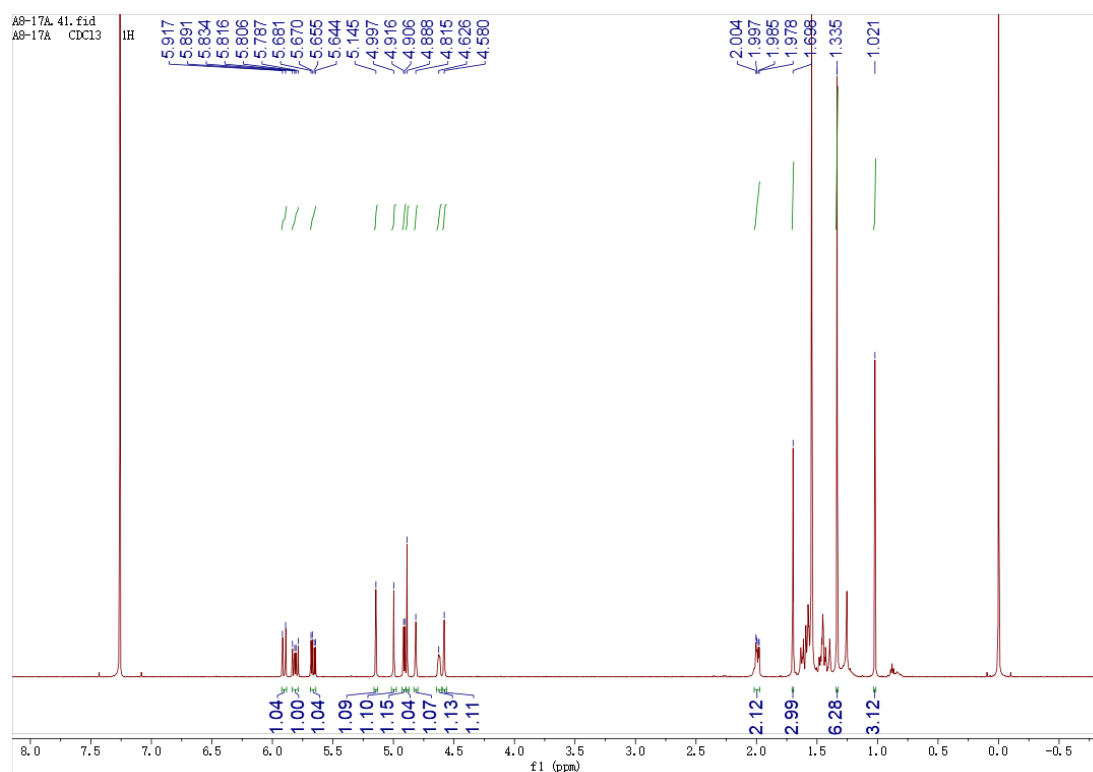

Figure S38. <sup>1</sup>H NMR spectrum of 7 (600MHz, CDCl<sub>3</sub>)

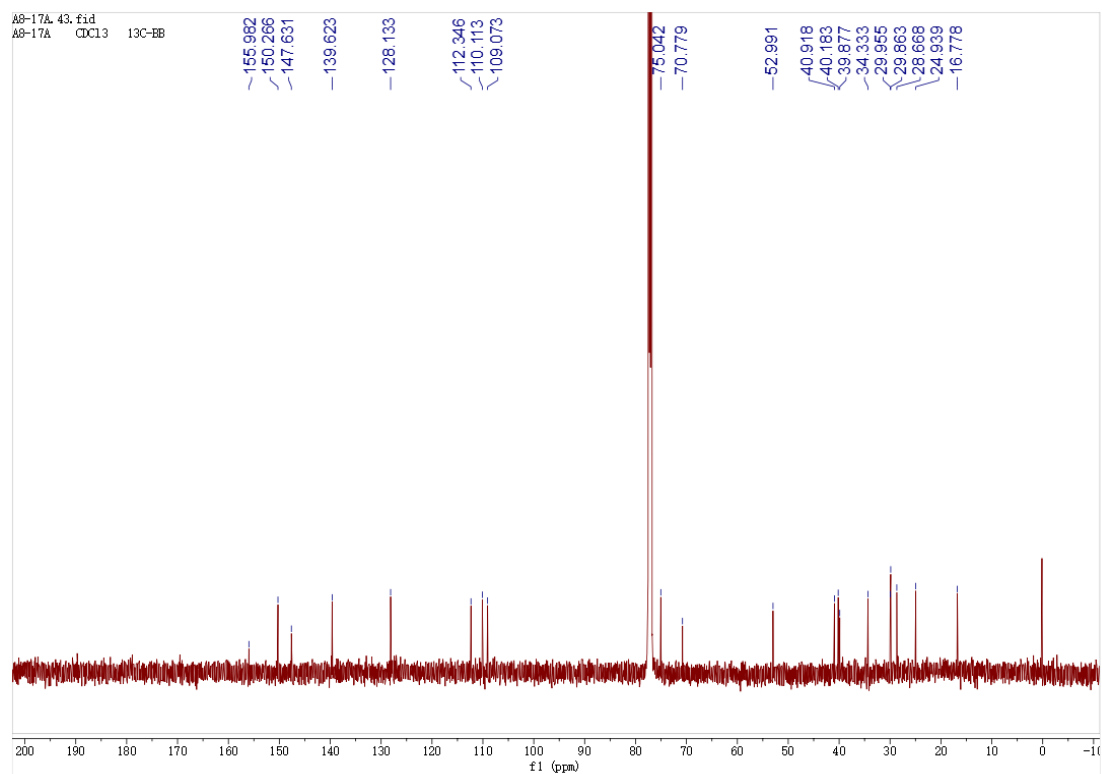

**Figure S39.** <sup>13</sup>C NMR spectrum of **7** (125 MHz, CDCl<sub>3</sub>)

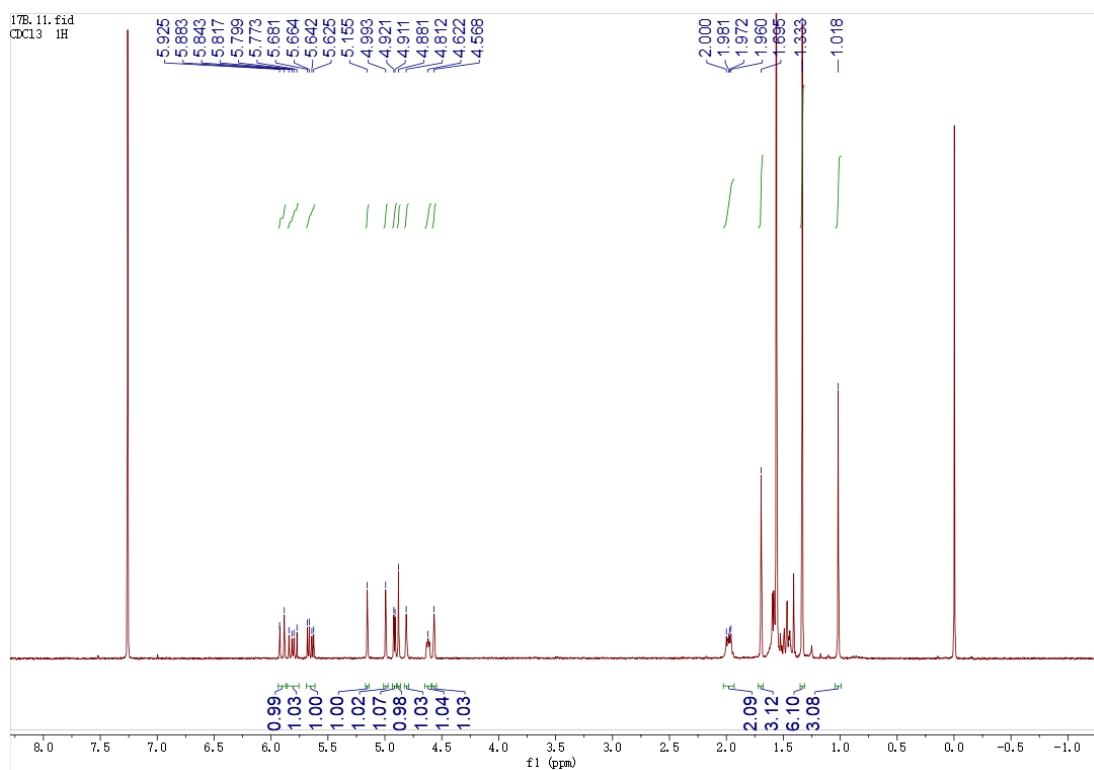

**Figure S40.** <sup>1</sup>H NMR spectrum of **8** (600MHz, CDCl<sub>3</sub>)



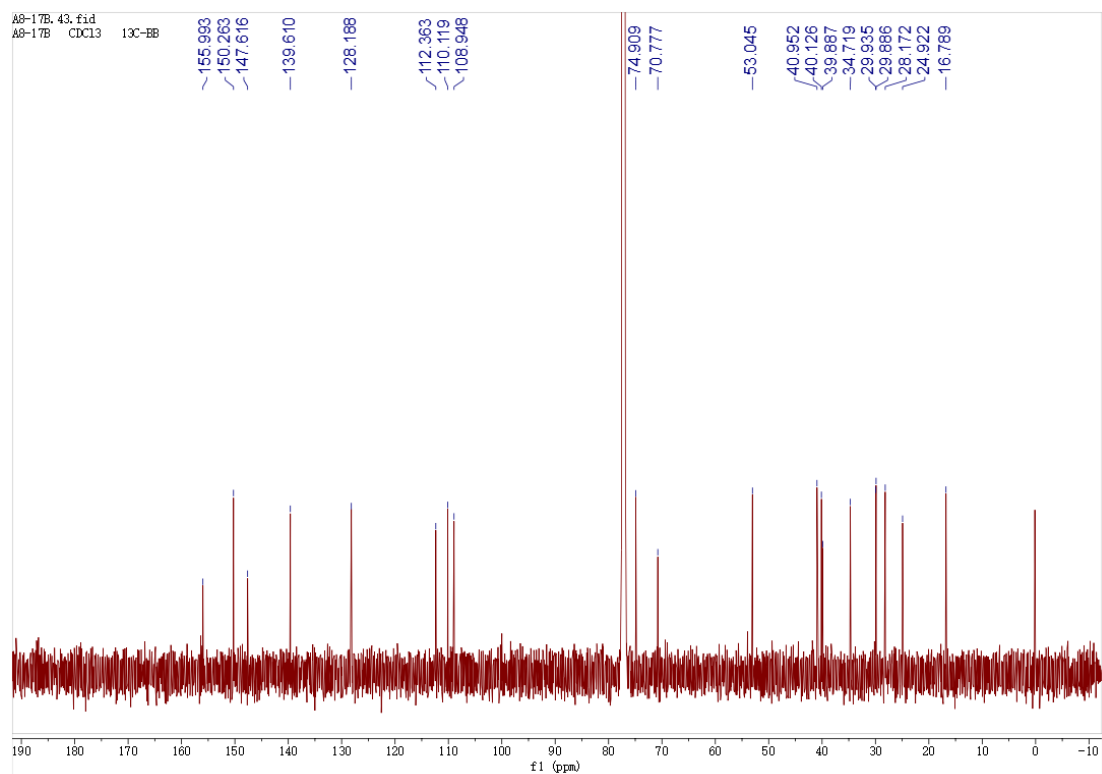

**Figure S41.**  $^{13}\text{C}$  NMR spectrum of **8** (125 MHz, CDCl<sub>3</sub>)

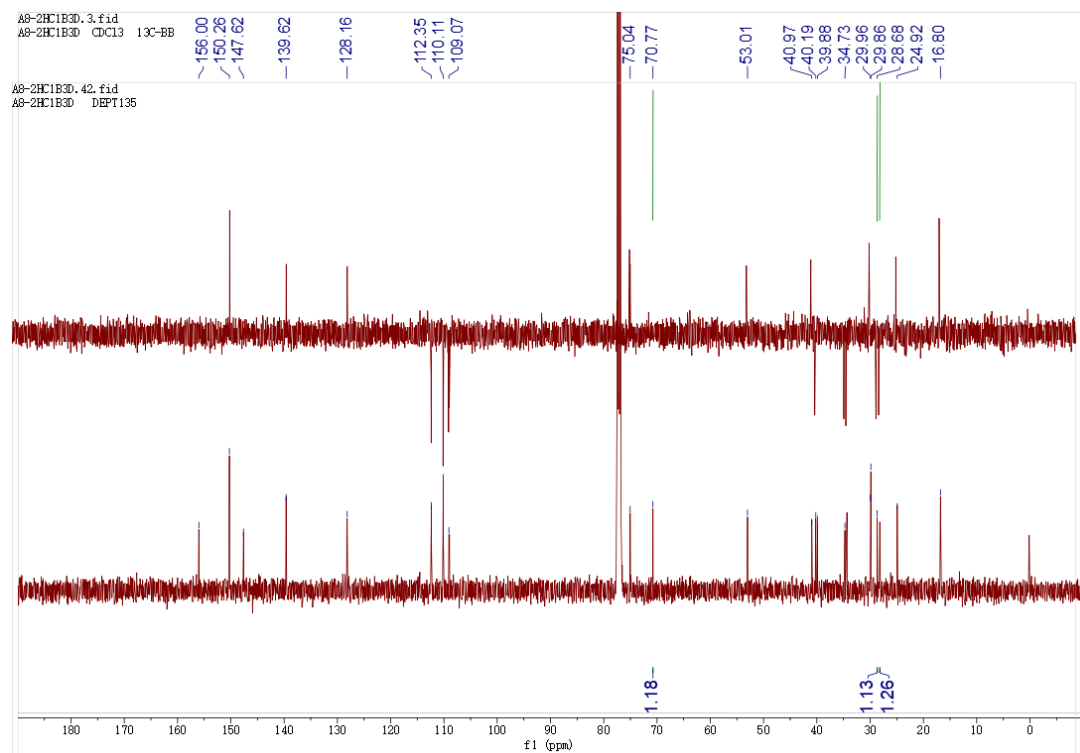

**Figure S42.**  $^{13}\text{C}$  NMR spectrum for mixture of **7** and **8** (125 MHz, CDCl<sub>3</sub>)

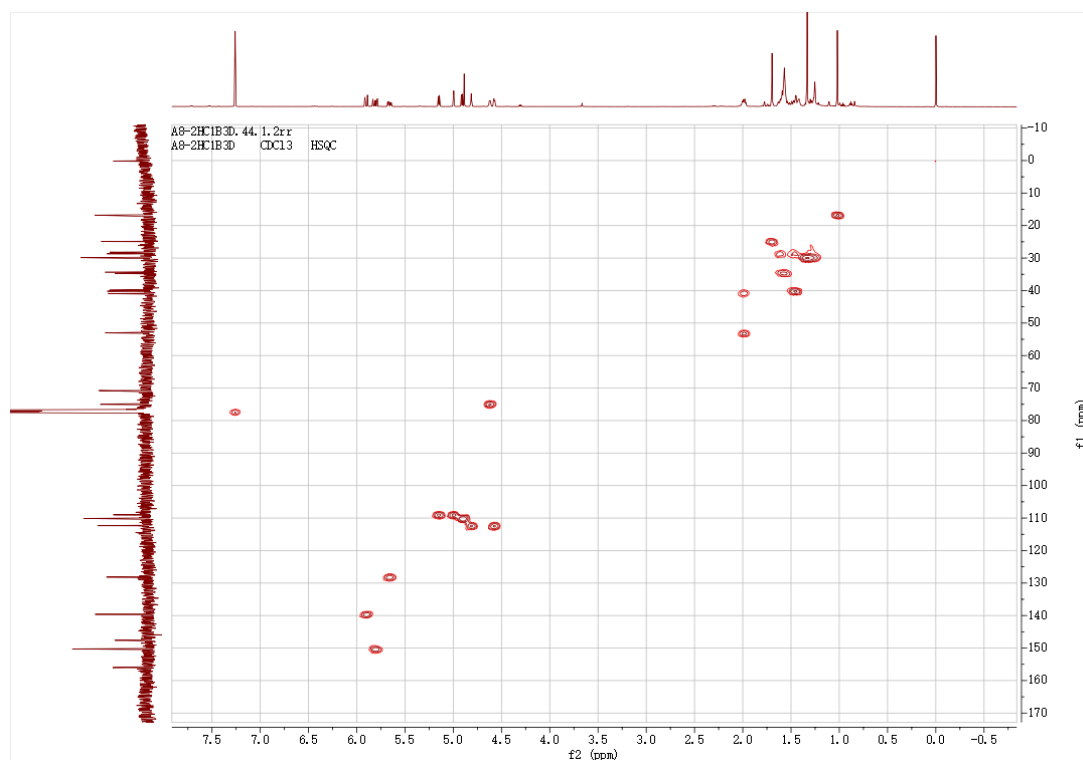

**Figure S43.** HSQC spectrum for mixture of **7** and **8** (600 MHz, CDCl<sub>3</sub>)

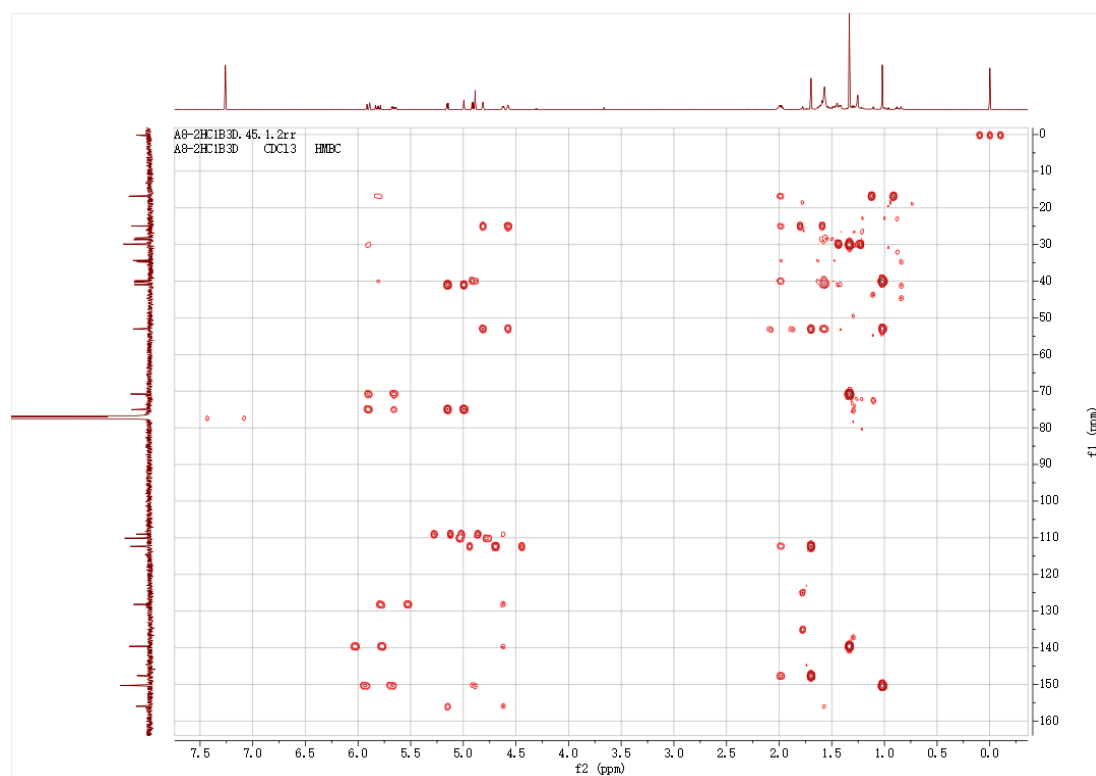

**Figure S44.** HMBC spectrum for mixture of **7** and **8** (600 MHz, CDCl<sub>3</sub>)

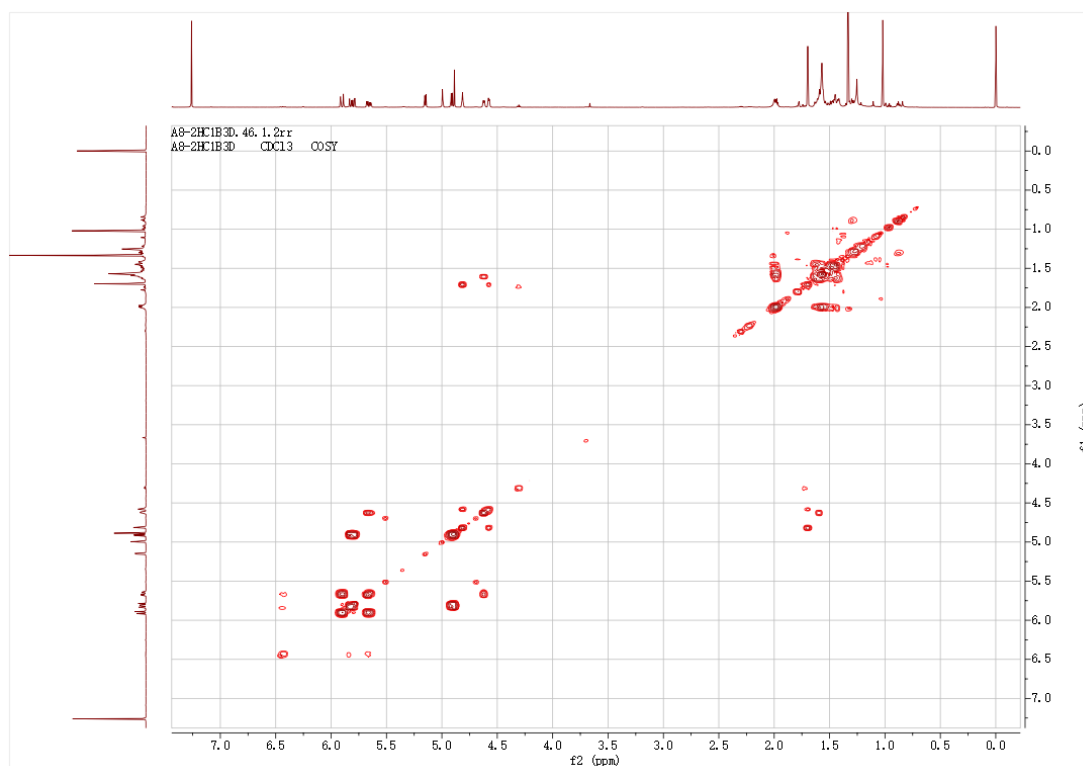

**Figure S45.**  $^1\text{H}$ - $^1\text{H}$  COSY spectrum for mixture of **7** and **8** (600 MHz,  $\text{CDCl}_3$ )

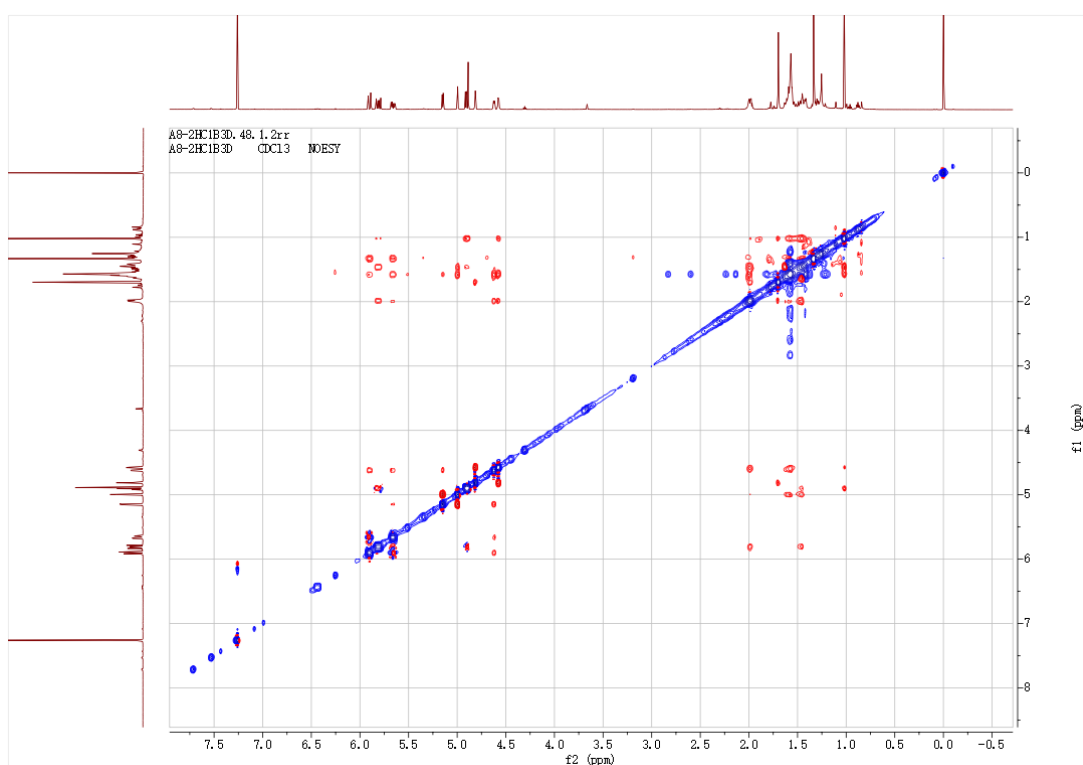

**Figure S46.** NOESY spectrum for mixture of **7** and **8** (600 MHz,  $\text{CDCl}_3$ )

## Qualitative Analysis Report

|                        |                                        |                               |                             |
|------------------------|----------------------------------------|-------------------------------|-----------------------------|
| <b>Data Filename</b>   | ESI202104715-1.d                       | <b>Sample Name</b>            | A8-A8-2HC1B3D               |
| <b>Sample ID</b>       |                                        | <b>Position</b>               | P1-B6                       |
| <b>Instrument Name</b> | Agilent G6520 Q-TOF                    | <b>Acq Method</b>             | 20160324_MS_ESIH_NEG_1min.m |
| <b>Acquired Time</b>   | 10/22/2021 19:29:36                    | <b>IRM Calibration Status</b> | Success                     |
| <b>DA Method</b>       | small molecular data analysis method.m | <b>Comment</b>                | ESIH by zhuzhenyun          |

### User Spectra

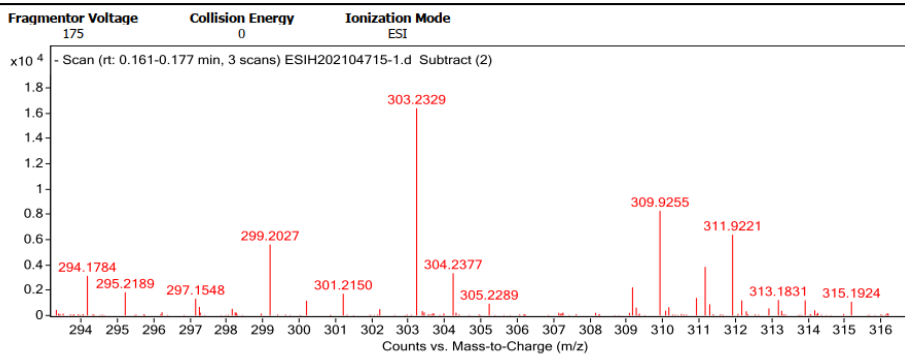

### Formula Calculator Results

| m/z      | Calc m/z | Diff (mDa) | Diff (ppm) | Ion Formula                                    | Ion                |
|----------|----------|------------|------------|------------------------------------------------|--------------------|
| 303.2329 | 303.233  | 0.01       | 0.02       | C <sub>20</sub> H <sub>31</sub> O <sub>2</sub> | (M-H) <sup>-</sup> |

--- End Of Report ---

**Figure S47.** HRESIMS spectrum for mixture of **7** and **8**

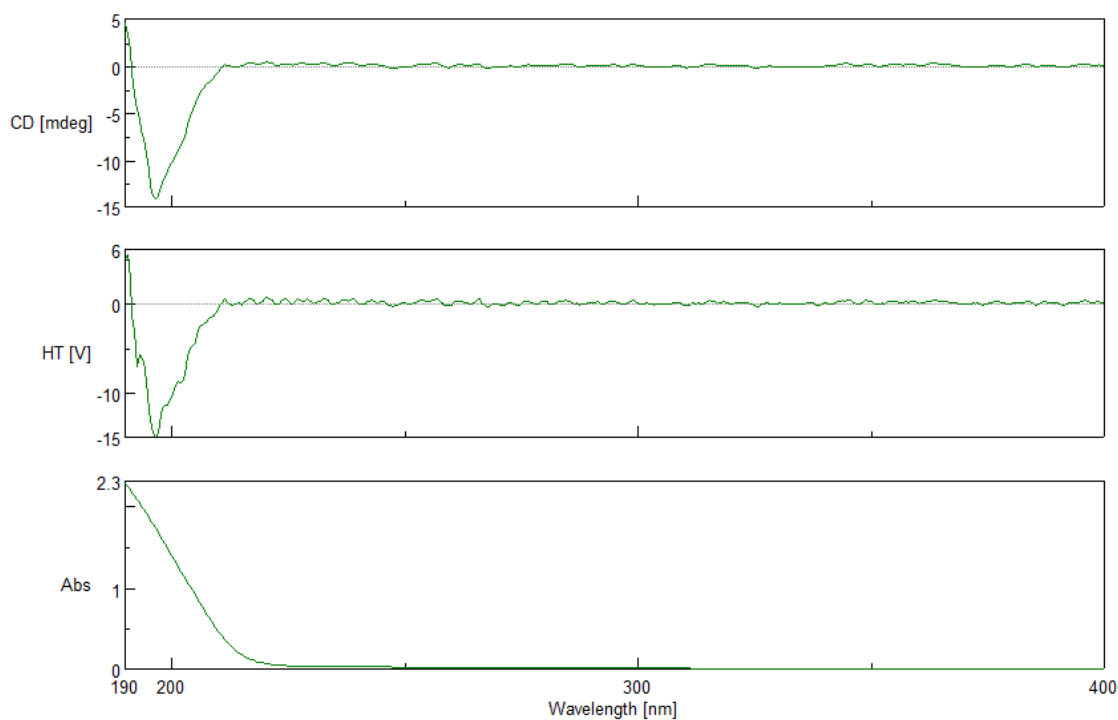

**Figure S48.** UV and CD spectrum of **7**

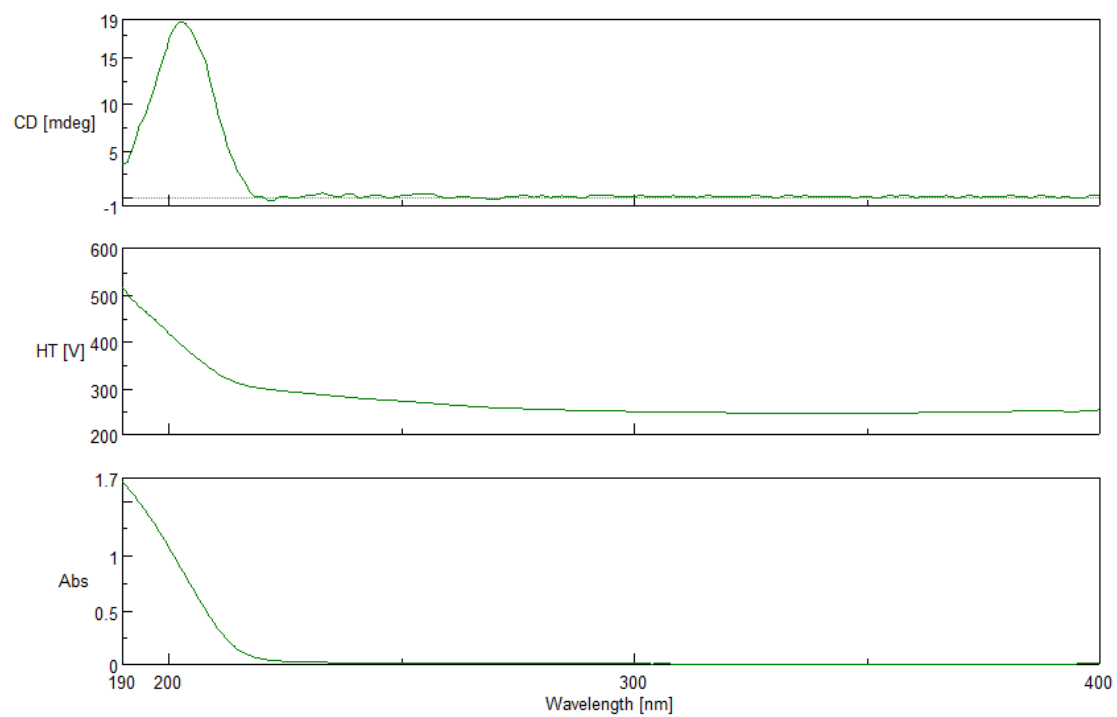

**Figure S49.** UV and CD spectrum of **8**

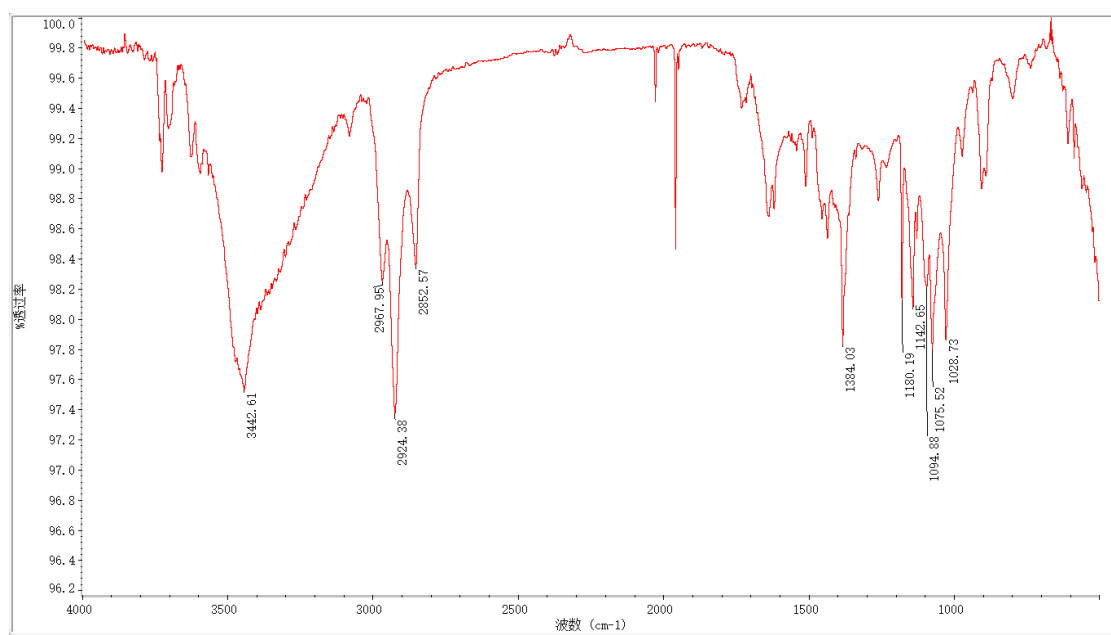

**Figure S50.** IR spectrum for mixture of **7** and **8**

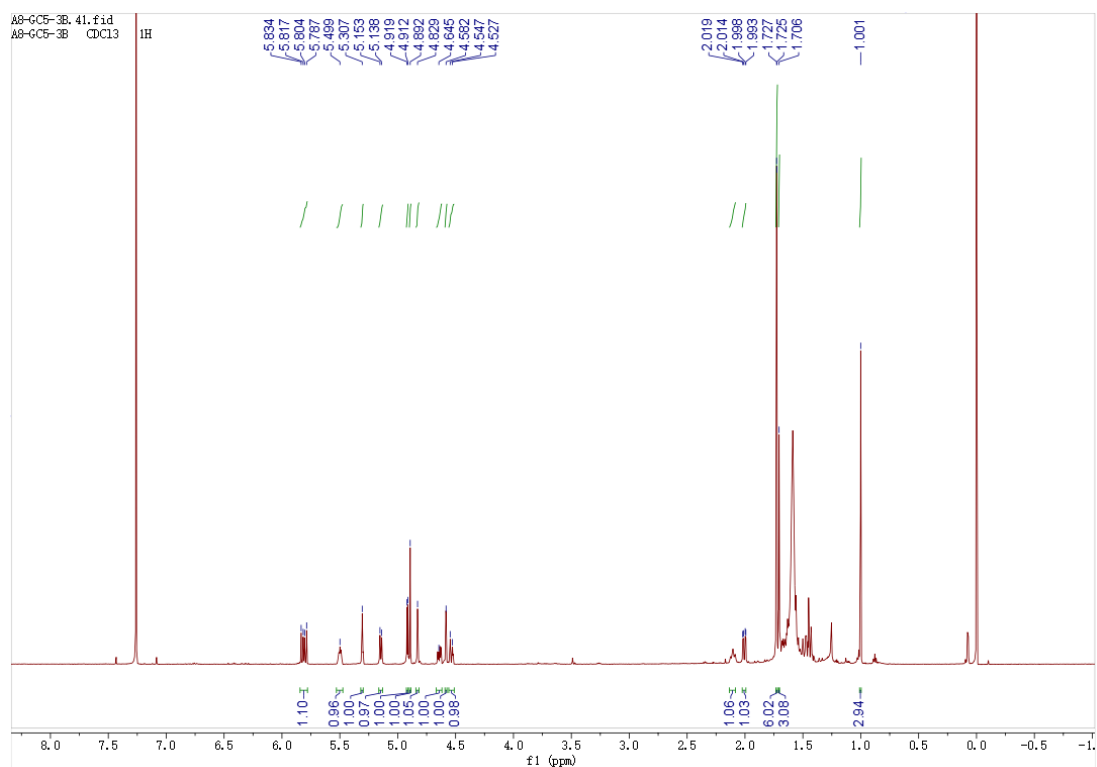

**Figure S51.** <sup>1</sup>H NMR spectrum of **9** (600MHz, CDCl<sub>3</sub>)

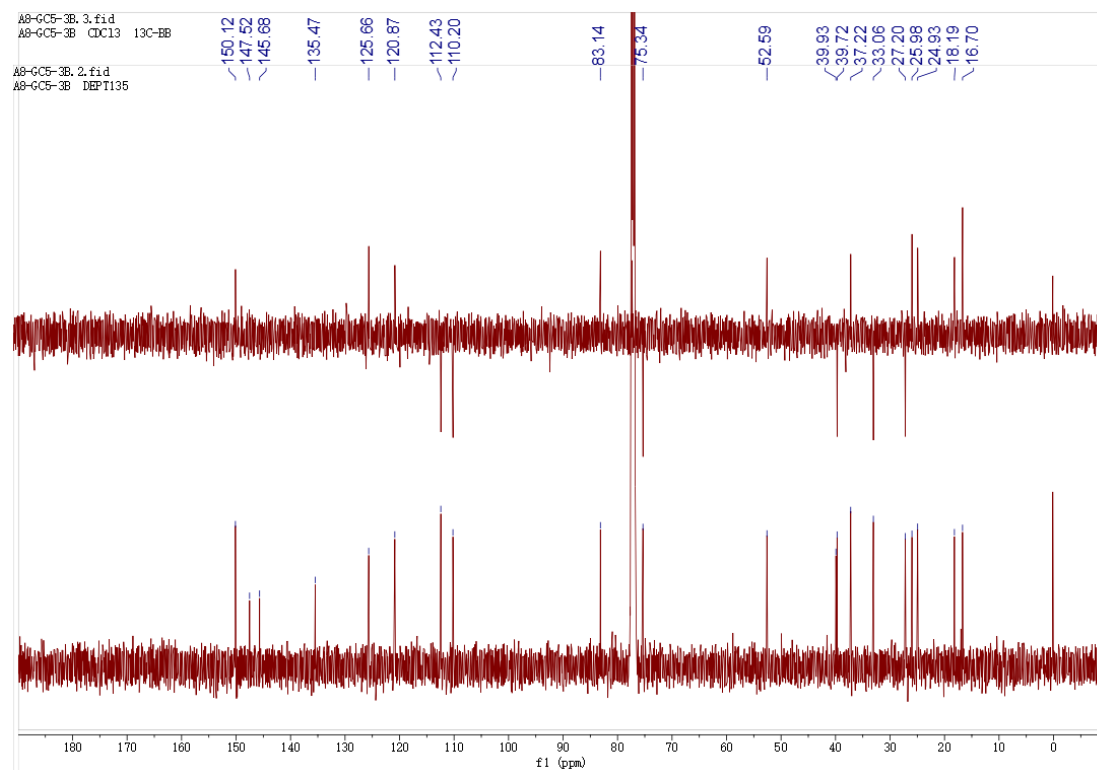

**Figure S52.** <sup>13</sup>C NMR spectrum of **9** (125 MHz, CDCl<sub>3</sub>)

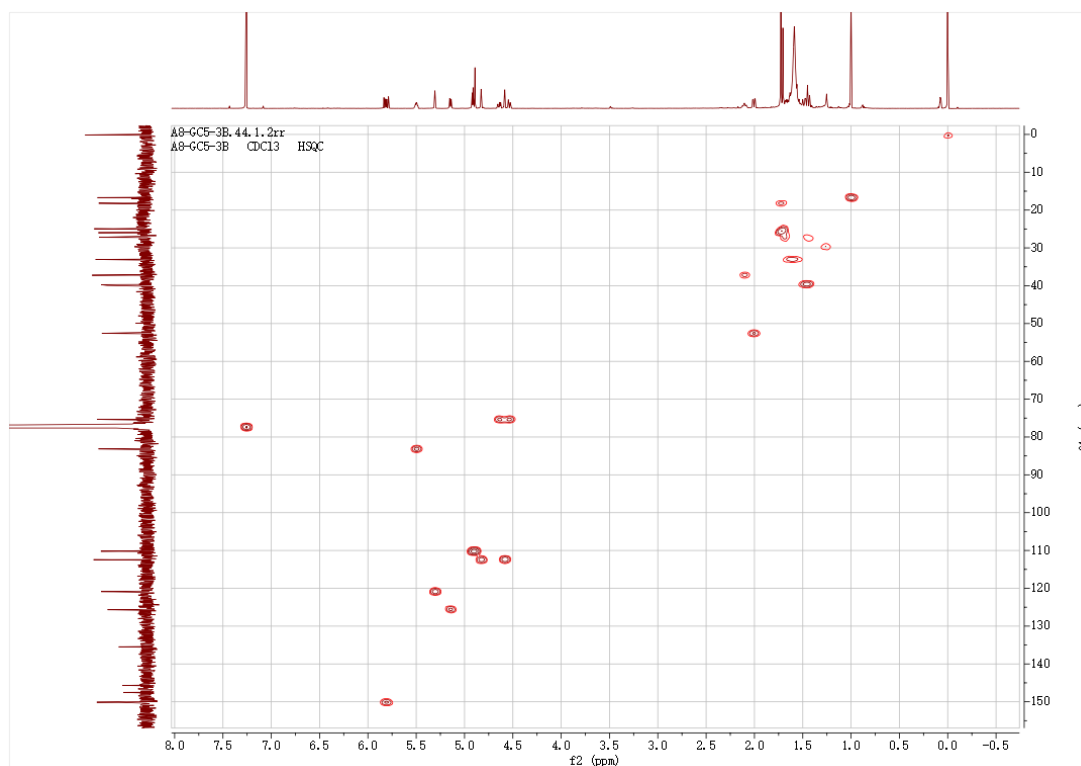

**Figure S53.** HSQC spectrum of **9** (600 MHz, CDCl<sub>3</sub>)

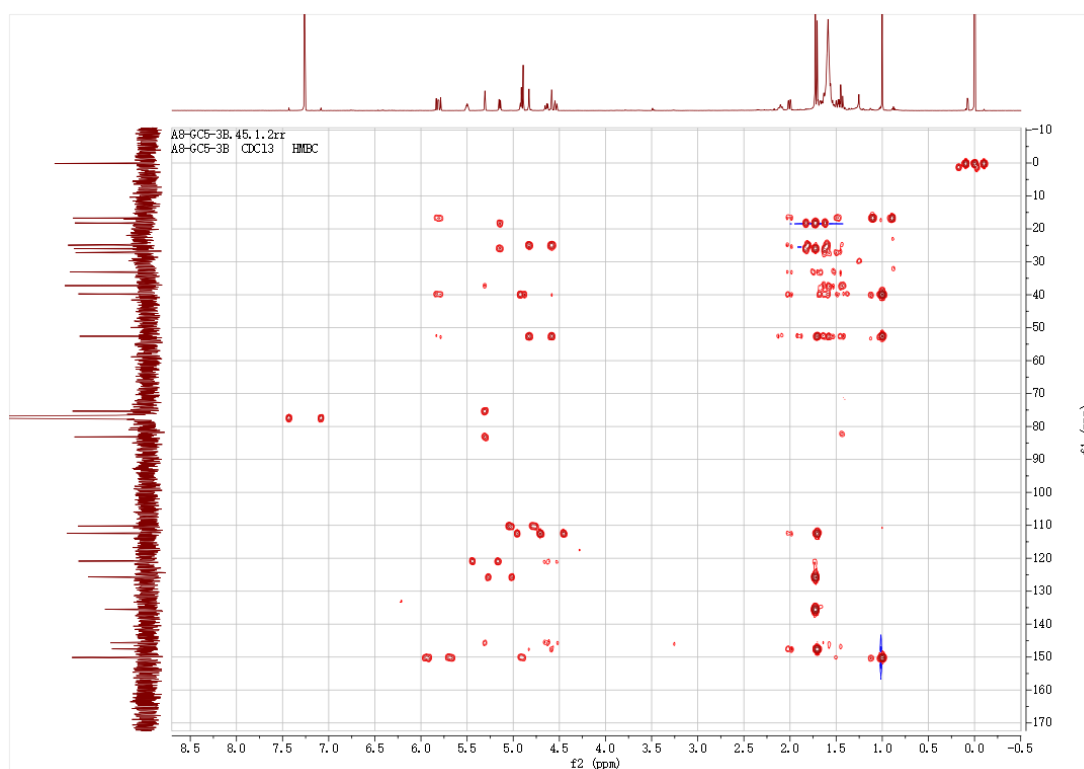

**Figure S54.** HMBC spectrum of **9** (600 MHz, CDCl<sub>3</sub>)

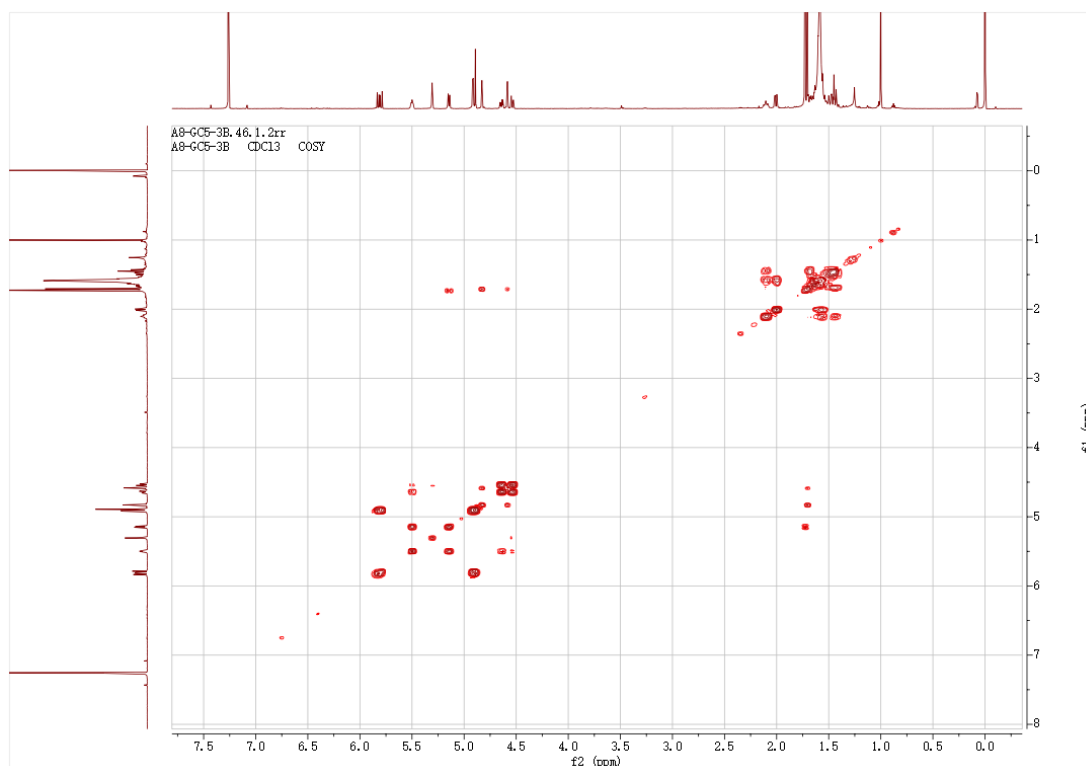

**Figure S55.**  $^1\text{H}$ - $^1\text{H}$  COSY spectrum of **9** (600 MHz,  $\text{CDCl}_3$ )

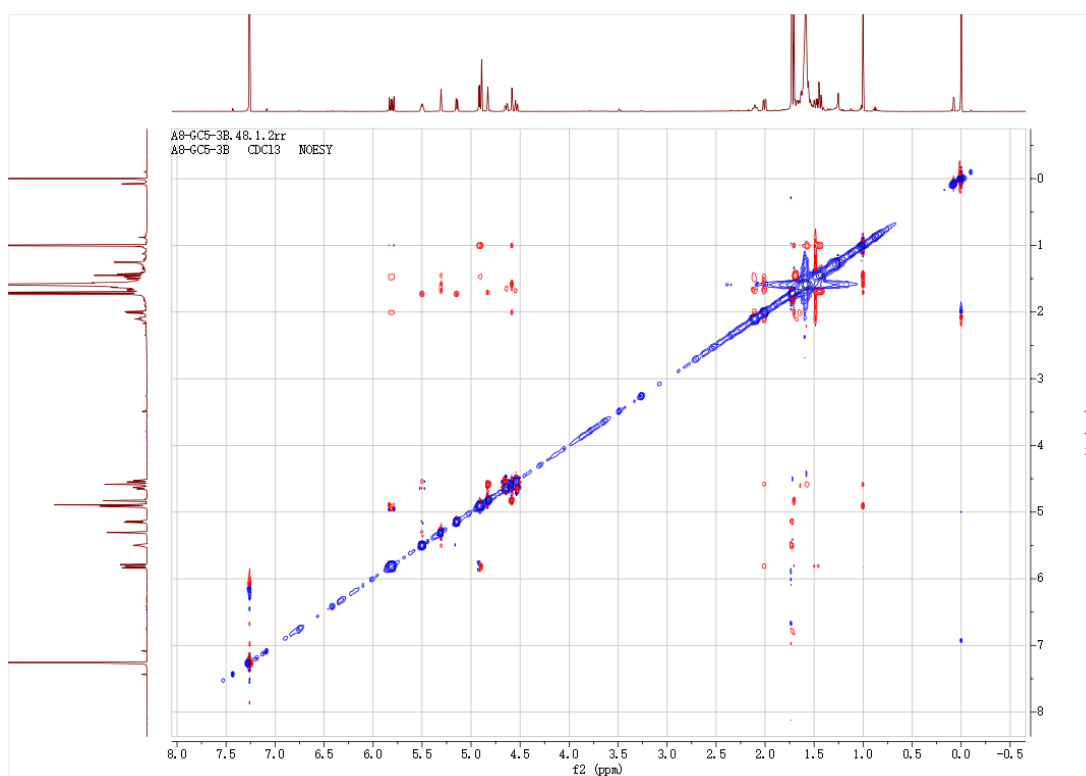

**Figure S56.** NOESY spectrum of **9** (600 MHz,  $\text{CDCl}_3$ )



EI202101751\_A8-GC5-3B -c1#5 RT: 0.83

T: + c EI Full ms [ 49.50-800.50]

m/z= 48-803

| m/z      | Intensity  | Relative | Theo. Mass | Delta (mmu) | RDB equiv. | Composition                                    |
|----------|------------|----------|------------|-------------|------------|------------------------------------------------|
| 115.0559 | 1243035.0  | 1.70     | 115.0542   | 1.72        | 6.5        | C <sub>9</sub> H <sub>7</sub>                  |
| 117.0700 | 1692654.0  | 2.31     | 117.0699   | 0.16        | 5.5        | C <sub>9</sub> H <sub>9</sub>                  |
| 119.0858 | 4363781.0  | 5.95     | 119.0855   | 0.29        | 4.5        | C <sub>9</sub> H <sub>11</sub>                 |
| 120.0926 | 1004185.0  | 1.37     | 120.0934   | -0.77       | 4.0        | C <sub>9</sub> H <sub>12</sub>                 |
| 121.0666 | 3271862.0  | 4.46     | 121.0648   | 1.85        | 4.5        | C <sub>8</sub> H <sub>9</sub> O <sub>1</sub>   |
| 121.1029 | 4869674.0  | 6.64     | 121.1012   | 1.72        | 3.5        | C <sub>9</sub> H <sub>13</sub>                 |
| 129.0727 | 1209233.0  | 1.65     | 129.0699   | 2.81        | 6.5        | C <sub>10</sub> H <sub>9</sub>                 |
| 131.0846 | 3008170.0  | 4.10     | 131.0855   | -0.90       | 5.5        | C <sub>10</sub> H <sub>11</sub>                |
| 163.1088 | 1405592.0  | 1.92     | 163.1117   | -2.93       | 4.5        | C <sub>11</sub> H <sub>15</sub> O <sub>1</sub> |
| 185.1328 | 961094.0   | 1.31     | 185.1325   | 0.28        | 6.5        | C <sub>14</sub> H <sub>17</sub>                |
| 187.1125 | 1451815.0  | 1.98     | 187.1117   | 0.71        | 6.5        | C <sub>13</sub> H <sub>15</sub> O <sub>1</sub> |
| 187.1487 | 2975158.0  | 4.06     | 187.1481   | 0.54        | 5.5        | C <sub>14</sub> H <sub>19</sub>                |
| 189.1275 | 2455728.0  | 3.35     | 189.1274   | 0.07        | 5.5        | C <sub>13</sub> H <sub>17</sub> O <sub>1</sub> |
| 190.1341 | 1046104.0  | 1.43     | 190.1352   | -1.12       | 5.0        | C <sub>13</sub> H <sub>18</sub> O <sub>1</sub> |
| 201.1271 | 4531159.0  | 6.18     | 201.1274   | -0.33       | 6.5        | C <sub>14</sub> H <sub>17</sub> O <sub>1</sub> |
| 201.1639 | 1104557.0  | 1.51     | 201.1638   | 0.12        | 5.5        | C <sub>15</sub> H <sub>21</sub>                |
| 202.1334 | 1760286.0  | 2.40     | 202.1352   | -1.77       | 6.0        | C <sub>14</sub> H <sub>18</sub> O <sub>1</sub> |
| 203.1428 | 3368857.0  | 4.60     | 203.1430   | -0.24       | 5.5        | C <sub>14</sub> H <sub>19</sub> O <sub>1</sub> |
| 205.1586 | 1191392.0  | 1.63     | 205.1587   | -0.08       | 4.5        | C <sub>14</sub> H <sub>21</sub> O <sub>1</sub> |
| 215.1430 | 3745532.0  | 5.11     | 215.1430   | -0.05       | 6.5        | C <sub>15</sub> H <sub>19</sub> O <sub>1</sub> |
| 216.1487 | 1480633.0  | 2.02     | 216.1509   | -2.19       | 6.0        | C <sub>15</sub> H <sub>20</sub> O <sub>1</sub> |
| 217.1590 | 12308992.0 | 16.79    | 217.1587   | 0.29        | 5.5        | C <sub>15</sub> H <sub>21</sub> O <sub>1</sub> |
| 229.1588 | 1458979.0  | 1.99     | 229.1587   | 0.11        | 6.5        | C <sub>16</sub> H <sub>21</sub> O <sub>1</sub> |
| 243.1744 | 3528118.0  | 4.81     | 243.1743   | 0.04        | 6.5        | C <sub>17</sub> H <sub>23</sub> O <sub>1</sub> |
| 257.1911 | 1261285.0  | 1.72     | 257.1900   | 1.14        | 6.5        | C <sub>18</sub> H <sub>25</sub> O <sub>1</sub> |
| 271.2056 | 73304064.0 | 100.00   | 271.2056   | -0.05       | 6.5        | C <sub>19</sub> H <sub>27</sub> O <sub>1</sub> |
| 284.2138 | 979916.0   | 1.34     | 284.2135   | 0.30        | 7.0        | C <sub>20</sub> H <sub>28</sub> O <sub>1</sub> |
| 285.2203 | 1427519.0  | 1.95     | 285.2213   | -1.04       | 6.5        | C <sub>20</sub> H <sub>29</sub> O <sub>1</sub> |
| 286.2288 | 2825975.0  | 3.86     | 286.2291   | -0.27       | 6.0        | C <sub>20</sub> H <sub>30</sub> O <sub>1</sub> |

Figure S57. HREIMS spectrum of **9**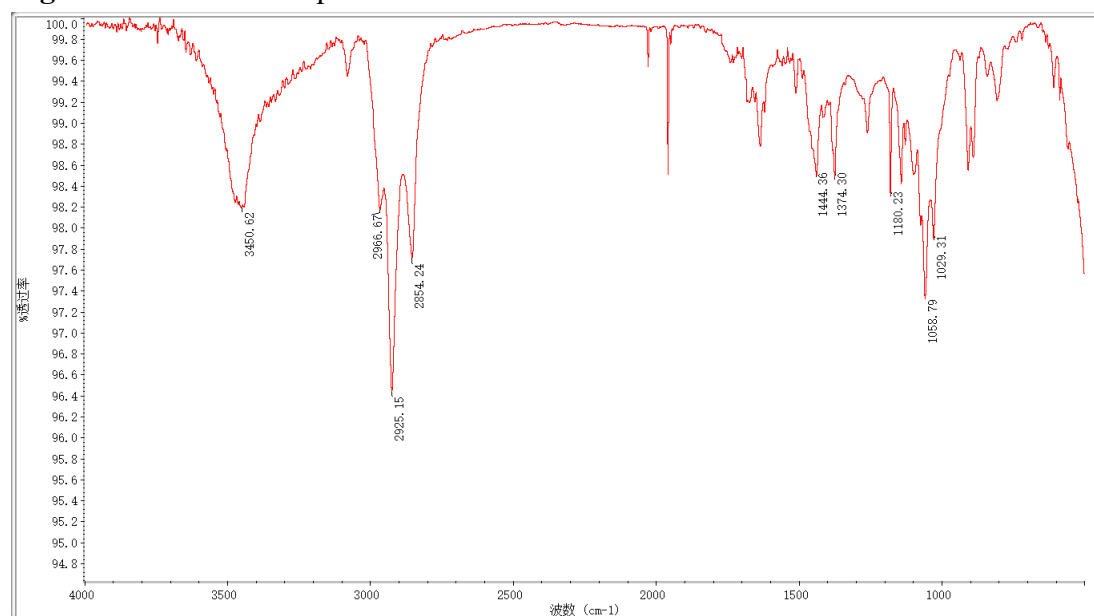Figure S58. UV and CD spectrum of **9**

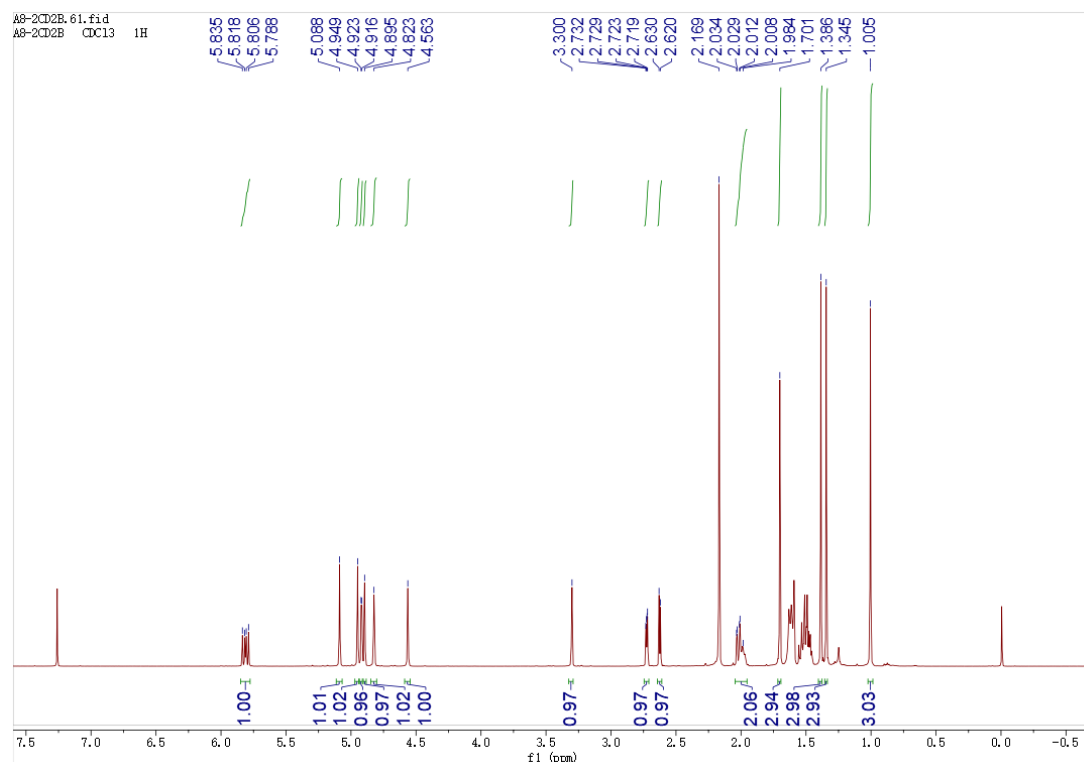

**Figure S59.** <sup>1</sup>H NMR spectrum of **10** (600MHz, CDCl<sub>3</sub>)

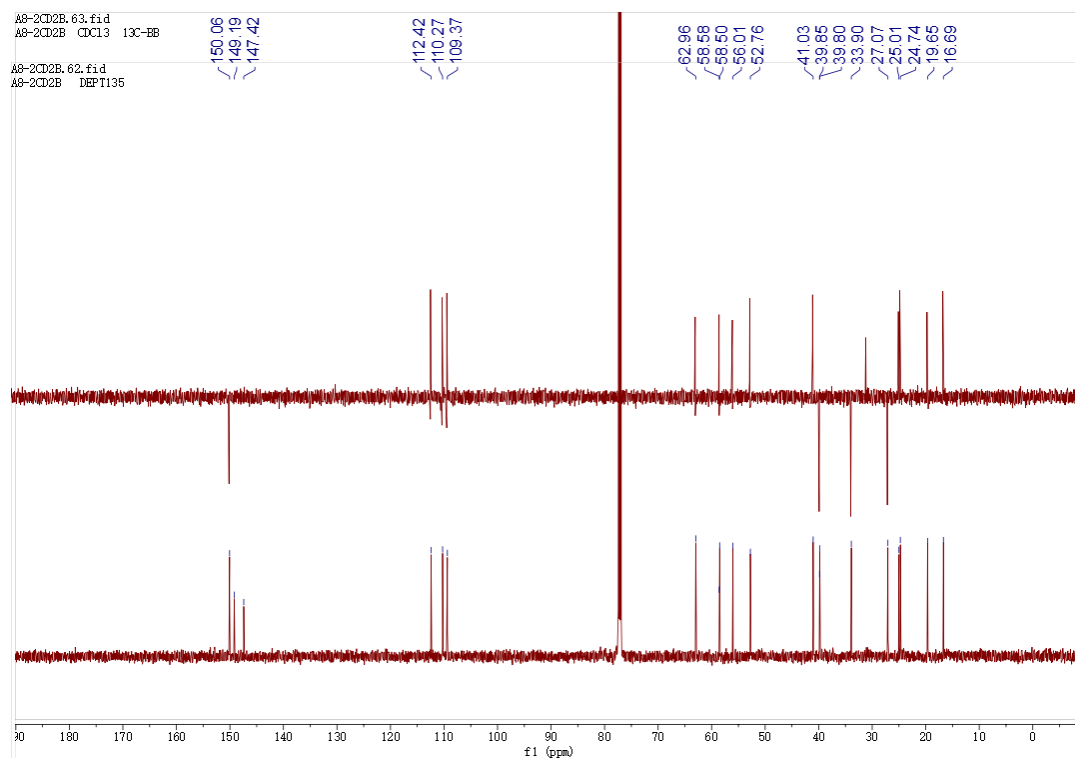

**Figure S60.** <sup>13</sup>C NMR spectrum of **10** (125 MHz, CDCl<sub>3</sub>)

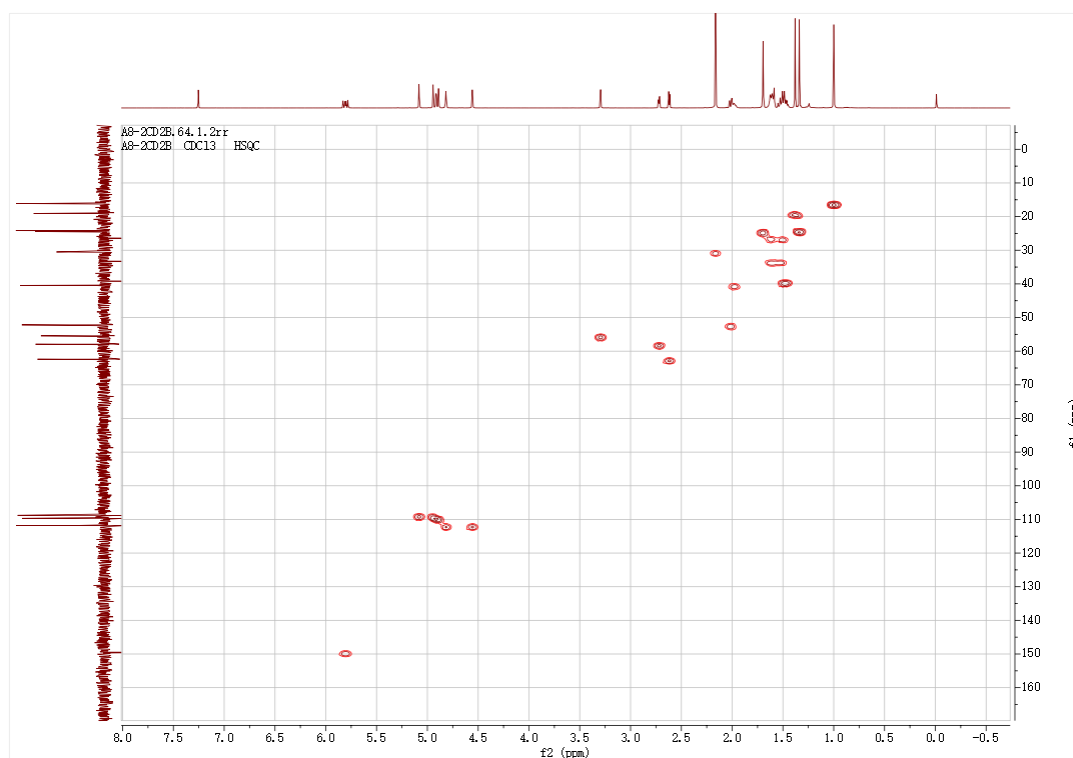

**Figure S61.** HSQC spectrum of **10** (600 MHz, CDCl<sub>3</sub>)

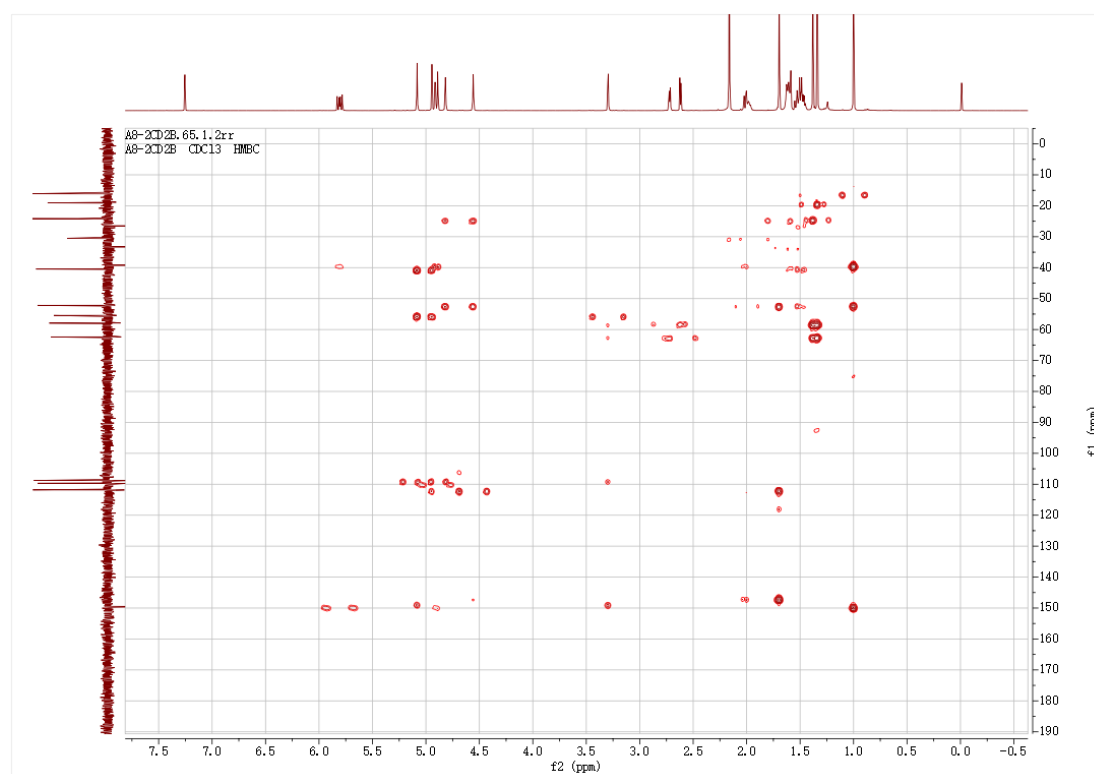

**Figure S62.** HMBC spectrum of **10** (600 MHz, CDCl<sub>3</sub>)

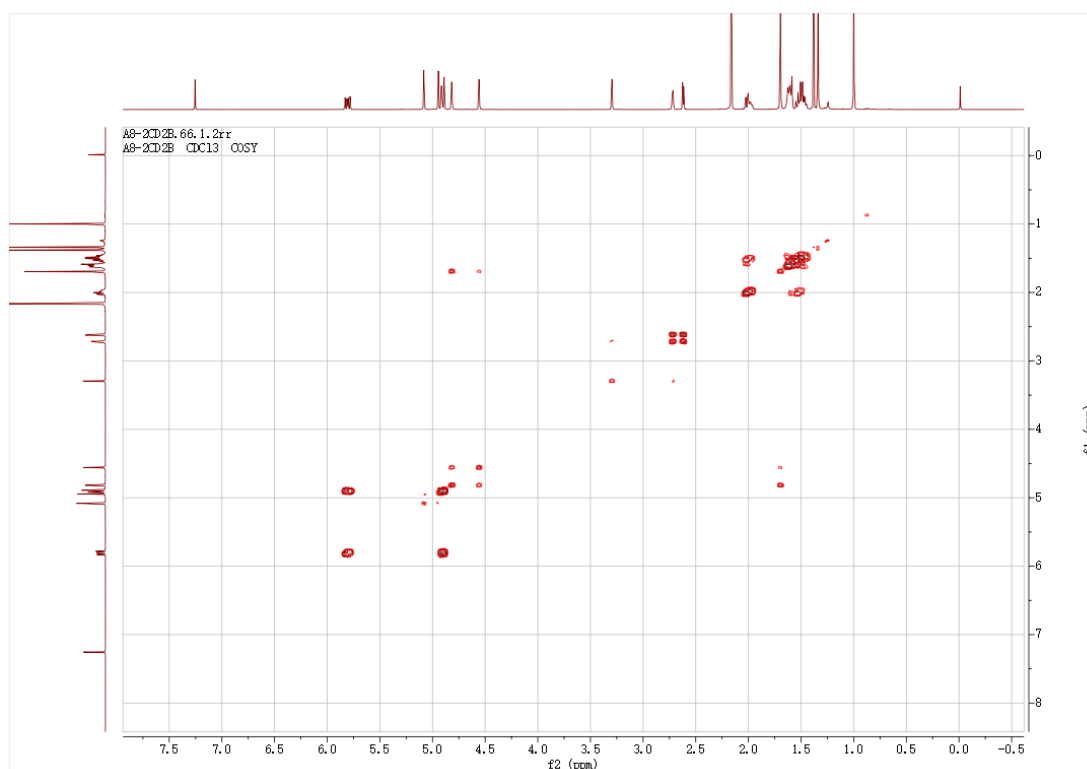

**Figure S63.**  $^1\text{H}$ - $^1\text{H}$  COSY spectrum of **10** (600 MHz,  $\text{CDCl}_3$ )

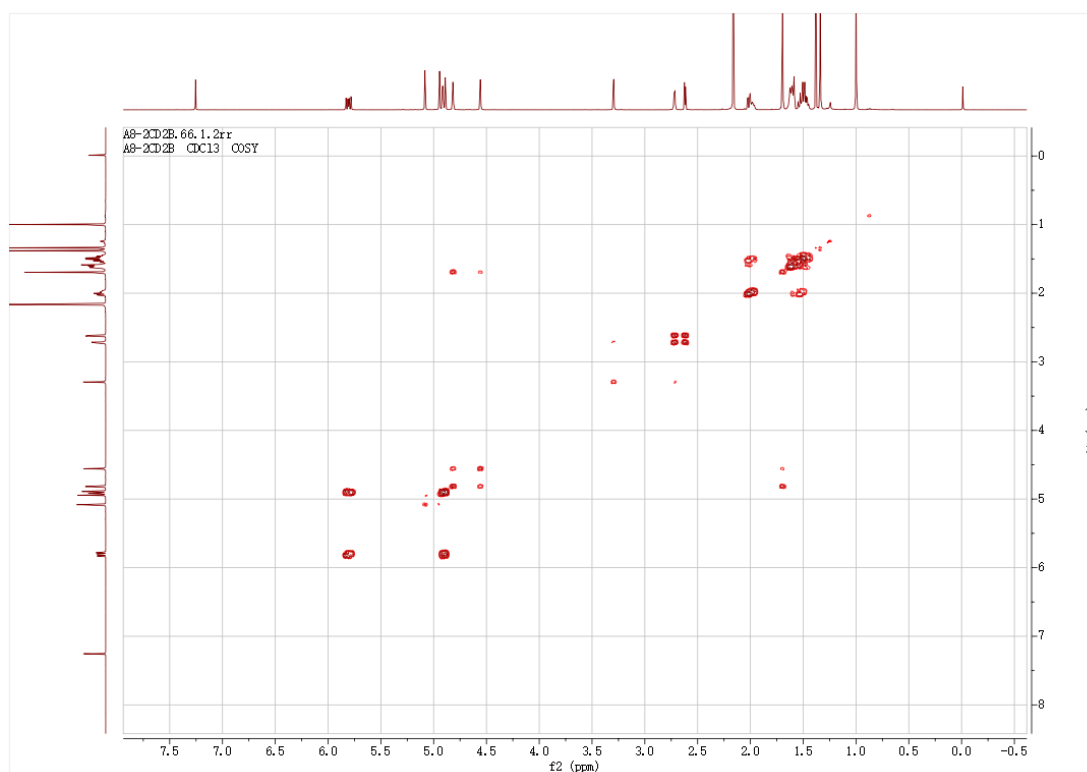

**Figure S64.** NOESY spectrum of **10** (600 MHz,  $\text{CDCl}_3$ )

## Qualitative Analysis Report

|                 |                                        |                        |                             |
|-----------------|----------------------------------------|------------------------|-----------------------------|
| Data Filename   | ESI202103081.d                         | Sample Name            | A8-A8-1CB5-2                |
| Sample ID       |                                        | Position               | P1-C5                       |
| Instrument Name | Agilent G6520 Q-TOF                    | Acq Method             | 20160322_MS_ESIH_POS_1min.m |
| Acquired Time   | 6/17/2021 19:08:05                     | IRM Calibration Status | Success                     |
| DA Method       | small molecular data analysis method.m | Comment                | ESIH by zhuzhenyun          |

### User Spectra

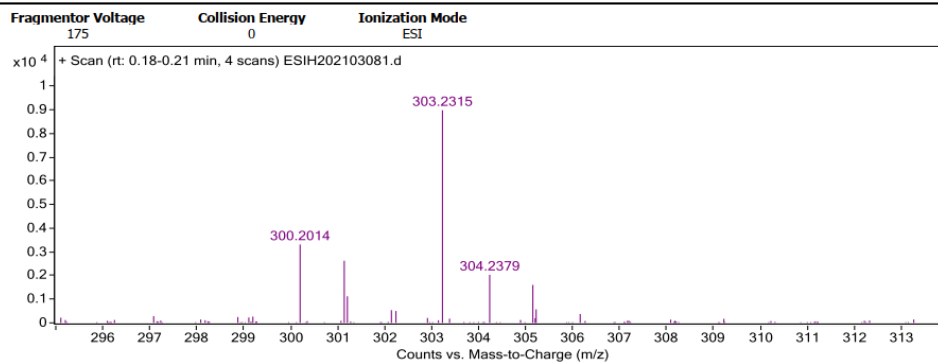

### Formula Calculator Results

| m/z      | Calc m/z | Diff (mDa) | Diff (ppm) | Ion Formula | Ion    |
|----------|----------|------------|------------|-------------|--------|
| 303.2315 | 303.2319 | 0.35       | 1.14       | C20 H31 O2  | (M+H)+ |

--- End Of Report ---

**Figure S65. HRESIMS spectrum of 10**

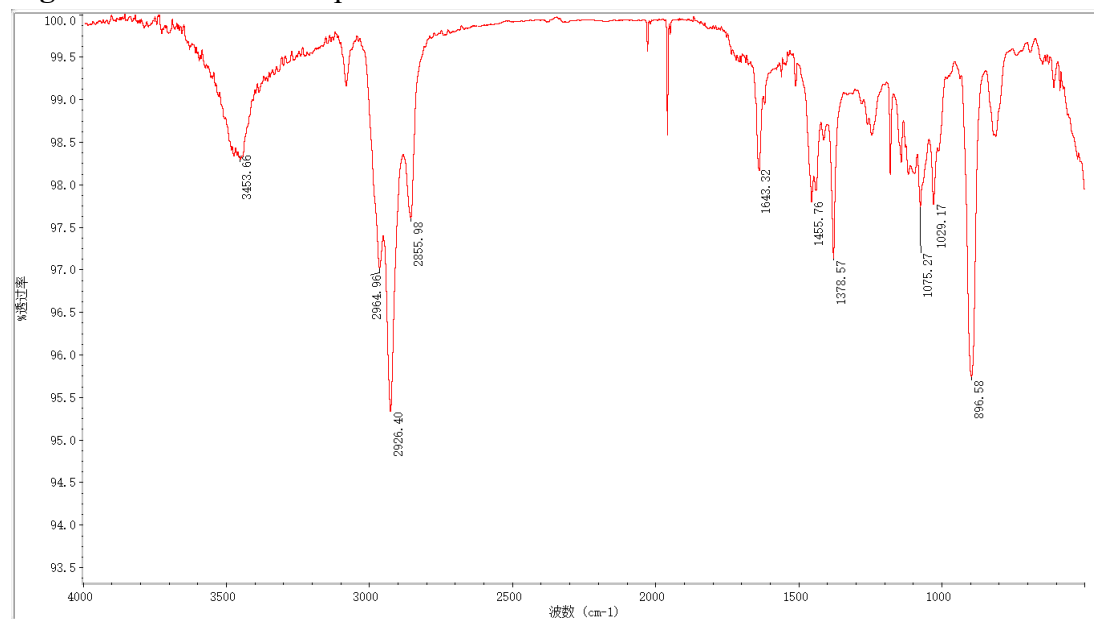

**Figure S66. IR spectrum of 10**

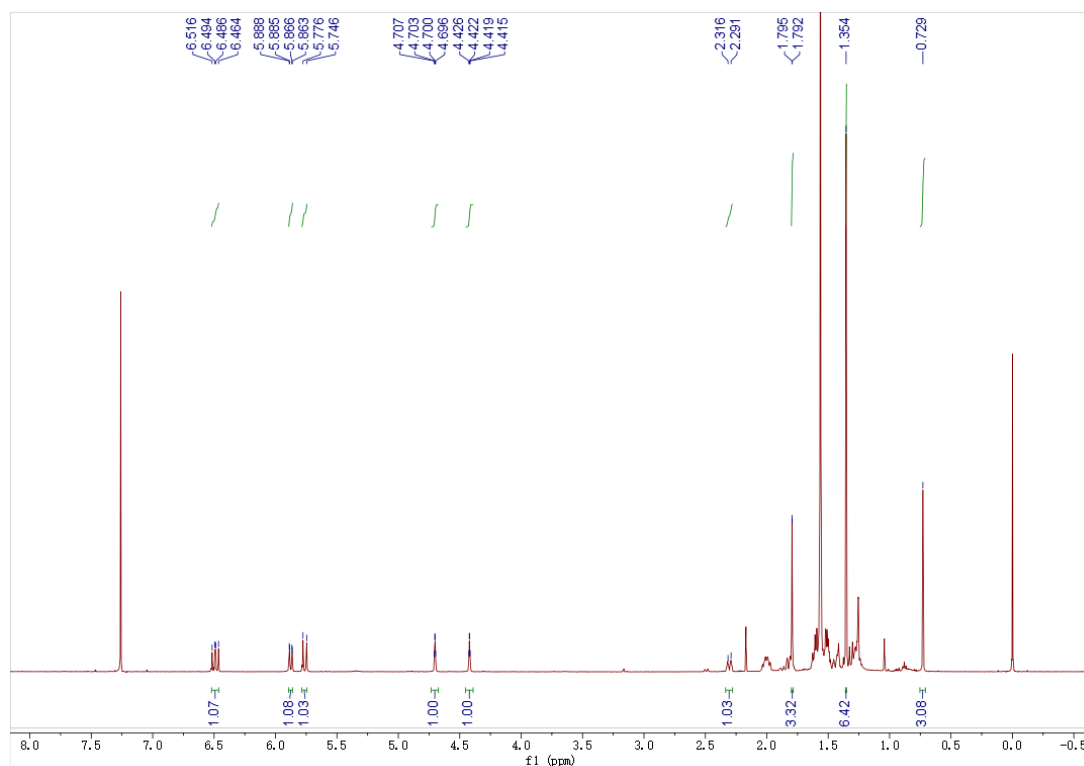

**Figure S67.**  $^1\text{H}$  NMR spectrum of **11** (600MHz,  $\text{CDCl}_3$ )

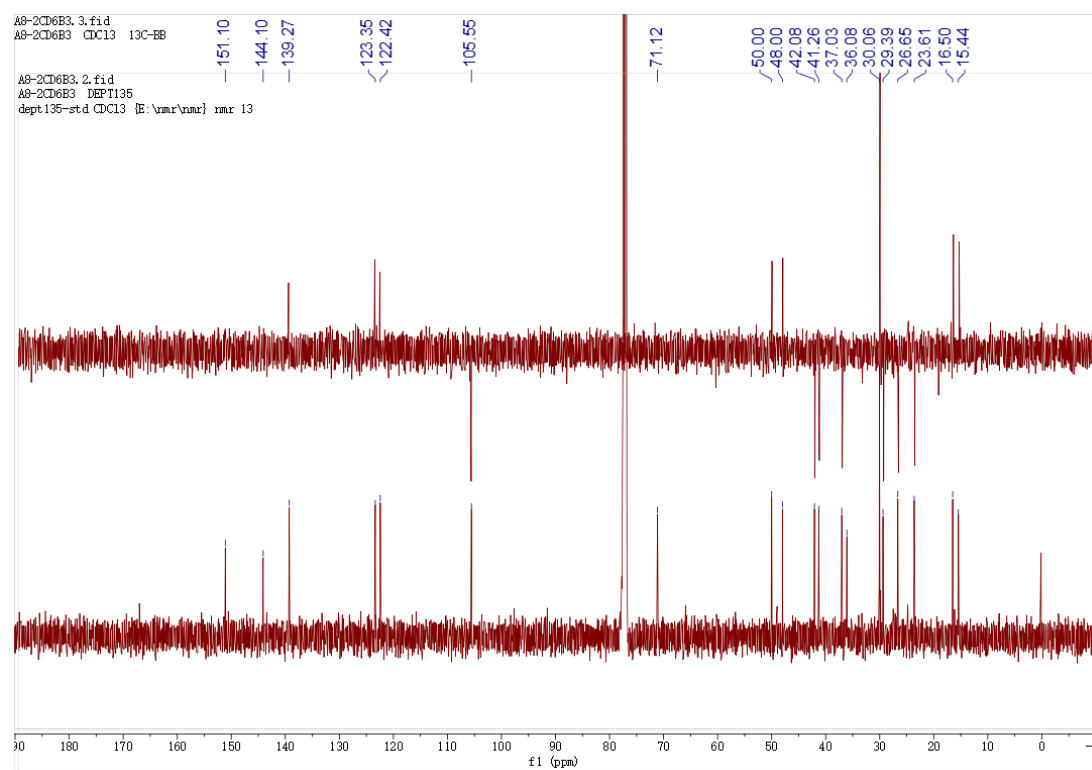

**Figure S68.**  $^{13}\text{C}$  NMR spectrum of **11** (125 MHz,  $\text{CDCl}_3$ )

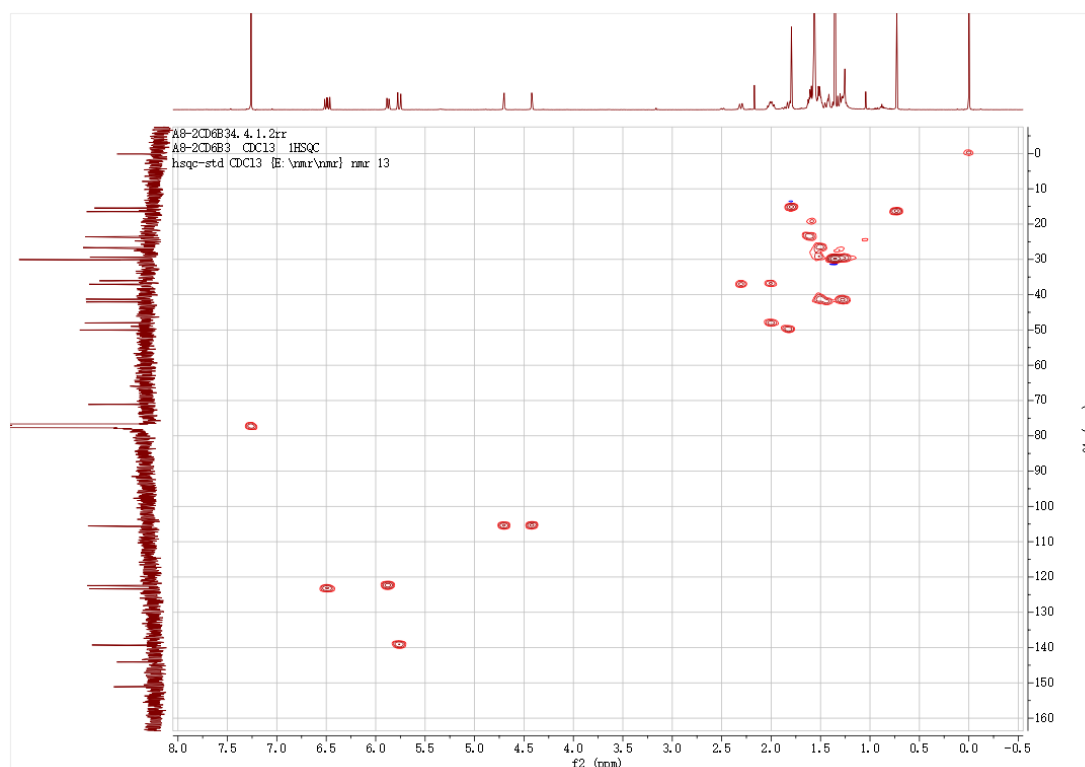

**Figure S69.** HSQC spectrum of **11** (600 MHz,  $\text{CDCl}_3$ )

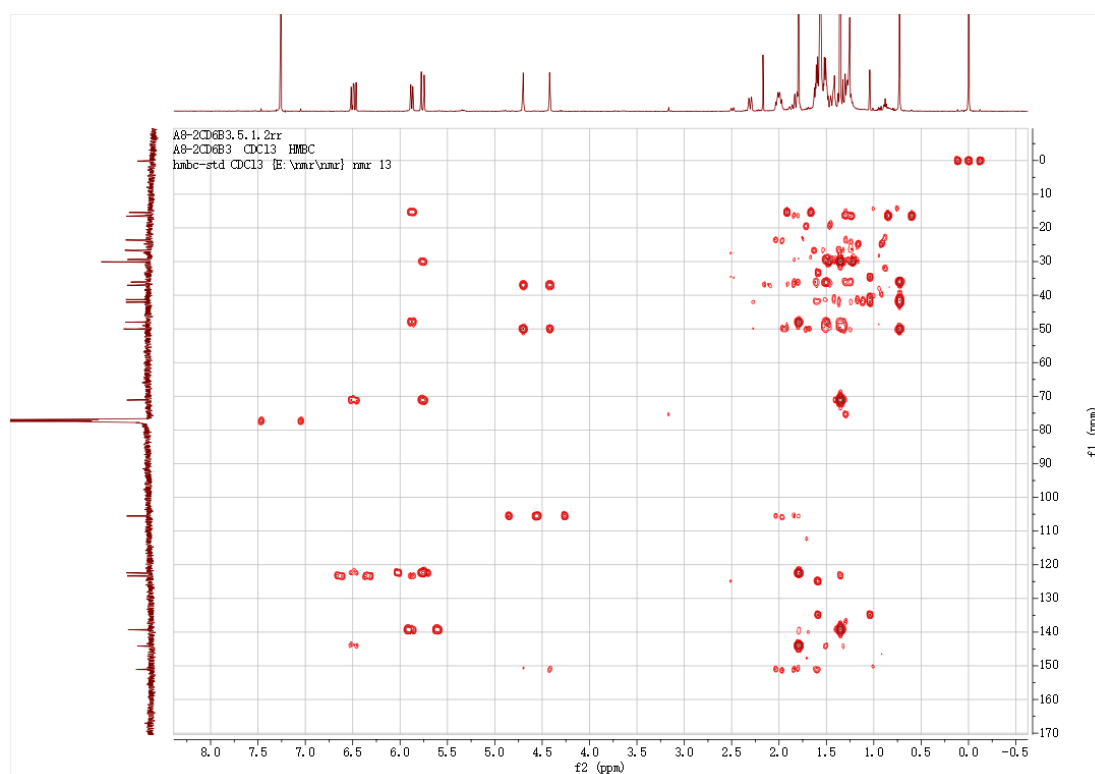

**Figure S70.** HMBC spectrum of **11** (600 MHz,  $\text{CDCl}_3$ )

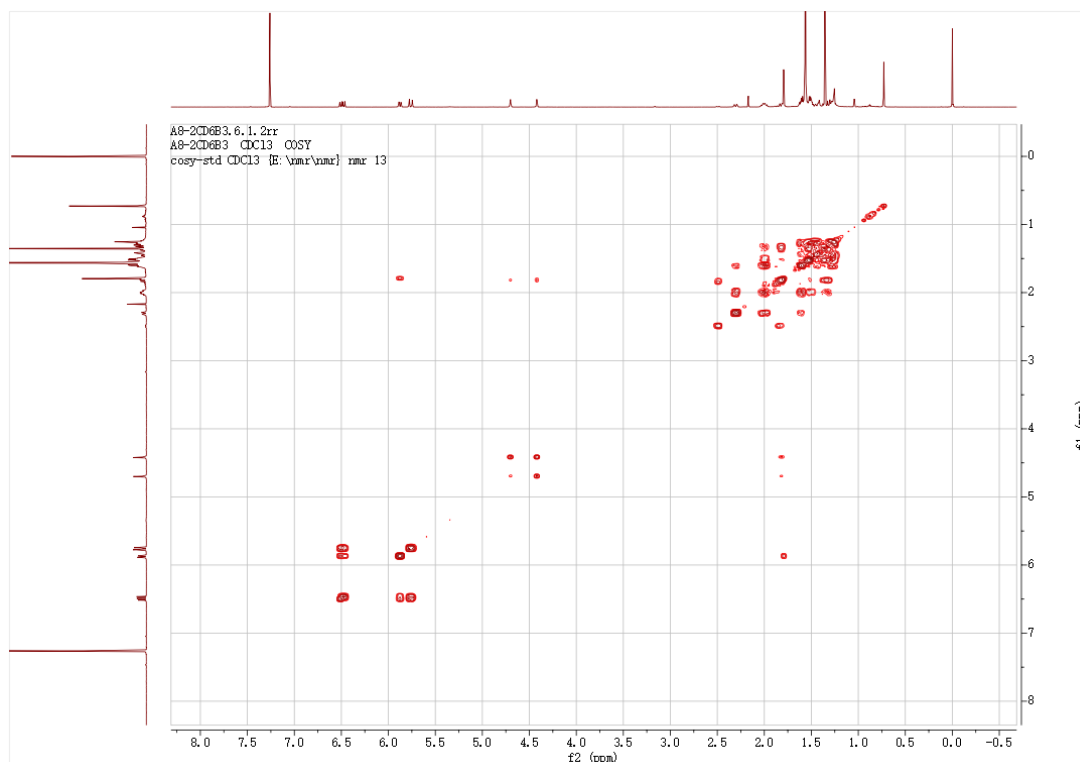

**Figure S71.**  $^1\text{H}$ - $^1\text{H}$  COSY spectrum of **11** (600 MHz,  $\text{CDCl}_3$ )

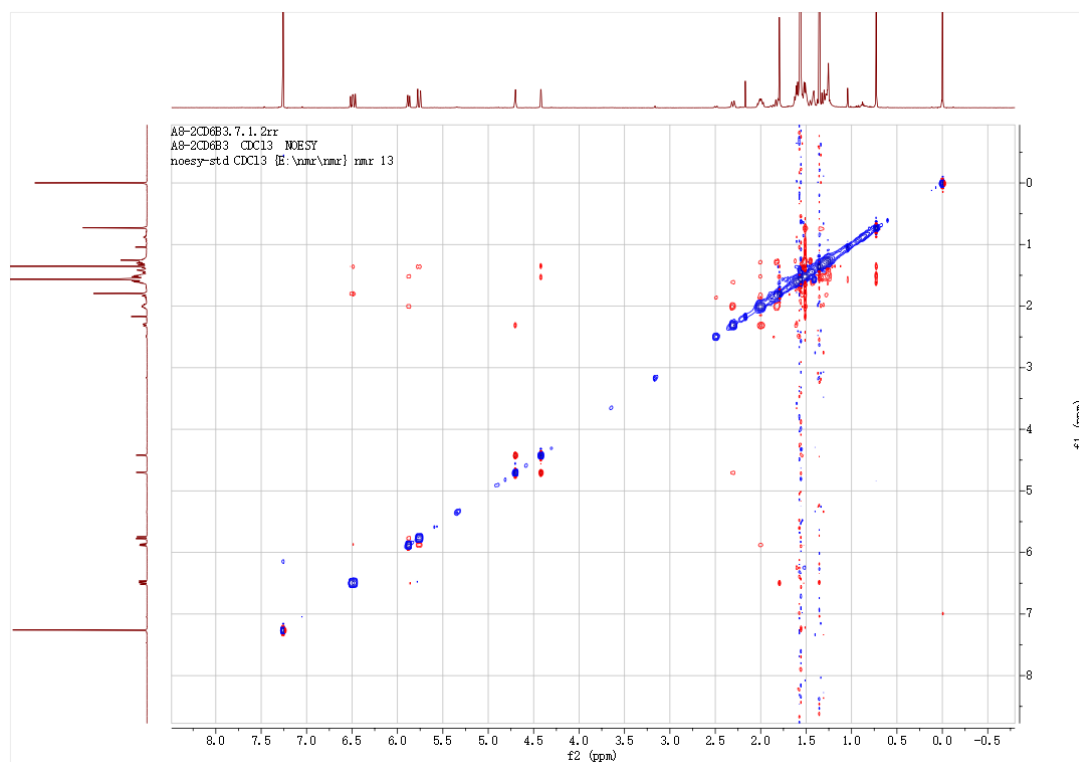

**Figure S72.** NOESY spectrum of **11** (600 MHz,  $\text{CDCl}_3$ )



EI202101757 A8-2CD6B3 -c1#7 RT: 1.24

T: + c EI Full ms [ 49.50-800.50]

m/z= 48-803

| m/z      | Intensity  | Relative | Theo. Mass | Delta (mmu) | RDB equiv. | Composition                                    |
|----------|------------|----------|------------|-------------|------------|------------------------------------------------|
| 69.0696  | 2159378.0  | 10.91    | 69.0699    | -0.28       | 1.5        | C <sub>5</sub> H <sub>9</sub>                  |
| 79.0177  | 5271272.0  | 26.64    | 79.0178    | -0.11       | 4.5        | C <sub>5</sub> H <sub>8</sub> O <sub>1</sub>   |
| 80.0239  | 1806400.0  | 9.13     | 80.0257    | -1.77       | 4.0        | C <sub>5</sub> H <sub>4</sub> O <sub>1</sub>   |
| 81.0312  | 6581477.0  | 33.26    | 81.0335    | -2.30       | 3.5        | C <sub>5</sub> H <sub>5</sub> O <sub>1</sub>   |
| 93.0702  | 8451328.0  | 42.71    | 93.0699    | 0.35        | 3.5        | C <sub>7</sub> H <sub>9</sub>                  |
| 95.0878  | 8269501.0  | 41.79    | 95.0855    | 2.29        | 2.5        | C <sub>7</sub> H <sub>11</sub>                 |
| 105.0361 | 7764670.0  | 39.24    | 105.0335   | 2.61        | 5.5        | C <sub>7</sub> H <sub>8</sub> O <sub>1</sub>   |
| 111.0212 | 4003476.0  | 20.23    | 111.0229   | -1.74       | 8.5        | C <sub>9</sub> H <sub>9</sub>                  |
| 119.0858 | 6925085.0  | 35.00    | 119.0855   | 0.28        | 4.5        | C <sub>9</sub> H <sub>11</sub>                 |
| 131.0856 | 2796667.0  | 14.13    | 131.0855   | 0.12        | 5.5        | C <sub>10</sub> H <sub>11</sub>                |
| 133.1014 | 8804864.0  | 44.50    | 133.1012   | 0.18        | 4.5        | C <sub>10</sub> H <sub>13</sub>                |
| 134.1076 | 2902759.0  | 14.67    | 134.1090   | -1.40       | 4.0        | C <sub>10</sub> H <sub>14</sub>                |
| 135.1166 | 3465007.0  | 17.51    | 135.1168   | -0.22       | 3.5        | C <sub>10</sub> H <sub>15</sub>                |
| 145.1010 | 4440810.0  | 22.44    | 145.1012   | -0.15       | 5.5        | C <sub>11</sub> H <sub>13</sub>                |
| 147.1167 | 13904640.0 | 70.27    | 147.1168   | -0.17       | 4.5        | C <sub>11</sub> H <sub>15</sub>                |
| 148.1221 | 3253231.0  | 16.44    | 148.1247   | -2.53       | 4.0        | C <sub>11</sub> H <sub>16</sub>                |
| 149.1315 | 2609460.0  | 13.19    | 149.1325   | -0.99       | 3.5        | C <sub>11</sub> H <sub>17</sub>                |
| 159.1147 | 4436779.0  | 22.42    | 159.1168   | -2.14       | 5.5        | C <sub>12</sub> H <sub>15</sub>                |
| 160.1219 | 2032857.0  | 10.27    | 160.1247   | -2.73       | 5.0        | C <sub>12</sub> H <sub>16</sub>                |
| 161.1305 | 14538752.0 | 73.47    | 161.1325   | -1.97       | 4.5        | C <sub>12</sub> H <sub>17</sub>                |
| 162.1380 | 11487232.0 | 58.05    | 162.1403   | -2.31       | 4.0        | C <sub>12</sub> H <sub>18</sub>                |
| 163.1452 | 3687488.0  | 18.63    | 163.1481   | -2.93       | 3.5        | C <sub>12</sub> H <sub>19</sub>                |
| 173.1324 | 3984464.0  | 20.14    | 173.1325   | -0.12       | 5.5        | C <sub>13</sub> H <sub>17</sub>                |
| 175.1479 | 3621926.0  | 18.30    | 175.1481   | -0.21       | 4.5        | C <sub>13</sub> H <sub>19</sub>                |
| 187.1482 | 3997293.0  | 20.20    | 187.1481   | 0.11        | 5.5        | C <sub>14</sub> H <sub>19</sub>                |
| 188.1552 | 3067359.0  | 15.50    | 188.1560   | -0.77       | 5.0        | C <sub>14</sub> H <sub>20</sub>                |
| 189.1633 | 19788288.0 | 100.00   | 189.1638   | -0.51       | 4.5        | C <sub>14</sub> H <sub>21</sub>                |
| 199.1476 | 2196013.0  | 11.10    | 199.1481   | -0.54       | 6.5        | C <sub>15</sub> H <sub>19</sub>                |
| 201.1635 | 6774948.0  | 34.24    | 201.1638   | -0.26       | 5.5        | C <sub>15</sub> H <sub>21</sub>                |
| 215.1779 | 4036843.0  | 20.40    | 215.1794   | -1.50       | 5.5        | C <sub>16</sub> H <sub>23</sub>                |
| 216.1857 | 10152704.0 | 51.31    | 216.1873   | -1.55       | 5.0        | C <sub>16</sub> H <sub>24</sub>                |
| 227.1796 | 2300580.0  | 11.63    | 227.1794   | 0.15        | 6.5        | C <sub>17</sub> H <sub>23</sub>                |
| 255.2101 | 6456835.0  | 32.63    | 255.2107   | -0.61       | 6.5        | C <sub>19</sub> H <sub>27</sub>                |
| 270.2343 | 6491346.0  | 32.80    | 270.2342   | 0.10        | 6.0        | C <sub>20</sub> H <sub>30</sub>                |
| 271.2398 | 2065761.0  | 10.44    | 271.2420   | -2.23       | 5.5        | C <sub>20</sub> H <sub>31</sub>                |
| 273.2213 | 7769219.0  | 39.26    | 273.2213   | -0.01       | 5.5        | C <sub>19</sub> H <sub>29</sub> O <sub>1</sub> |
| 288.2443 | 19262976.0 | 97.35    | 288.2448   | -0.47       | 5.0        | C <sub>20</sub> H <sub>32</sub> O <sub>1</sub> |

Figure S73. HREIMS spectrum of 11

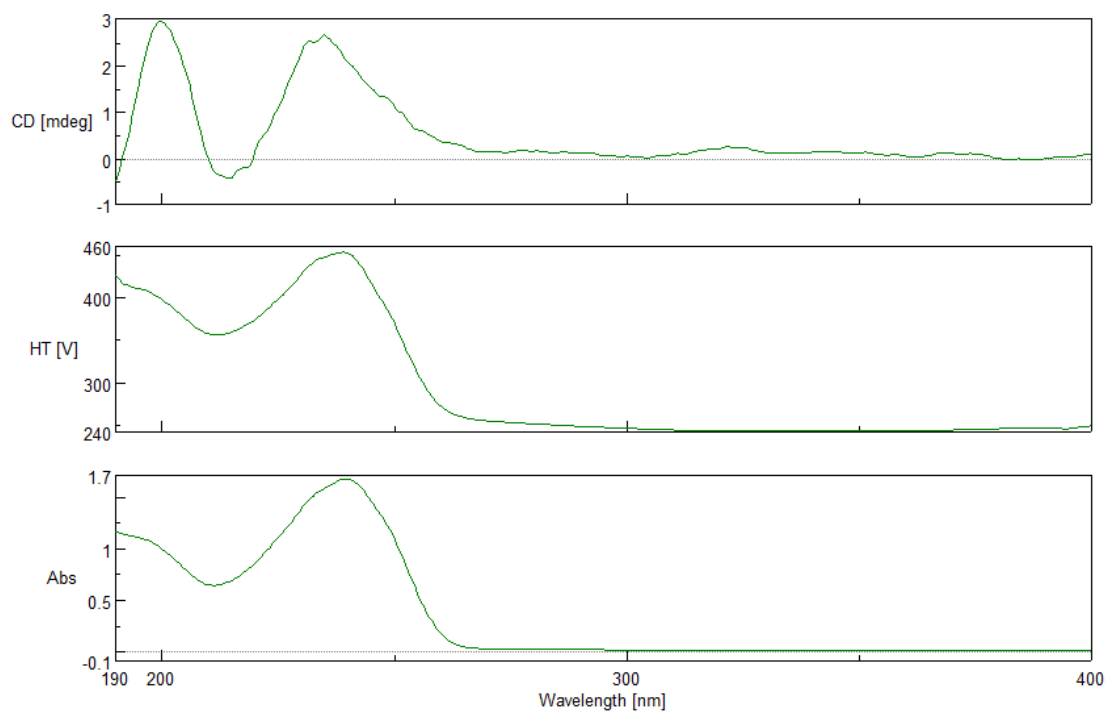

Figure S74. UV and CD spectrum of 11

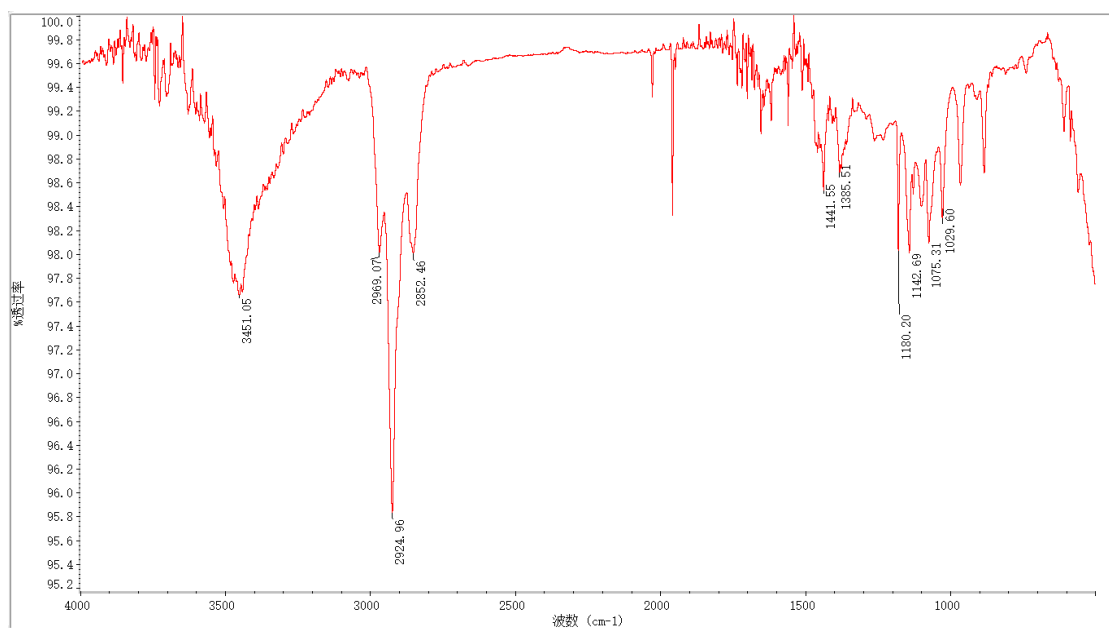

**Figure S75.** IR spectrum of **11**

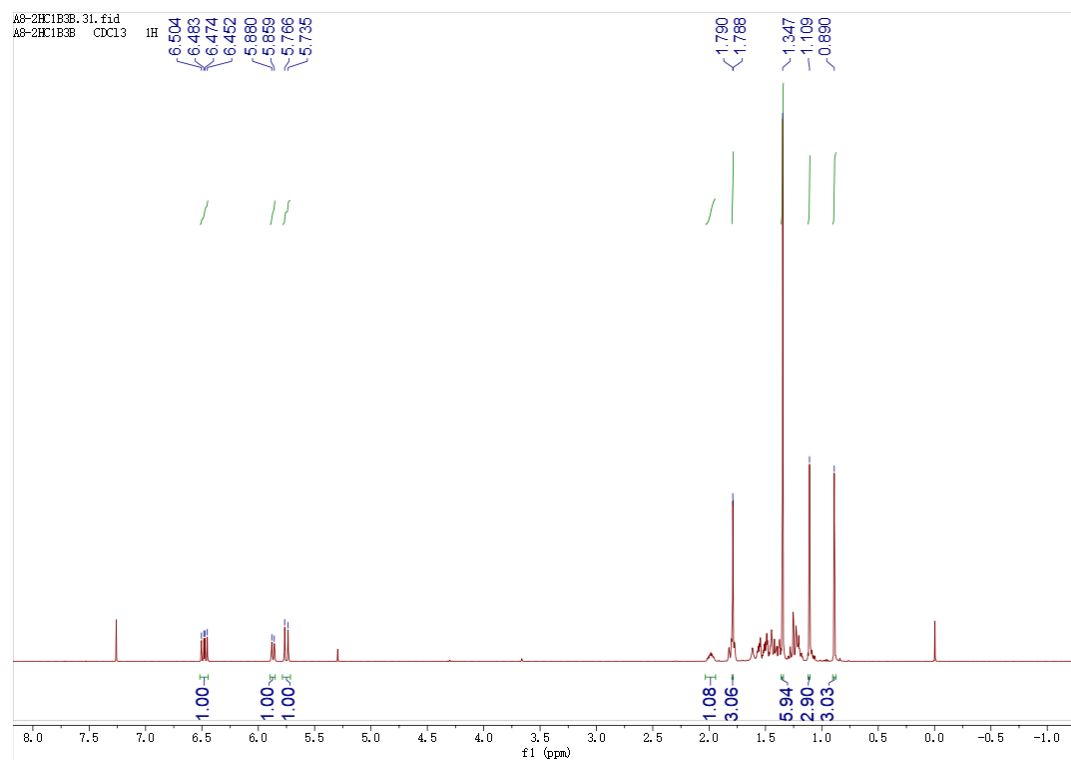

**Figure S76.** <sup>1</sup>H NMR spectrum of **12** (600MHz, CDCl<sub>3</sub>)

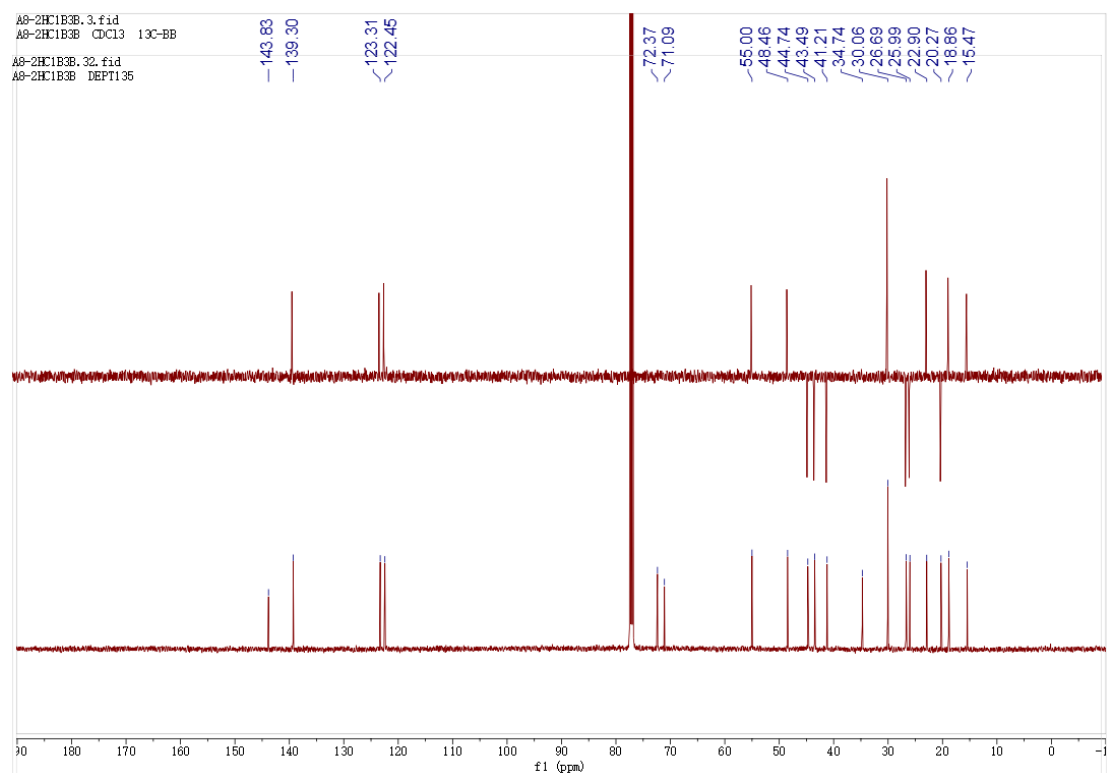

**Figure S77.** <sup>13</sup>C NMR spectrum of **12** (125 MHz, CDCl<sub>3</sub>)

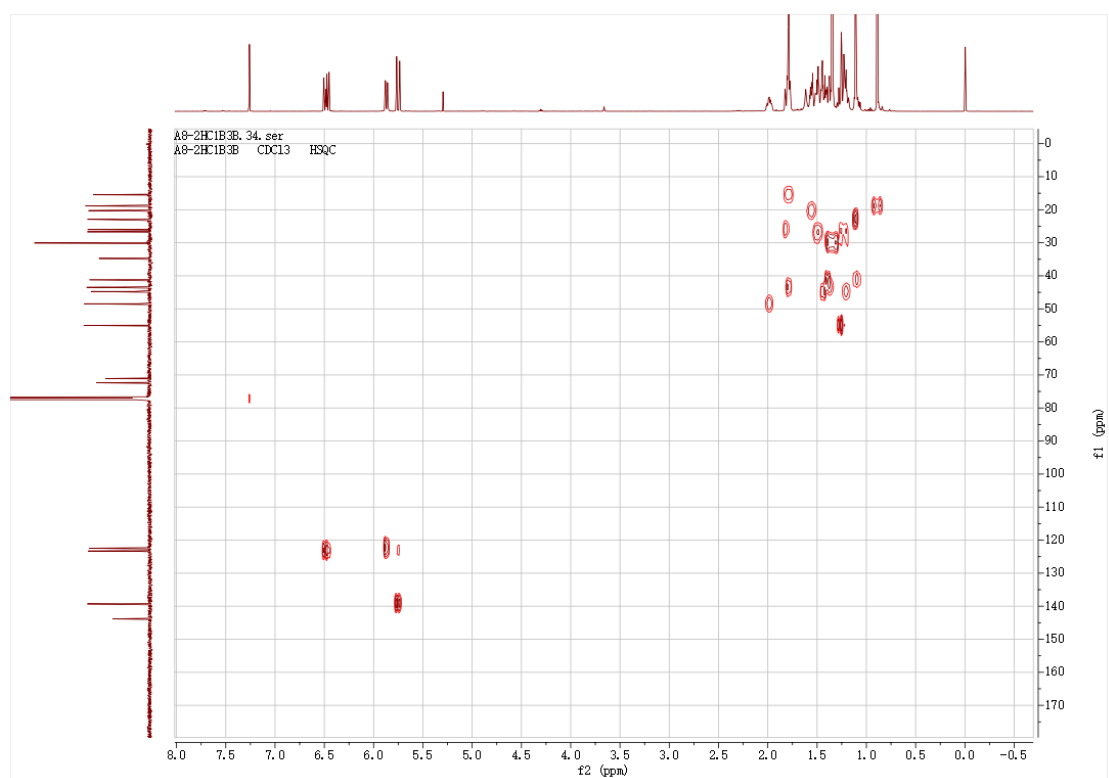

**Figure S78.** HSQC spectrum of **12** (600 MHz, CDCl<sub>3</sub>)

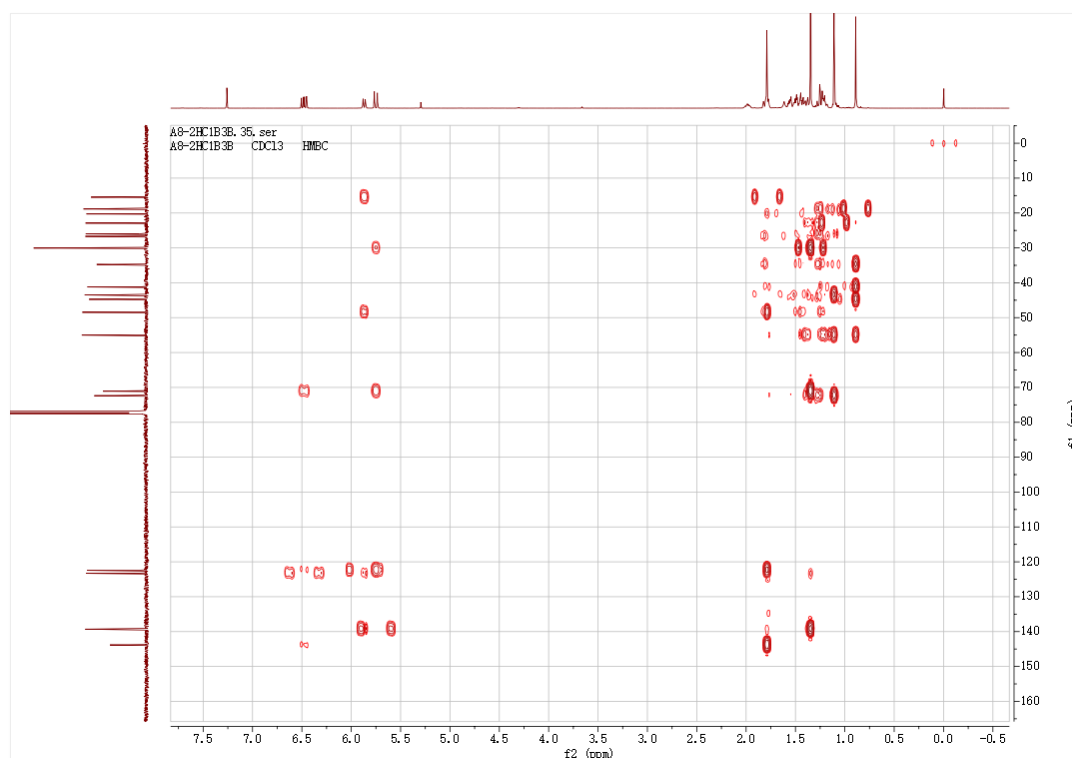

**Figure S79.** HMBC spectrum of **12** (600 MHz, CDCl<sub>3</sub>)

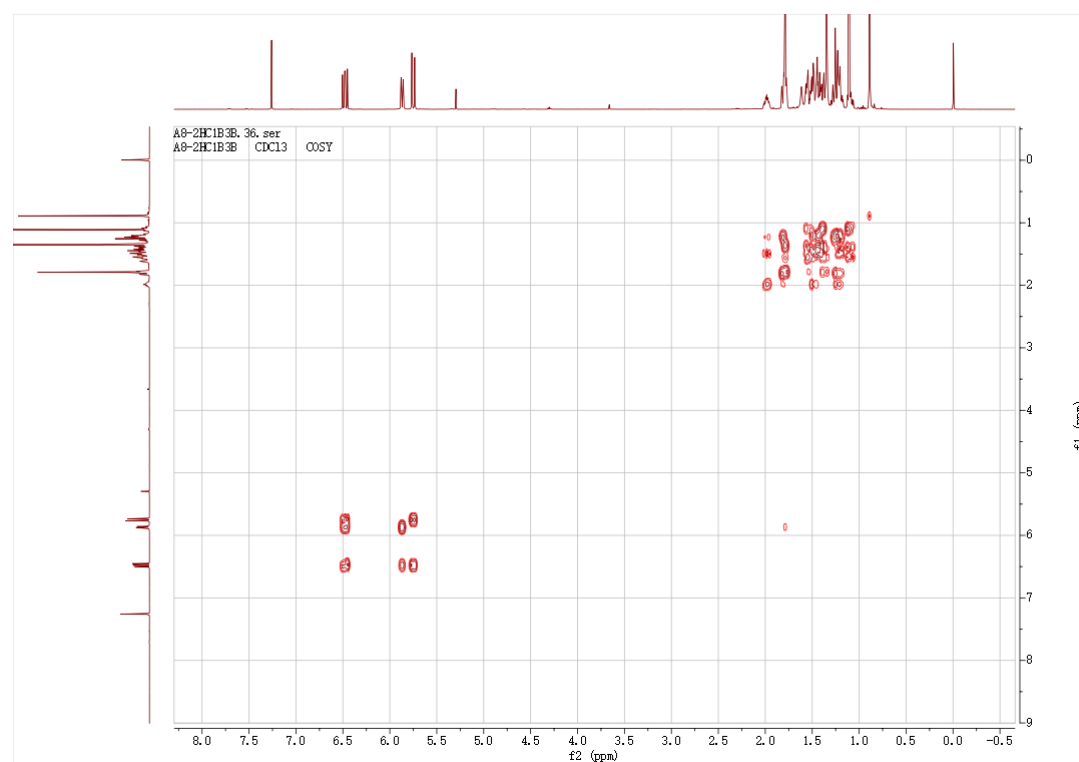

**Figure S80.** <sup>1</sup>H–<sup>1</sup>H COSY spectrum of **12** (600 MHz, CDCl<sub>3</sub>)

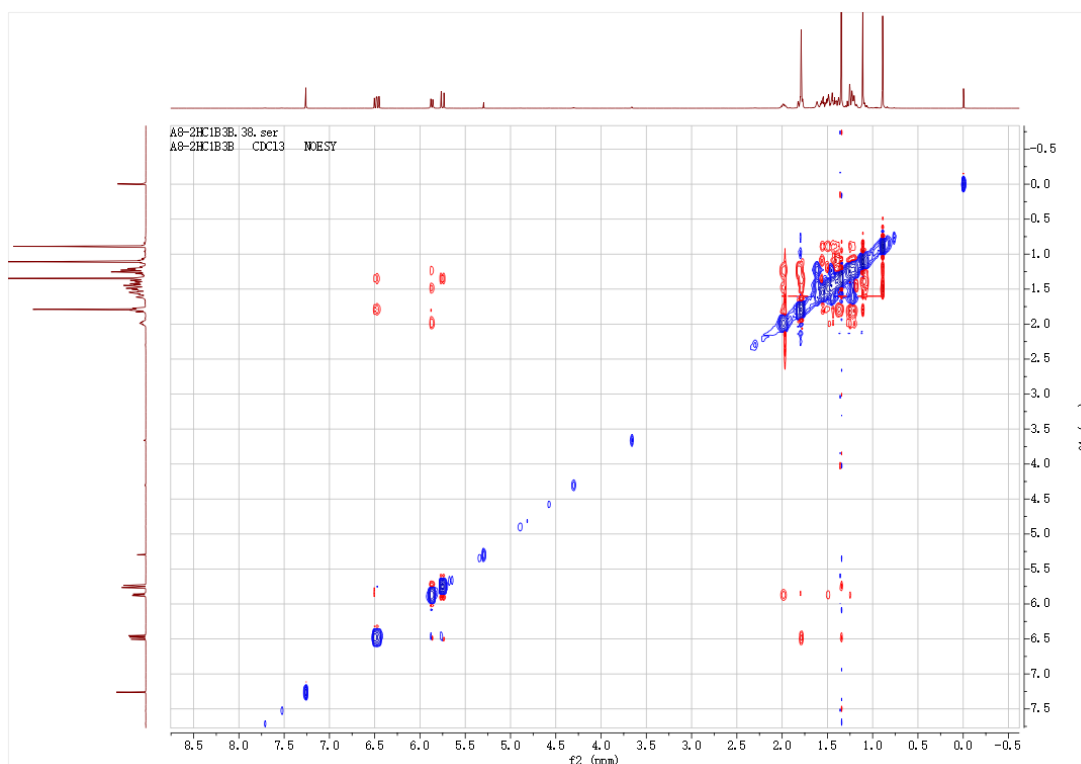

**Figure S81.** NOESY spectrum of **12** (600 MHz, CDCl<sub>3</sub>)

D:\data\2021\EI202101774\_-A8-2HC1B3B -c1

10/20/2021 12:29:00 PM

EI202101774\_-A8-2HC1B3B -c1#14 RT: 2.68

T: + c EI Full ms [ 49.50-800.50]

m/z= 48-803

| m/z      | Intensity | Relative | Theo.<br>Mass | Delta<br>(mmu) | RDB<br>equiv. | Composition                                    |
|----------|-----------|----------|---------------|----------------|---------------|------------------------------------------------|
| 59.0103  | 2524197.0 | 10.65    | 59.0128       | -2.42          | 1.5           | C <sub>2</sub> H <sub>3</sub> O <sub>2</sub>   |
| 162.0071 | 4810107.0 | 20.30    | 162.0100      | -2.93          | 12.0          | C <sub>12</sub> H <sub>2</sub> O <sub>1</sub>  |
| 176.9954 | 1557874.0 | 6.58     | 176.9971      | -1.73          | 12.5          | C <sub>12</sub> H <sub>1</sub> O <sub>2</sub>  |
| 245.2269 | 6149729.0 | 25.96    | 245.2264      | 0.57           | 4.5           | C <sub>18</sub> H <sub>29</sub>                |
| 255.2113 | 2755052.0 | 11.63    | 255.2107      | 0.61           | 6.5           | C <sub>19</sub> H <sub>27</sub>                |
| 270.2337 | 1391885.0 | 5.87     | 270.2342      | -0.46          | 6.0           | C <sub>20</sub> H <sub>30</sub>                |
| 273.2204 | 5979248.0 | 25.24    | 273.2213      | -0.87          | 5.5           | C <sub>19</sub> H <sub>29</sub> O <sub>1</sub> |
| 288.2453 | 6068558.0 | 25.61    | 288.2448      | 0.55           | 5.0           | C <sub>20</sub> H <sub>32</sub> O <sub>1</sub> |
| 289.2497 | 1726042.0 | 7.29     | 289.2526      | -2.88          | 4.5           | C <sub>20</sub> H <sub>33</sub> O <sub>1</sub> |
| 306.2553 | 3863438.0 | 16.31    | 306.2553      | -0.08          | 4.0           | C <sub>20</sub> H <sub>34</sub> O <sub>2</sub> |

**Figure S82.** HREIMS spectrum of **12**

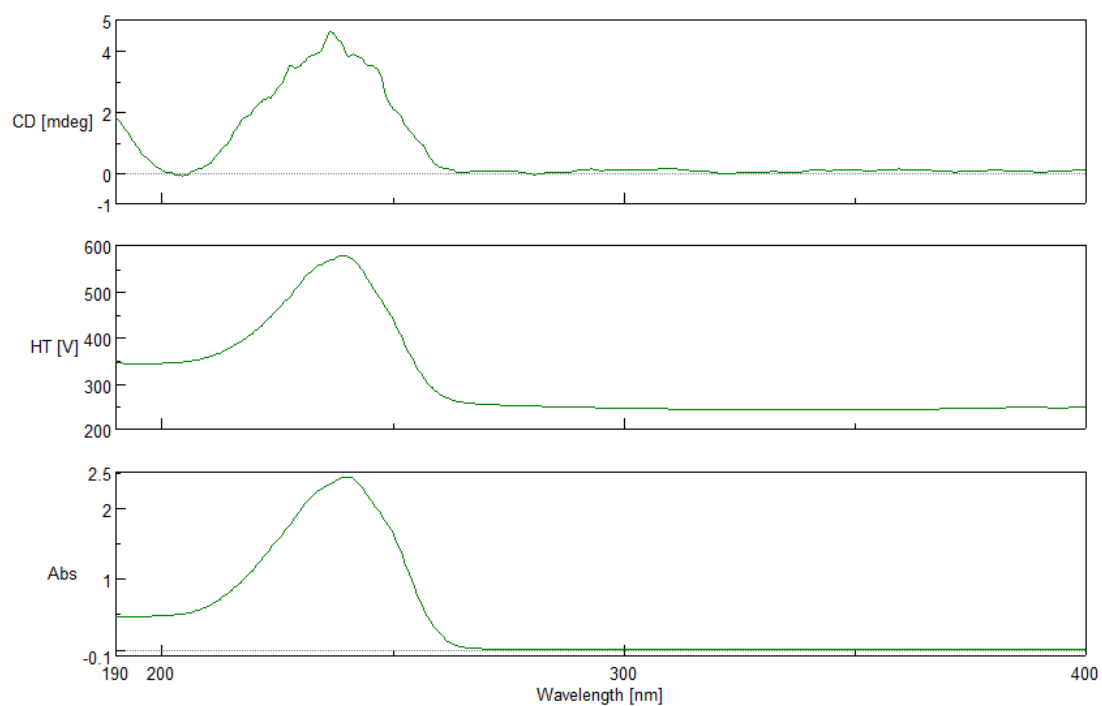

**Figure S83.** UV and CD spectrum of **12**

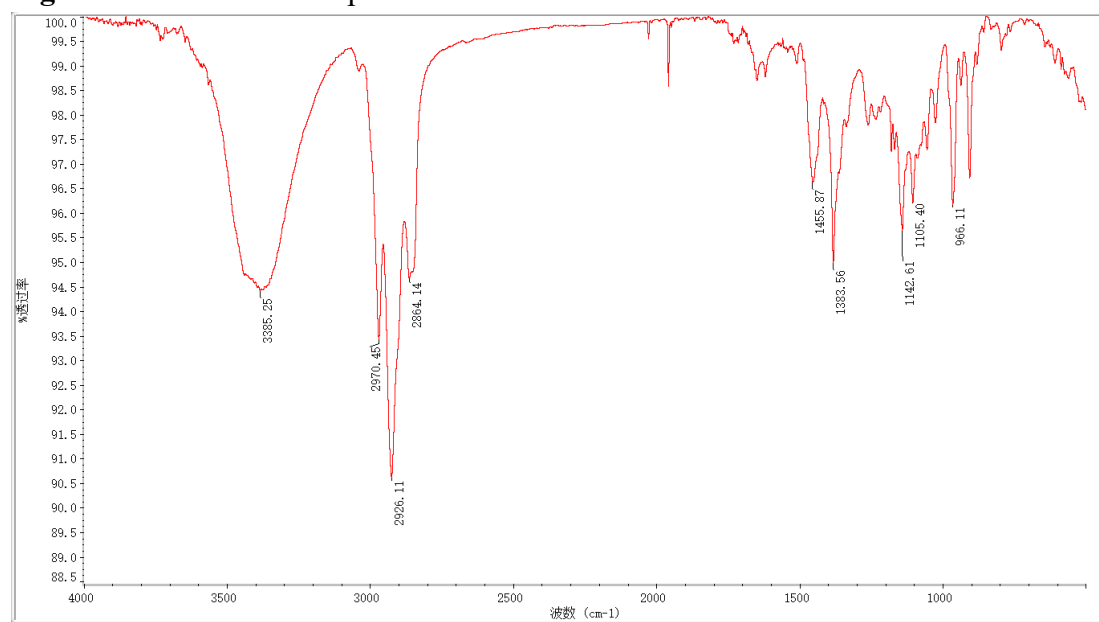

**Figure S84.** IR spectrum of **12**

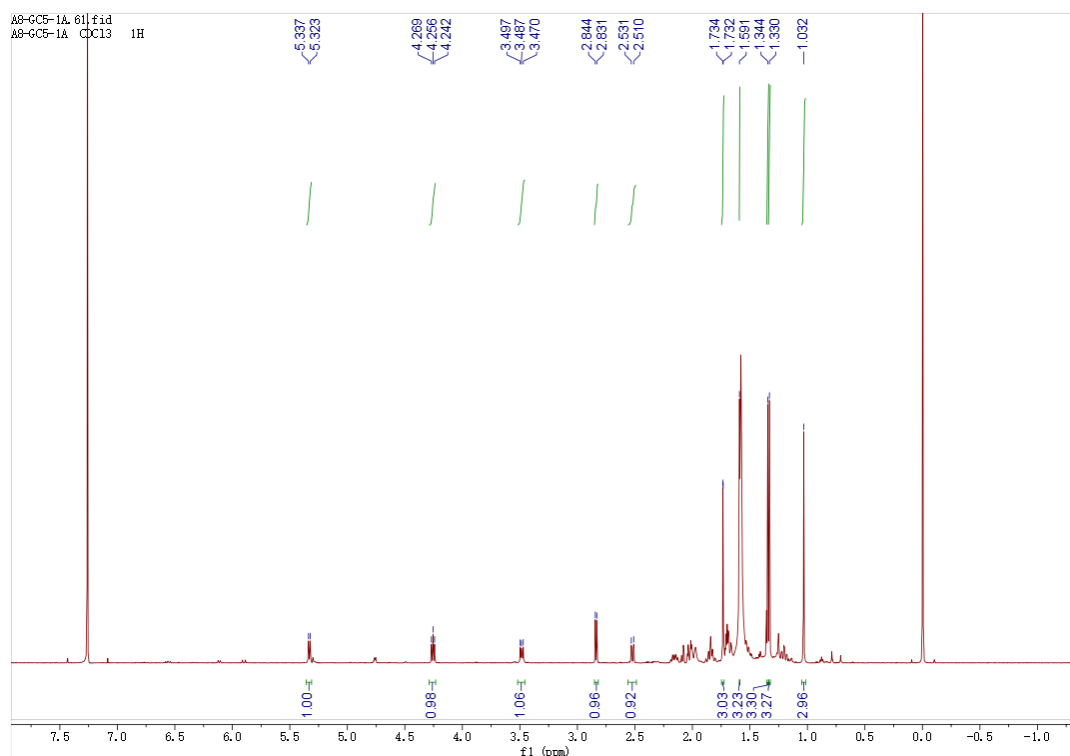

**Figure S85.**  $^1\text{H}$  NMR spectrum of **13** (600MHz,  $\text{CDCl}_3$ )

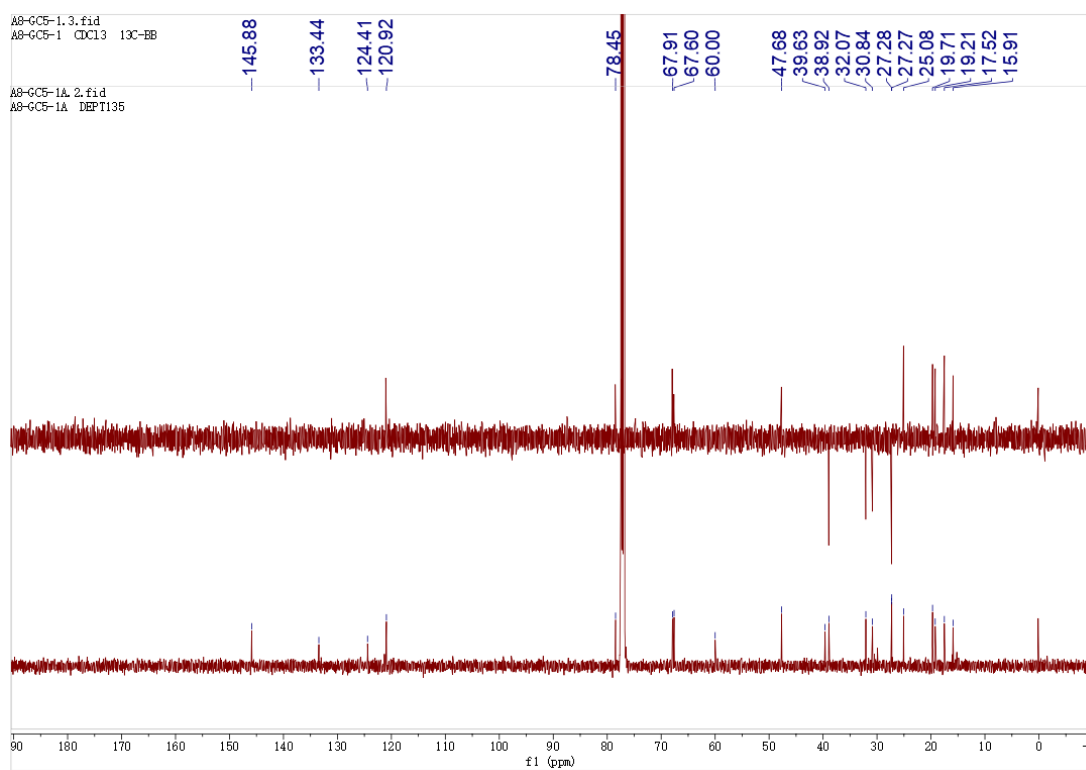

**Figure S86.**  $^{13}\text{C}$  NMR spectrum of **13** (125 MHz,  $\text{CDCl}_3$ )

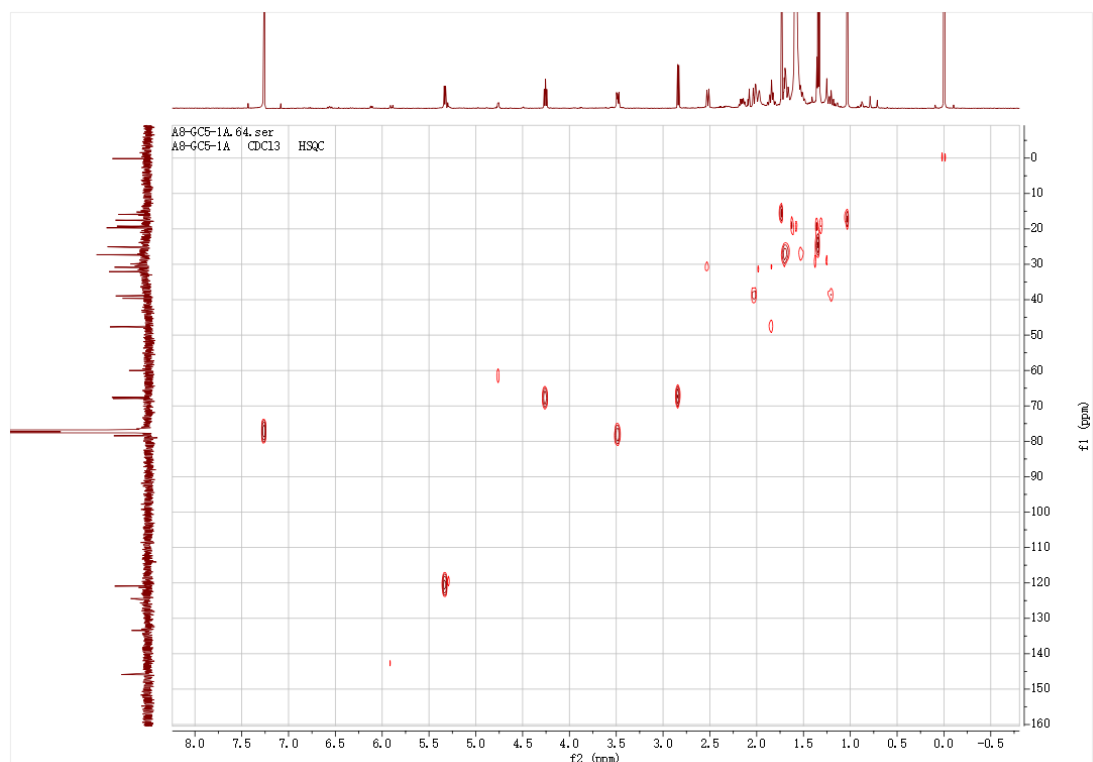

**Figure S87.** HSQC spectrum of **13** (600 MHz, CDCl<sub>3</sub>)

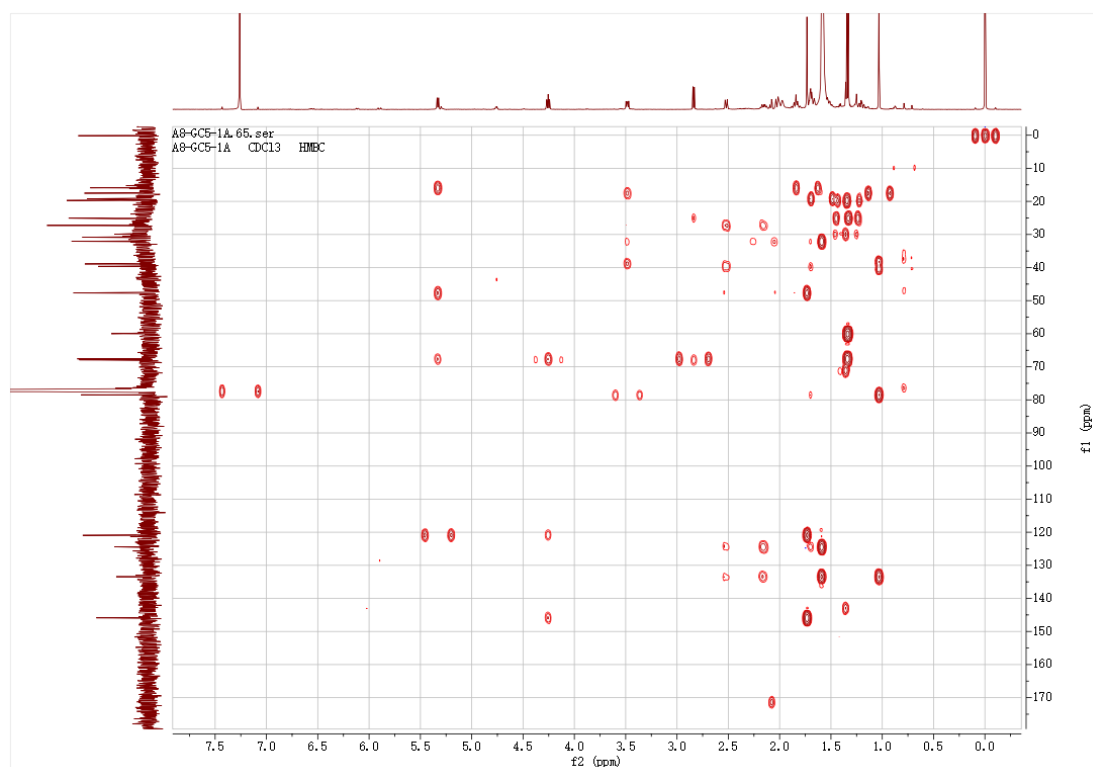

**Figure S88.** HMBC spectrum of **13** (600 MHz, CDCl<sub>3</sub>)



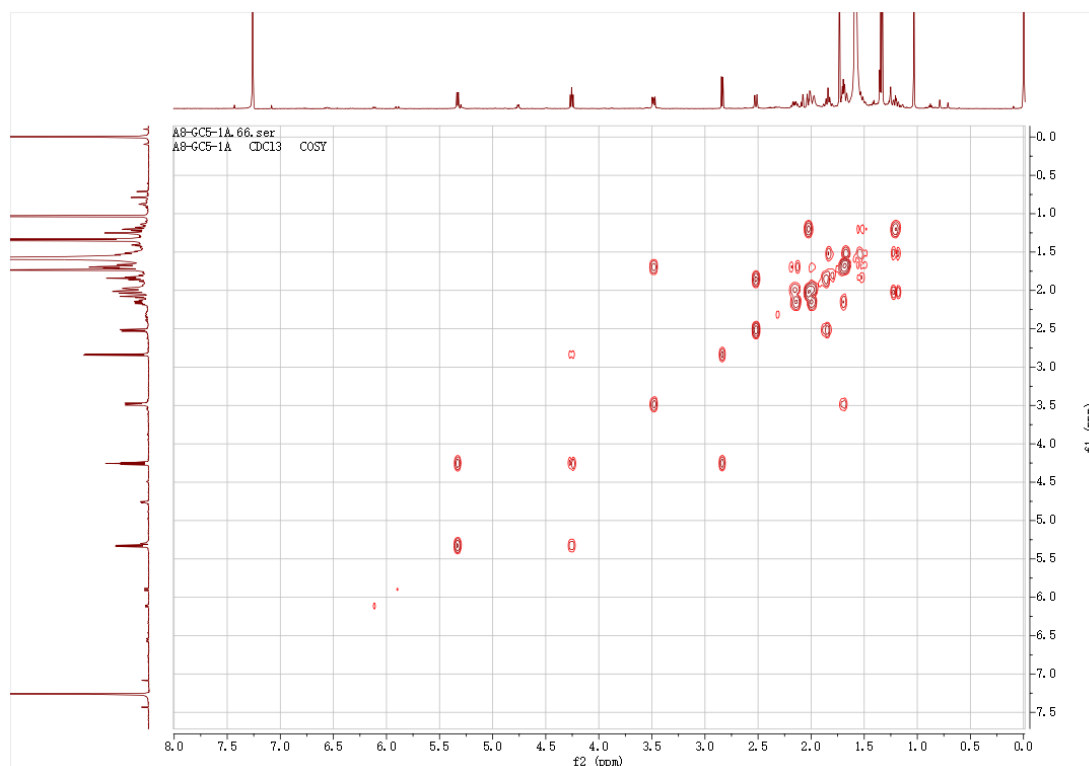

**Figure S89.**  $^1\text{H}$ - $^1\text{H}$  COSY spectrum of **13** (600 MHz,  $\text{CDCl}_3$ )

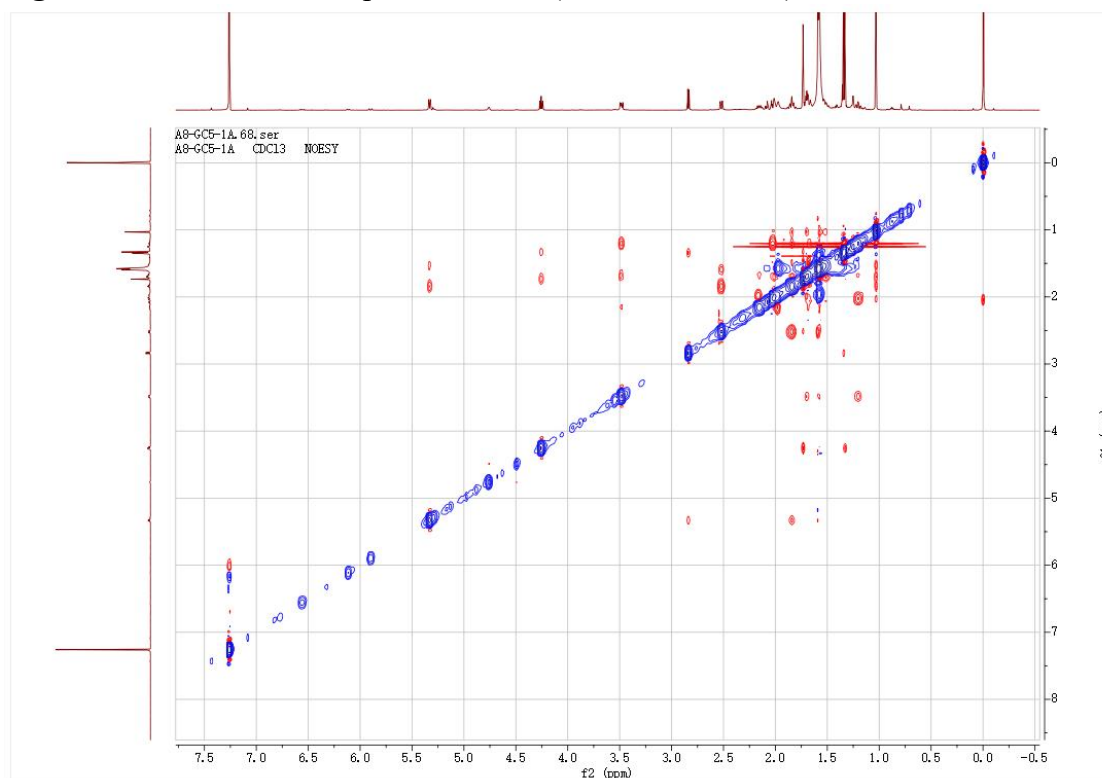

**Figure S90.** NOESY spectrum of **13** (600 MHz,  $\text{CDCl}_3$ )

EI202101749\_A8-GC5-1A -c1#14 RT: 2.68

T: + c EI Full ms [ 49.50-800.50]

m/z= 48-803

| m/z      | Intensity | Relative | Theo.<br>Mass | Delta<br>(mmu) | RDB<br>equiv. | Composition                                    |
|----------|-----------|----------|---------------|----------------|---------------|------------------------------------------------|
| 212.1546 | 1397829.0 | 4.66     | 212.1560      | -1.35          | 7.0           | C <sub>16</sub> H <sub>20</sub>                |
| 213.1626 | 2581159.0 | 8.60     | 213.1638      | -1.14          | 6.5           | C <sub>16</sub> H <sub>21</sub>                |
| 215.1426 | 1684101.0 | 5.61     | 215.1430      | -0.43          | 6.5           | C <sub>15</sub> H <sub>19</sub> O <sub>1</sub> |
| 218.1657 | 812947.0  | 2.71     | 218.1665      | -0.78          | 5.0           | C <sub>15</sub> H <sub>22</sub> O <sub>1</sub> |
| 229.1579 | 841138.0  | 2.80     | 229.1587      | -0.82          | 6.5           | C <sub>16</sub> H <sub>21</sub> O <sub>1</sub> |
| 230.1657 | 2084501.0 | 6.94     | 230.1665      | -0.82          | 6.0           | C <sub>16</sub> H <sub>22</sub> O <sub>1</sub> |
| 231.1729 | 1604021.0 | 5.34     | 231.1743      | -1.45          | 5.5           | C <sub>16</sub> H <sub>23</sub> O <sub>1</sub> |
| 244.1823 | 1308243.0 | 4.36     | 244.1822      | 0.10           | 6.0           | C <sub>17</sub> H <sub>24</sub> O <sub>1</sub> |
| 248.1773 | 1264526.0 | 4.21     | 248.1771      | 0.22           | 5.0           | C <sub>16</sub> H <sub>24</sub> O <sub>2</sub> |
| 249.1839 | 932739.0  | 3.11     | 249.1849      | -0.96          | 4.5           | C <sub>16</sub> H <sub>25</sub> O <sub>2</sub> |
| 259.1698 | 870855.0  | 2.90     | 259.1693      | 0.51           | 6.5           | C <sub>17</sub> H <sub>23</sub> O <sub>2</sub> |
| 269.1890 | 787152.0  | 2.62     | 269.1900      | -0.96          | 7.5           | C <sub>19</sub> H <sub>25</sub> O <sub>1</sub> |
| 284.2138 | 1668902.0 | 5.56     | 284.2135      | 0.32           | 7.0           | C <sub>20</sub> H <sub>28</sub> O <sub>1</sub> |
| 287.2004 | 1104993.0 | 3.68     | 287.2006      | -0.16          | 6.5           | C <sub>19</sub> H <sub>27</sub> O <sub>2</sub> |
| 302.2240 | 1388705.0 | 4.63     | 302.2240      | -0.06          | 6.0           | C <sub>20</sub> H <sub>30</sub> O <sub>2</sub> |
| 320.2347 | 1207871.0 | 4.02     | 320.2346      | 0.15           | 5.0           | C <sub>20</sub> H <sub>32</sub> O <sub>3</sub> |

Figure S91. HREIMS spectrum of 13

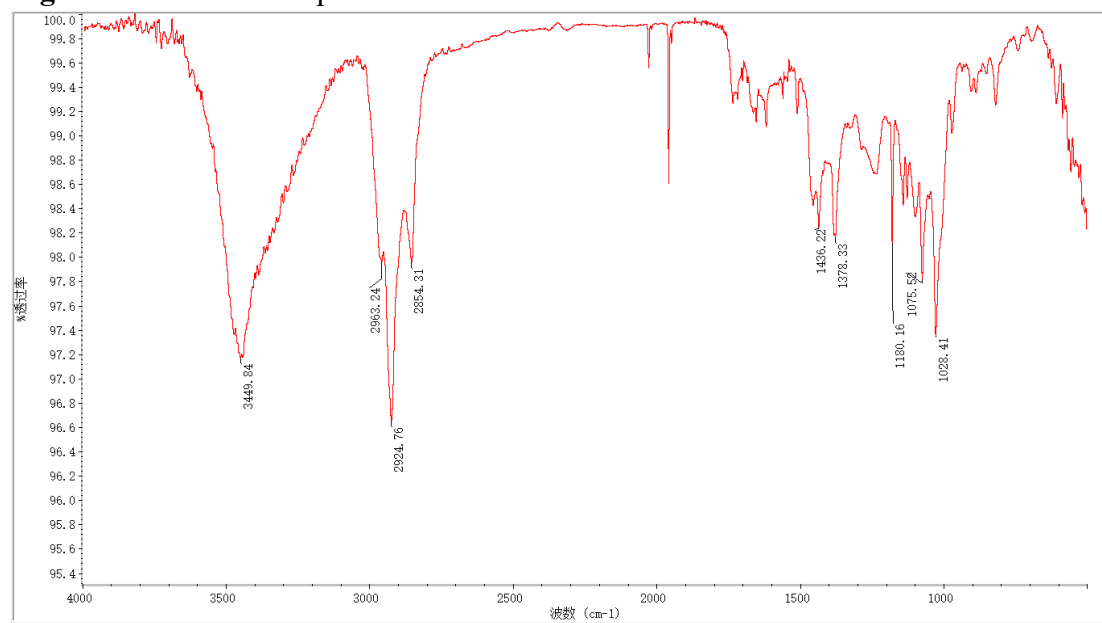

Figure S92. IR spectrum of 13

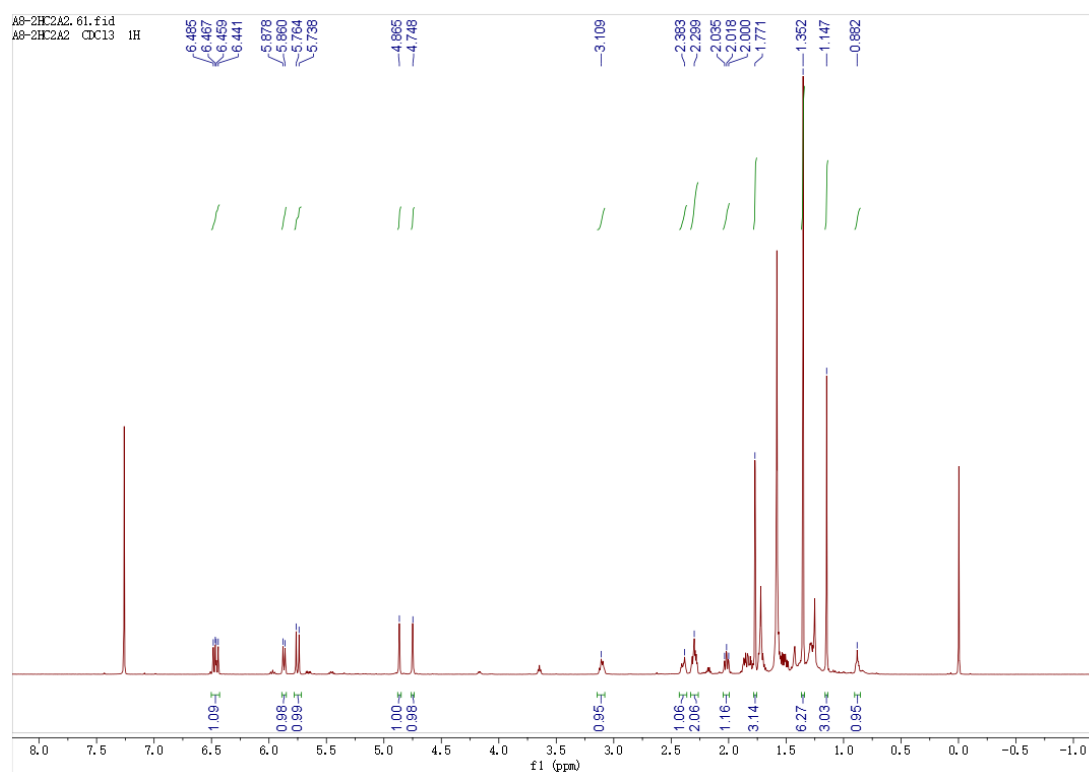

**Figure S93.**  $^1\text{H}$  NMR spectrum of **14** (600MHz,  $\text{CDCl}_3$ )

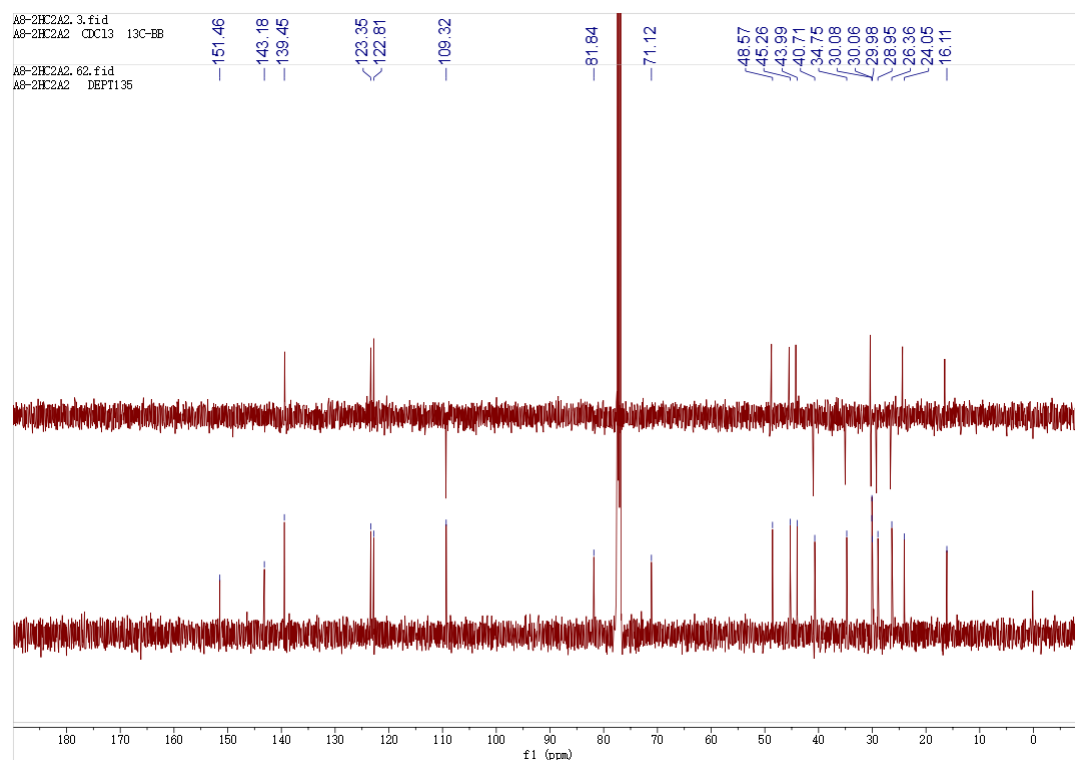

**Figure S94.**  $^{13}\text{C}$  NMR spectrum of **14** (125 MHz,  $\text{CDCl}_3$ )

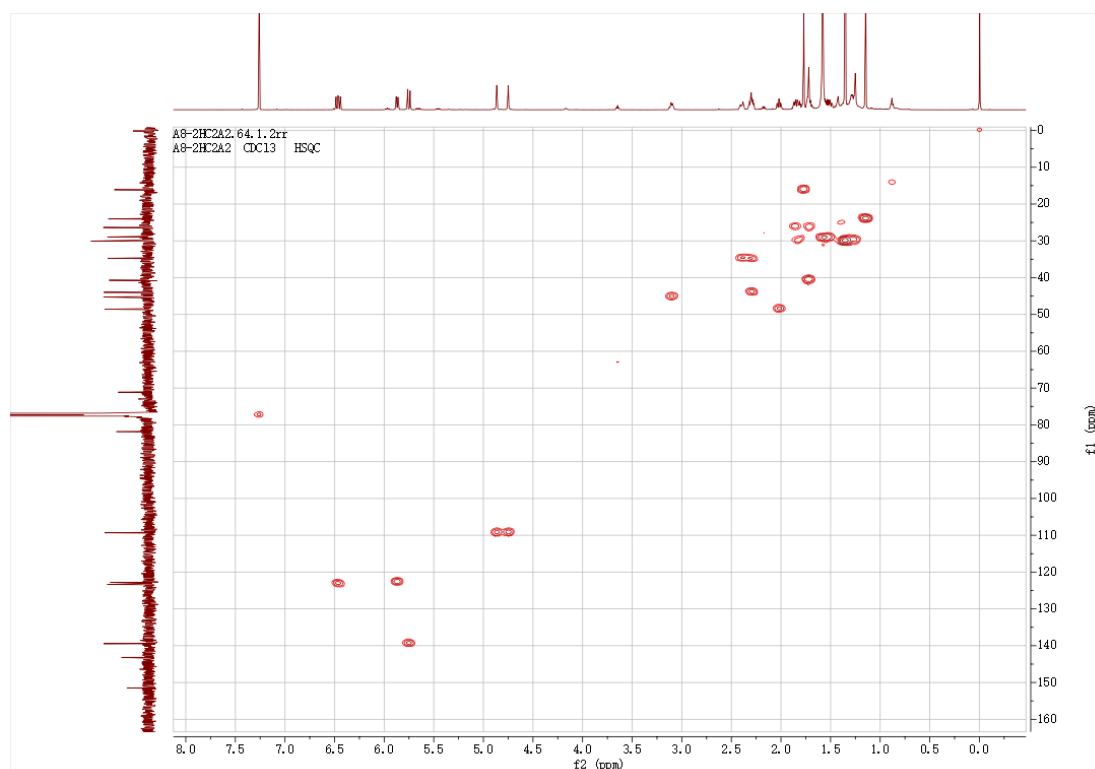

**Figure S95.** HSQC spectrum of **14** (600 MHz, CDCl<sub>3</sub>)

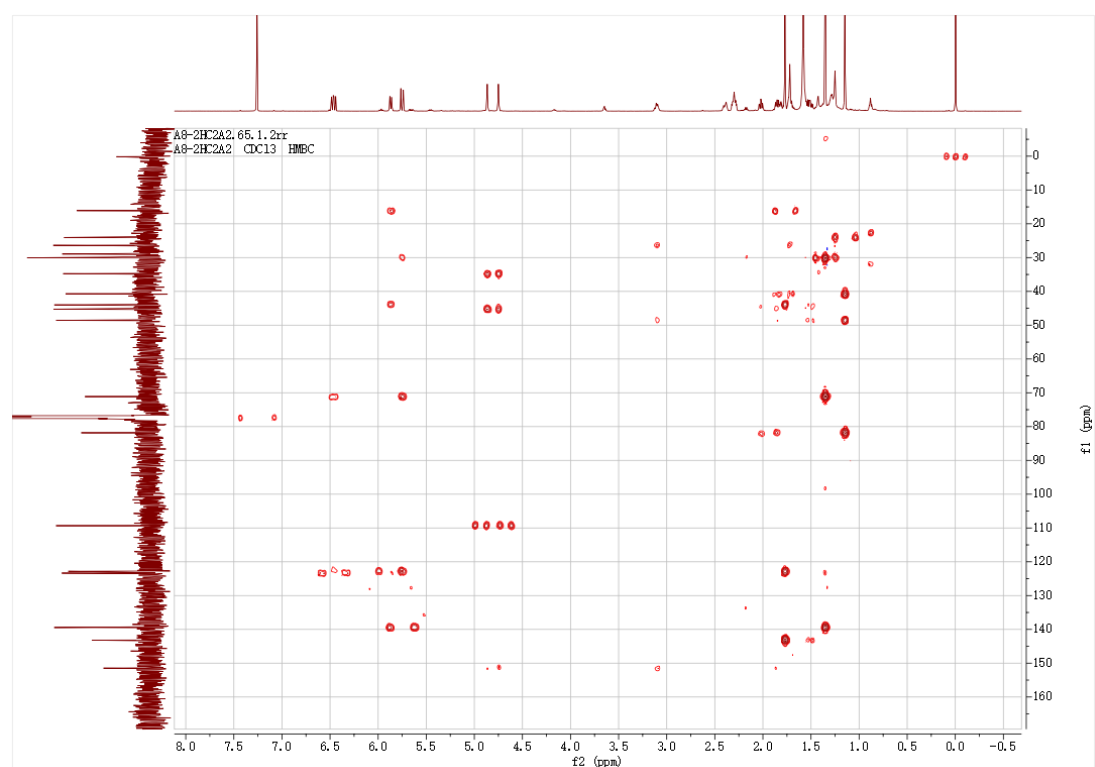

**Figure S96.** HMBC spectrum of **14** (600 MHz, CDCl<sub>3</sub>)

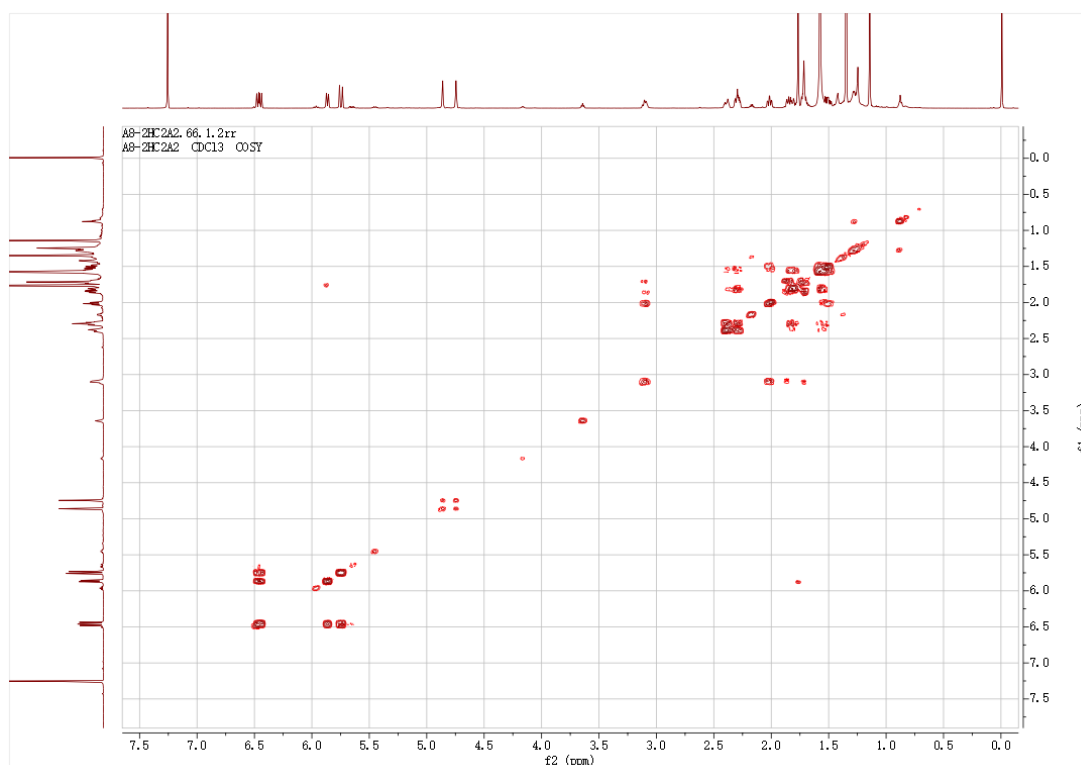

**Figure S97.**  $^1\text{H}$ - $^1\text{H}$  COSY spectrum of **14** (600 MHz,  $\text{CDCl}_3$ )

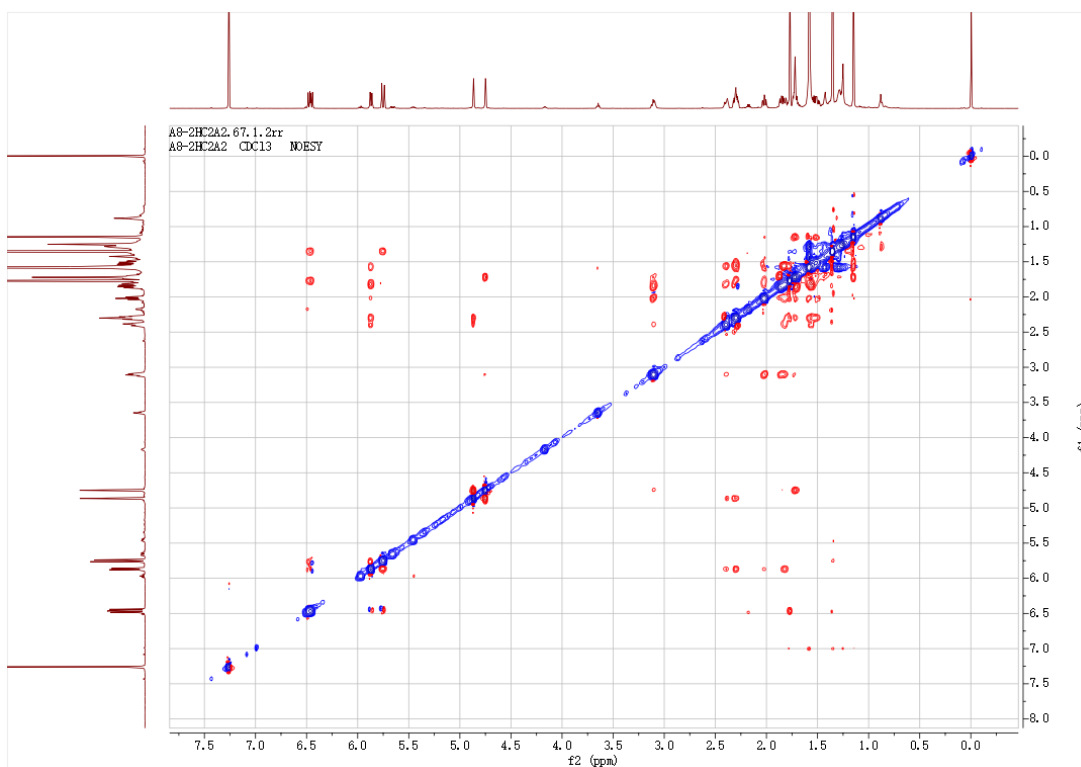

**Figure S98.** NOESY spectrum of **14** (600 MHz,  $\text{CDCl}_3$ )

EI202101755 A8-2HC2A2 -c1#11 RT: 2.07

T: + c EI Full ms [ 49.50-800.50]

m/z= 48-803

| m/z      | Intensity | Relative | Theo. Mass | Delta (mmu) | RDB equiv. | Composition                                    |
|----------|-----------|----------|------------|-------------|------------|------------------------------------------------|
| 215.1774 | 2748265.0 | 22.35    | 215.1794   | -2.05       | 5.5        | C <sub>16</sub> H <sub>23</sub>                |
| 217.1586 | 843208.0  | 6.86     | 217.1587   | -0.09       | 5.5        | C <sub>15</sub> H <sub>21</sub> O <sub>1</sub> |
| 218.1642 | 316370.0  | 2.57     | 218.1665   | -2.27       | 5.0        | C <sub>15</sub> H <sub>22</sub> O <sub>1</sub> |
| 225.1641 | 1429262.0 | 11.62    | 225.1638   | 0.31        | 7.5        | C <sub>17</sub> H <sub>21</sub>                |
| 226.1701 | 750871.0  | 6.11     | 226.1716   | -1.51       | 7.0        | C <sub>17</sub> H <sub>22</sub>                |
| 227.1793 | 1622788.0 | 13.20    | 227.1794   | -0.15       | 6.5        | C <sub>17</sub> H <sub>23</sub>                |
| 228.1868 | 6052541.0 | 49.22    | 228.1873   | -0.48       | 6.0        | C <sub>17</sub> H <sub>24</sub>                |
| 229.1587 | 621327.0  | 5.05     | 229.1587   | -0.02       | 6.5        | C <sub>16</sub> H <sub>21</sub> O <sub>1</sub> |
| 230.1654 | 554594.0  | 4.51     | 230.1665   | -1.12       | 6.0        | C <sub>16</sub> H <sub>22</sub> O <sub>1</sub> |
| 231.1738 | 837951.0  | 6.81     | 231.1743   | -0.59       | 5.5        | C <sub>16</sub> H <sub>23</sub> O <sub>1</sub> |
| 232.1801 | 288342.0  | 2.34     | 232.1822   | -2.02       | 5.0        | C <sub>16</sub> H <sub>24</sub> O <sub>1</sub> |
| 239.1790 | 399418.0  | 3.25     | 239.1794   | -0.44       | 7.5        | C <sub>18</sub> H <sub>23</sub>                |
| 240.1862 | 306836.0  | 2.50     | 240.1873   | -1.09       | 7.0        | C <sub>18</sub> H <sub>24</sub>                |
| 241.1586 | 317595.0  | 2.58     | 241.1587   | -0.08       | 7.5        | C <sub>17</sub> H <sub>21</sub> O <sub>1</sub> |
| 241.1948 | 353250.0  | 2.87     | 241.1951   | -0.29       | 6.5        | C <sub>18</sub> H <sub>25</sub>                |
| 243.1741 | 855220.0  | 6.96     | 243.1743   | -0.23       | 6.5        | C <sub>17</sub> H <sub>23</sub> O <sub>1</sub> |
| 243.2104 | 2031386.0 | 16.52    | 243.2107   | -0.32       | 5.5        | C <sub>18</sub> H <sub>27</sub>                |
| 244.1803 | 359733.0  | 2.93     | 244.1822   | -1.83       | 6.0        | C <sub>17</sub> H <sub>24</sub> O <sub>1</sub> |
| 245.1898 | 461657.0  | 3.75     | 245.1900   | -0.21       | 5.5        | C <sub>17</sub> H <sub>25</sub> O <sub>1</sub> |
| 246.1980 | 1533774.0 | 12.47    | 246.1978   | 0.14        | 5.0        | C <sub>17</sub> H <sub>26</sub> O <sub>1</sub> |
| 253.1955 | 2744070.0 | 22.32    | 253.1951   | 0.43        | 7.5        | C <sub>19</sub> H <sub>25</sub>                |
| 257.1899 | 333257.0  | 2.71     | 257.1900   | -0.09       | 6.5        | C <sub>18</sub> H <sub>25</sub> O <sub>1</sub> |
| 258.1976 | 279843.0  | 2.28     | 258.1978   | -0.21       | 6.0        | C <sub>18</sub> H <sub>26</sub> O <sub>1</sub> |
| 268.2187 | 1867822.0 | 15.19    | 268.2186   | 0.16        | 7.0        | C <sub>20</sub> H <sub>28</sub>                |
| 269.2236 | 699282.0  | 5.69     | 269.2264   | -2.74       | 6.5        | C <sub>20</sub> H <sub>29</sub>                |
| 271.2057 | 3967903.0 | 32.27    | 271.2056   | 0.08        | 6.5        | C <sub>19</sub> H <sub>27</sub> O <sub>1</sub> |
| 286.2289 | 8008206.0 | 65.13    | 286.2291   | -0.23       | 6.0        | C <sub>20</sub> H <sub>30</sub> O <sub>1</sub> |
| 289.2159 | 348483.0  | 2.83     | 289.2162   | -0.35       | 5.5        | C <sub>19</sub> H <sub>29</sub> O <sub>2</sub> |
| 304.2400 | 350254.0  | 2.85     | 304.2397   | 0.36        | 5.0        | C <sub>20</sub> H <sub>32</sub> O <sub>2</sub> |

Figure S99. HREIMS spectrum of **14**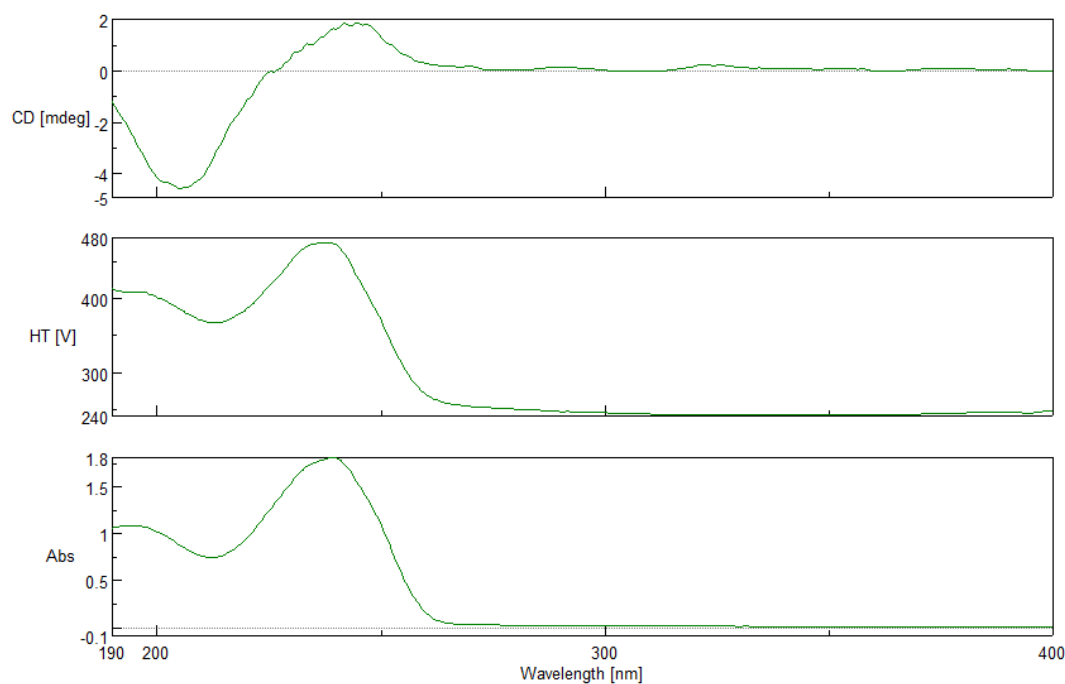Figure S100. UV and CD spectrum of **14**

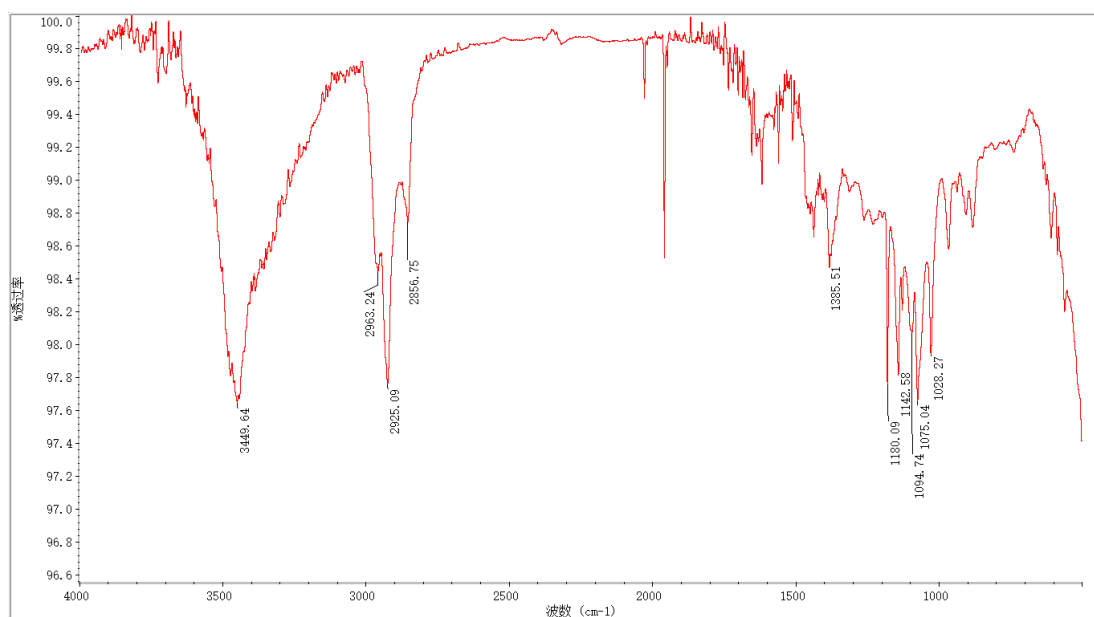

**Figure S101.** IR spectrum of **14**

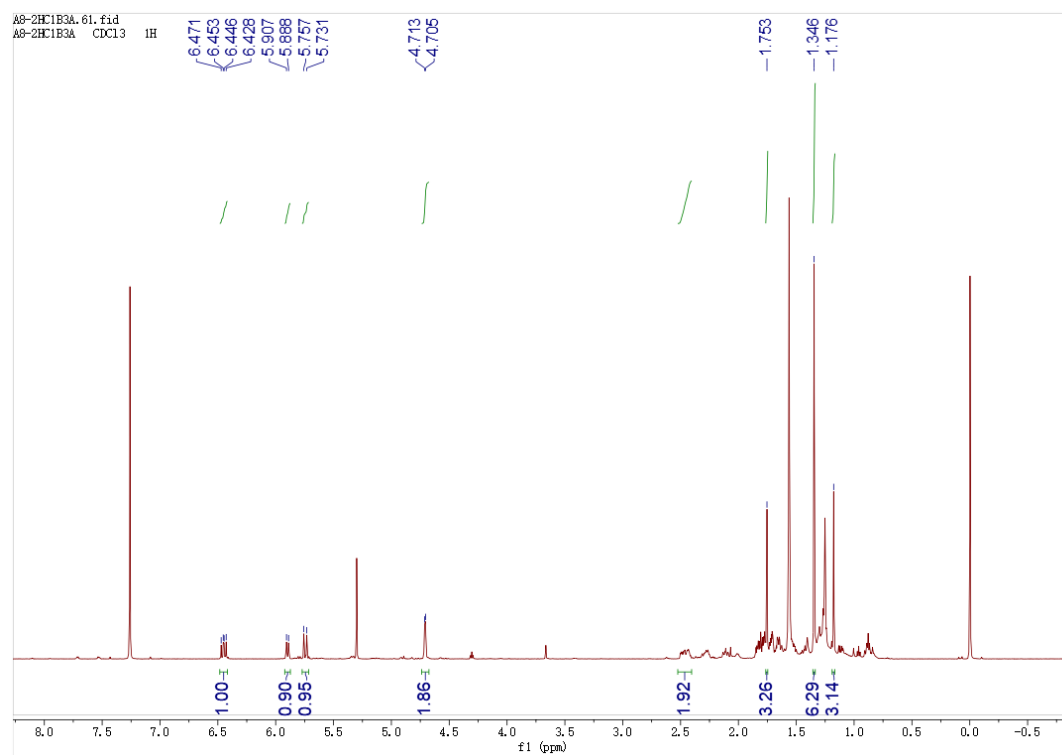

**Figure S102.** <sup>1</sup>H NMR spectrum of **15** (600MHz, CDCl<sub>3</sub>)





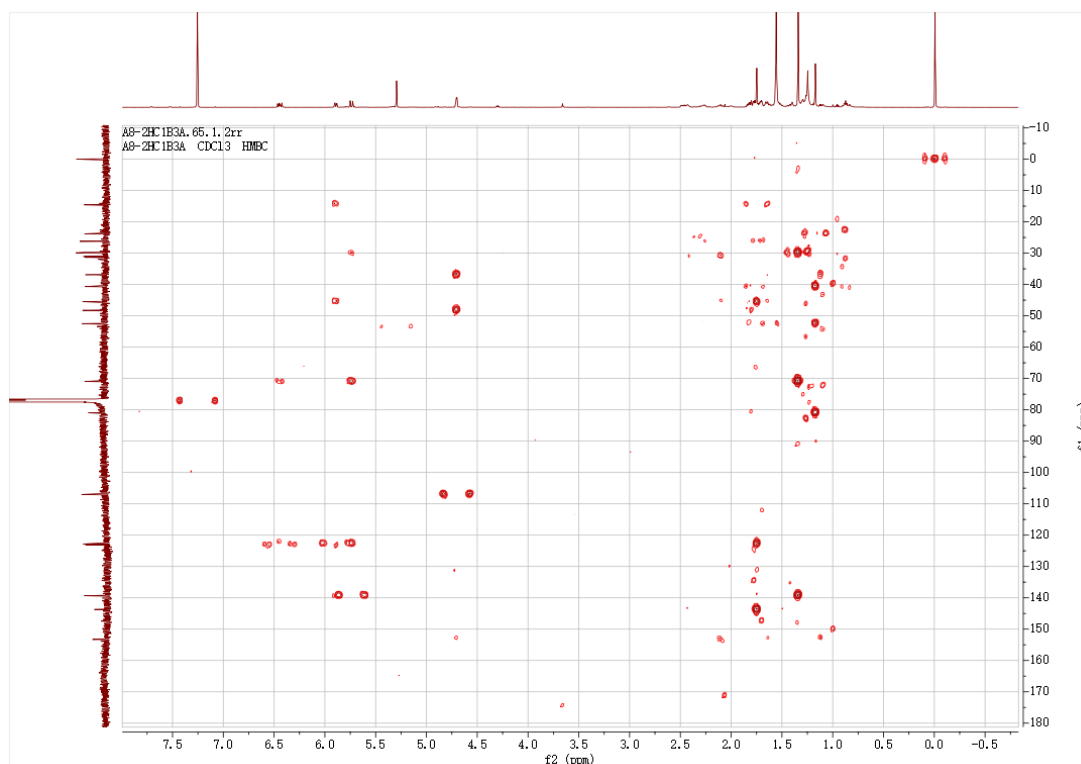

**Figure S105.** HMBC spectrum of **15** (600 MHz, CDCl<sub>3</sub>)

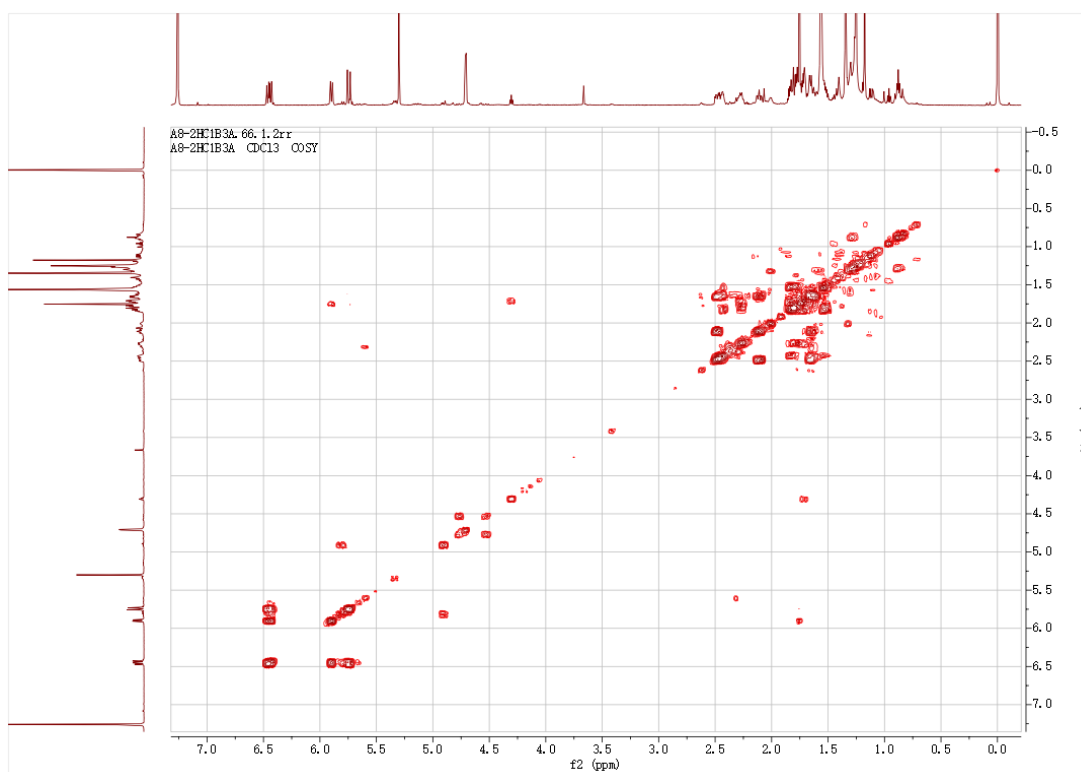

**Figure S106.** <sup>1</sup>H–<sup>1</sup>H COSY spectrum of **15** (600 MHz, CDCl<sub>3</sub>)

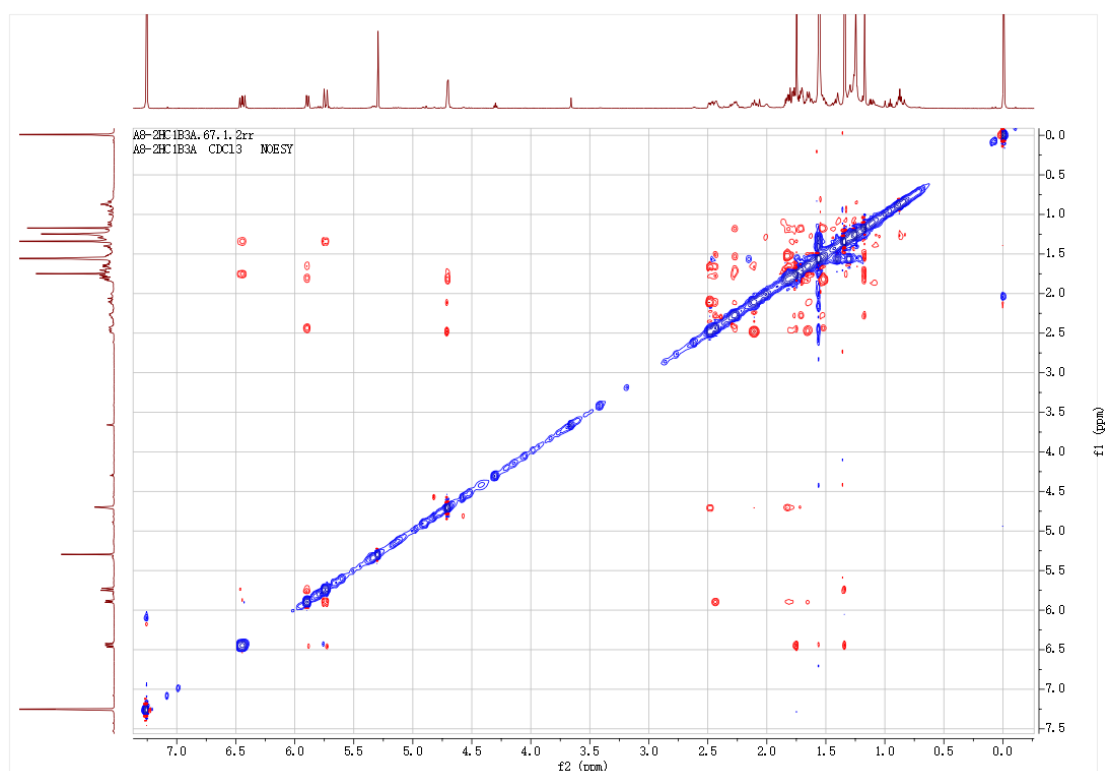

**Figure S107.** NOESY spectrum of **15** (600 MHz, CDCl<sub>3</sub>)

D:\data\2021\EI202101813\_A8-2HC1B3A -c1

10/21/2021 1:24:13 PM

EI202101813\_A8-2HC1B3A -c1#7 RT: 1.24

T: + c EI Full ms [ 49.50-800.50]

m/z= 48-803

| m/z      | Intensity | Relative | Theo.<br>Mass | Delta<br>(mmu) | RDB<br>equiv. | Composition                                    |
|----------|-----------|----------|---------------|----------------|---------------|------------------------------------------------|
| 199.1479 | 3644199.0 | 31.50    | 199.1481      | -0.23          | 6.5           | C <sub>15</sub> H <sub>19</sub>                |
| 200.1538 | 1192140.0 | 10.30    | 200.1560      | -2.18          | 6.0           | C <sub>15</sub> H <sub>20</sub>                |
| 201.1635 | 2498025.0 | 21.59    | 201.1638      | -0.23          | 5.5           | C <sub>15</sub> H <sub>21</sub>                |
| 204.1504 | 1388662.0 | 12.00    | 204.1509      | -0.44          | 5.0           | C <sub>14</sub> H <sub>20</sub> O <sub>1</sub> |
| 211.1467 | 1077776.0 | 9.32     | 211.1481      | -1.47          | 7.5           | C <sub>16</sub> H <sub>19</sub>                |
| 213.1630 | 3543084.0 | 30.63    | 213.1638      | -0.82          | 6.5           | C <sub>16</sub> H <sub>21</sub>                |
| 214.1705 | 4530516.0 | 39.16    | 214.1716      | -1.06          | 6.0           | C <sub>16</sub> H <sub>22</sub>                |
| 215.1779 | 2846127.0 | 24.60    | 215.1794      | -1.57          | 5.5           | C <sub>16</sub> H <sub>23</sub>                |
| 225.1640 | 1082919.0 | 9.36     | 225.1638      | 0.24           | 7.5           | C <sub>17</sub> H <sub>21</sub>                |
| 227.1796 | 1183173.0 | 10.23    | 227.1794      | 0.13           | 6.5           | C <sub>17</sub> H <sub>23</sub>                |
| 228.1871 | 1855571.0 | 16.04    | 228.1873      | -0.15          | 6.0           | C <sub>17</sub> H <sub>24</sub>                |
| 243.1738 | 961042.0  | 8.31     | 243.1743      | -0.59          | 6.5           | C <sub>17</sub> H <sub>23</sub> O <sub>1</sub> |
| 243.2101 | 3286915.0 | 28.41    | 243.2107      | -0.65          | 5.5           | C <sub>18</sub> H <sub>27</sub>                |
| 253.1949 | 2327920.0 | 20.12    | 253.1951      | -0.19          | 7.5           | C <sub>19</sub> H <sub>25</sub>                |
| 268.2187 | 1472032.0 | 12.72    | 268.2186      | 0.14           | 7.0           | C <sub>20</sub> H <sub>28</sub>                |
| 271.2054 | 4733635.0 | 40.92    | 271.2056      | -0.21          | 6.5           | C <sub>19</sub> H <sub>27</sub> O <sub>1</sub> |
| 286.2294 | 2905988.0 | 25.12    | 286.2291      | 0.28           | 6.0           | C <sub>20</sub> H <sub>30</sub> O <sub>1</sub> |
| 304.2402 | 1077830.0 | 9.32     | 304.2397      | 0.53           | 5.0           | C <sub>20</sub> H <sub>32</sub> O <sub>2</sub> |

**Figure S108.** HREIMS spectrum of **15**

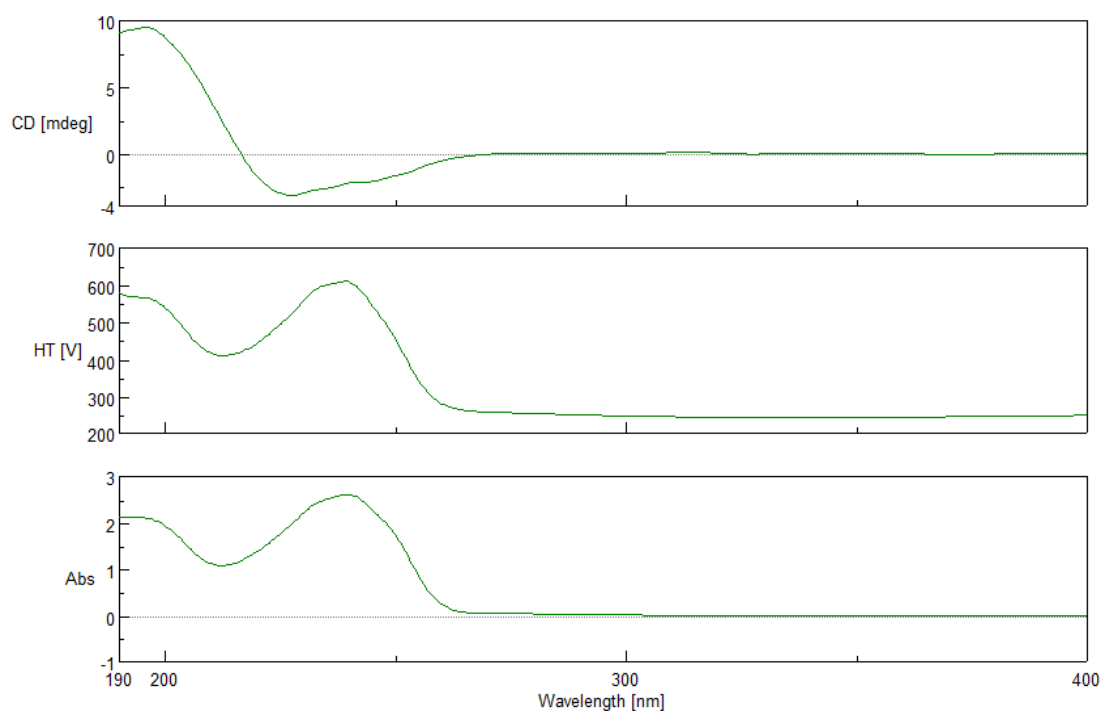

**Figure S109.** UV and CD spectrum of **15**

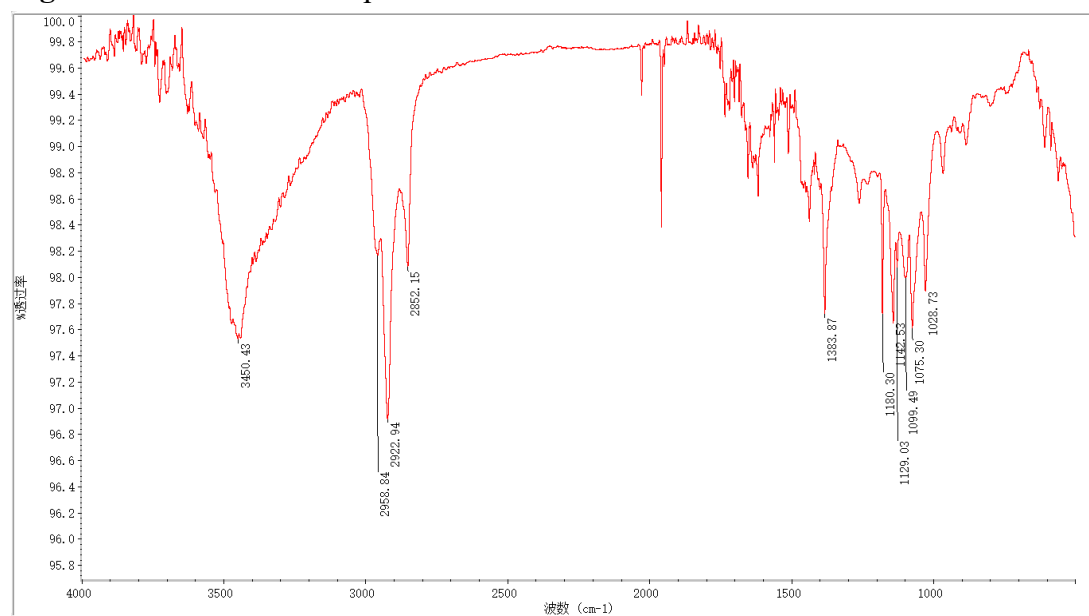

**Figure S110.** IR spectrum of **15**

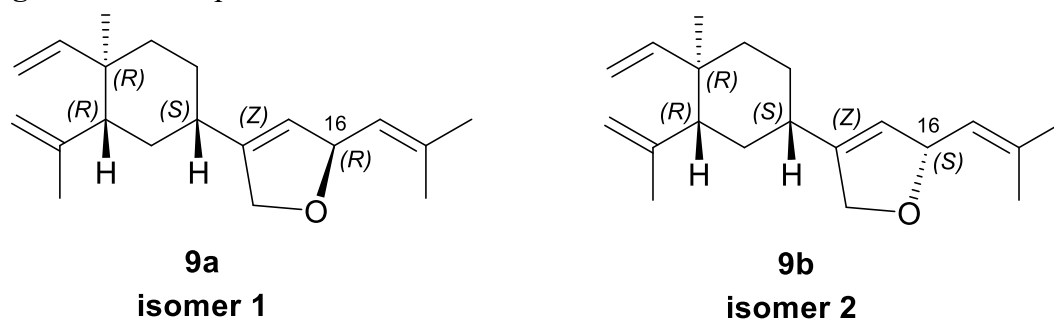

**Figure S111.** Structure of studied isomers of compound **9**

| Functional<br>mPVP91 |      | Solvent?<br>PCl | Basis Set<br>6-31+G(d,p) |            | Type of Data<br>Shielding Tensors |          |          |
|----------------------|------|-----------------|--------------------------|------------|-----------------------------------|----------|----------|
|                      |      | DP4+            | 99.83%                   | 0.17%      | -                                 | -        | -        |
| Nuclei               | sp2? | Experimental    | Isomer 1                 | Isomer 2   | Isomer 3                          | Isomer 4 | Isomer 5 |
| C                    |      | 39.9            | 153.2                    | 153.1      |                                   |          |          |
| C                    |      | 52.6            | 143.1                    | 143.0      |                                   |          |          |
| C                    | x    | 33.1            | 162.6                    | 161.8      |                                   |          |          |
| C                    |      | 37.2            | 156.5                    | 156.7      |                                   |          |          |
| C                    | x    | 27.2            | 167.9                    | 168.9      |                                   |          |          |
| C                    | x    | 39.7            | 160.3                    | 160.2      |                                   |          |          |
| C                    |      | 150.1           | 50.6                     | 50.5       |                                   |          |          |
| C                    |      | 147.5           | 50.6                     | 50.6       |                                   |          |          |
| C                    | x    | 112.4           | 84.2                     | 84.3       |                                   |          |          |
| C                    |      | 24.9            | 169.2                    | 169.1      |                                   |          |          |
| C                    | x    | 110.2           | 88.6                     | 88.5       |                                   |          |          |
| C                    |      | 16.7            | 176.44                   | 176.64     |                                   |          |          |
| C                    |      | 145.7           | 53.22                    | 53.38      |                                   |          |          |
| C                    |      | 120.9           | 75.26                    | 75.37      |                                   |          |          |
| C                    | x    | 75.3            | 121.71                   | 121.50     |                                   |          |          |
| C                    |      | 83.1            | 111.39                   | 111.22     |                                   |          |          |
| C                    |      | 125.7           | 72.28                    | 72.37      |                                   |          |          |
| C                    |      | 135.5           | 62.77                    | 62.64      |                                   |          |          |
| C                    |      | 26              | 169.22                   | 169.24     |                                   |          |          |
| C                    |      | 18.2            | 177.55                   | 177.55     |                                   |          |          |
|                      |      |                 |                          |            |                                   |          |          |
| H                    |      | 2.01            | 29.77                    | 29.79      |                                   |          |          |
| H                    | x    | 1.61            | 29.83                    | 30.09      |                                   |          |          |
| H                    | x    | 1.61            | 30.24                    | 30.20      |                                   |          |          |
| H                    |      | 2.1             | 29.50                    | 29.54      |                                   |          |          |
| H                    | x    | 1.68            | 30.2202172               | 29.9820828 |                                   |          |          |
| H                    | x    | 1.44            | 30.0807476               | 30.1060126 |                                   |          |          |
| H                    | x    | 1.46            | 30.1707753               | 30.1569978 |                                   |          |          |
| H                    | x    | 1.46            | 30.0517074               | 30.0419154 |                                   |          |          |
| H                    |      | 5.81            | 25.2314334               | 25.2541179 |                                   |          |          |
| H                    | x    | 4.58            | 26.3859087               | 26.4066554 |                                   |          |          |
| H                    | x    | 4.83            | 26.6772847               | 26.7058152 |                                   |          |          |
| H                    |      | 1.71            | 30.0896834               | 30.1114021 |                                   |          |          |
| H                    |      | 1.71            | 29.894635                | 29.9109793 |                                   |          |          |
| H                    |      | 1.71            | 29.8363177               | 29.8413915 |                                   |          |          |
| H                    | x    | 4.9             | 26.4957979               | 26.4920136 |                                   |          |          |
| H                    | x    | 4.9             | 26.5262444               | 26.5121271 |                                   |          |          |
| H                    |      | 1.01            | 31.3017912               | 31.2775949 |                                   |          |          |
| H                    |      | 1.01            | 30.1543136               | 30.1677567 |                                   |          |          |
| H                    |      | 1.01            | 30.5443112               | 30.5417124 |                                   |          |          |
| H                    |      | 5.31            | 26.1803821               | 26.1739778 |                                   |          |          |
| H                    | x    | 4.54            | 26.8569364               | 27.1196528 |                                   |          |          |
| H                    | x    | 4.64            | 27.1185903               | 26.8802879 |                                   |          |          |
| H                    |      | 5.5             | 26.1423184               | 26.1429093 |                                   |          |          |
| H                    |      | 5.15            | 26.3244063               | 26.3122161 |                                   |          |          |
| H                    |      | 1.73            | 30.0380179               | 30.041951  |                                   |          |          |
| H                    |      | 1.73            | 30.0194962               | 30.174225  |                                   |          |          |
| H                    |      | 1.73            | 30.1830762               | 30.0170812 |                                   |          |          |
| H                    |      | 1.73            | 30.023883                | 30.3550914 |                                   |          |          |
| H                    |      | 1.73            | 30.427398                | 29.4801701 |                                   |          |          |
| H                    |      | 1.73            | 29.8146288               | 30.4130154 |                                   |          |          |

**Figure S112.** Averaged isotropic magnetic shielding constants ( $\sigma$ ) of studied isomers and experimental  $^1\text{H}$  and  $^{13}\text{C}$  data of **9**

| Functional       | Solvent?                     |                              | Basis Set   |          | Type of Data      |          |
|------------------|------------------------------|------------------------------|-------------|----------|-------------------|----------|
| mPw1Pw91         | PCM                          |                              | 6-31+G(d,p) |          | Shielding Tensors |          |
|                  | Isomer 1                     | Isomer 2                     | Isomer 3    | Isomer 4 | Isomer 5          | Isomer 6 |
| sDP4+ (H data)   | <div><div></div>42.51%</div> | <div><div></div>57.49%</div> | —           | —        | —                 | —        |
| sDP4+ (C data)   | <div><div></div>56.15%</div> | <div><div></div>43.85%</div> | —           | —        | —                 | —        |
| sDP4+ (all data) | <div><div></div>48.63%</div> | <div><div></div>51.37%</div> | —           | —        | —                 | —        |
| uDP4+ (H data)   | <div><div></div>99.86%</div> | <div><div></div>0.14%</div>  | —           | —        | —                 | —        |
| uDP4+ (C data)   | <div><div></div>46.34%</div> | <div><div></div>53.66%</div> | —           | —        | —                 | —        |
| uDP4+ (all data) | <div><div></div>99.84%</div> | <div><div></div>0.16%</div>  | —           | —        | —                 | —        |
| DP4+ (H data)    | <div><div></div>99.81%</div> | <div><div></div>0.19%</div>  | —           | —        | —                 | —        |
| DP4+ (C data)    | <div><div></div>52.51%</div> | <div><div></div>47.49%</div> | —           | —        | —                 | —        |
| DP4+ (all data)  | <div><div></div>99.83%</div> | <div><div></div>0.17%</div>  | —           | —        | —                 | —        |

**Figure S113.** DP4+ results obtained using experimental  $^1\text{H}$  and  $^{13}\text{C}$  data of compound **9** versus isomers **9a** and **9b**

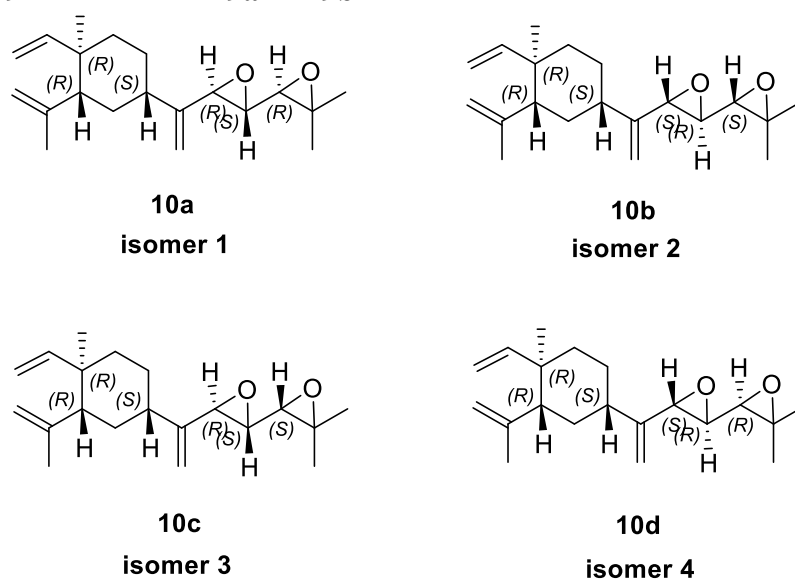

**Figure S114.** Structure of studied isomers of compound **10**

| Functional |      | Solvent?     |          | Basis Set   |          | Type of Data      |          |
|------------|------|--------------|----------|-------------|----------|-------------------|----------|
| mPW1PW91   |      | PCM          |          | 6-31+G(d,p) |          | Shielding Tensors |          |
|            |      | DP4+         | 0.00%    | 0.00%       | 0.00%    | 100.00%           | -        |
| Nuclei     | sp2? | experimental | Isomer 1 | Isomer 2    | Isomer 3 | Isomer 4          | Isomer 5 |
| C          |      | 39.8         | 153.2    | 153.2       | 153.0    | 153.3             |          |
| C          |      | 52.8         | 142.7    | 143.0       | 142.8    | 142.6             |          |
| C          | x    | 33.9         | 161.3    | 161.7       | 160.8    | 161.5             |          |
| C          |      | 41.1         | 150.3    | 150.7       | 150.4    | 151.1             |          |
| C          | x    | 27.1         | 168.7    | 168.6       | 169.2    | 167.7             |          |
| C          | x    | 39.8         | 160.2    | 160.4       | 160.5    | 160.3             |          |
| C          |      | 150.1        | 50.6     | 50.7        | 50.5     | 50.6              |          |
| C          |      | 147.4        | 50.5     | 50.2        | 50.4     | 50.6              |          |
| C          | x    | 110.3        | 88.5     | 88.5        | 88.6     | 88.7              |          |
| C          | x    | 112.4        | 84.3     | 84.6        | 84.4     | 84.3              |          |
| C          |      | 16.7         | 176.1    | 176.6       | 176.5    | 176.2             |          |
| C          |      | 25           | 169.26   | 168.40      | 168.31   | 169.14            |          |
| C          |      | 149.2        | 48.95    | 49.01       | 48.77    | 48.48             |          |
| C          | x    | 109.4        | 88.10    | 88.55       | 88.69    | 88.13             |          |
| C          |      | 56           | 140.54   | 140.28      | 139.04   | 138.60            |          |
| C          |      | 58.5         | 134.21   | 133.95      | 135.71   | 135.28            |          |
| C          |      | 63           | 132.43   | 132.44      | 134.01   | 134.51            |          |
| C          |      | 58.6         | 137.30   | 137.33      | 136.13   | 136.21            |          |
| C          |      | 24.7         | 171.51   | 171.52      | 171.89   | 171.77            |          |
| C          |      | 19.7         | 176.09   | 176.09      | 176.60   | 176.57            |          |

|   |   |      |            |            |            |            |  |
|---|---|------|------------|------------|------------|------------|--|
| H |   | 2.02 | 29.78      | 29.80      | 29.83      | 29.81      |  |
| H | x | 1.6  | 29.98      | 29.81      | 29.92      | 29.81      |  |
| H | x | 1.53 | 30.16      | 30.26      | 30.18      | 30.27      |  |
| H |   | 1.99 | 29.5340503 | 29.517696  | 29.5956355 | 29.6243786 |  |
| H | x | 1.62 | 29.7831772 | 29.9978599 | 29.7877729 | 29.9591575 |  |
| H | x | 1.5  | 30.2143417 | 30.0858343 | 30.1919774 | 30.0895766 |  |
| H | x | 1.48 | 30.1046551 | 30.1281622 | 30.1176191 | 30.1096067 |  |
| H | x | 1.48 | 29.9937712 | 30.0083197 | 29.9991686 | 30.0194794 |  |
| H |   | 5.81 | 25.2271971 | 25.2583384 | 25.2592416 | 25.2241271 |  |
| H | x | 4.9  | 26.4846061 | 26.4854008 | 26.4922313 | 26.4890081 |  |
| H | x | 4.9  | 26.4944741 | 26.5012281 | 26.5043046 | 26.5027924 |  |
| H | x | 4.83 | 26.3857173 | 26.3608126 | 26.3667446 | 26.3900452 |  |
| H | x | 4.57 | 26.6718796 | 26.6631036 | 26.6368418 | 26.673243  |  |
| H |   | 1.01 | 31.2459623 | 29.8978105 | 29.8906625 | 31.2651856 |  |
| H |   | 1.01 | 30.1154923 | 29.8163244 | 29.818158  | 30.0740645 |  |
| H |   | 1.01 | 30.5278597 | 30.0877662 | 30.092478  | 30.528799  |  |
| H |   | 1.71 | 30.0889904 | 31.2842685 | 31.2837359 | 30.086878  |  |
| H |   | 1.71 | 29.8894967 | 30.145295  | 30.0930534 | 29.8766822 |  |
| H |   | 1.71 | 29.838201  | 30.4981115 | 30.4880025 | 29.8909581 |  |
| H | x | 5.09 | 26.392703  | 26.3902534 | 26.4149611 | 26.3753123 |  |
| H | x | 4.95 | 26.5050457 | 26.5294215 | 26.5164921 | 26.4797489 |  |
| H |   | 3.31 | 28.4239683 | 28.4298219 | 28.2685267 | 28.2544793 |  |
| H |   | 2.73 | 29.3437228 | 29.3441615 | 29.0729206 | 28.9523859 |  |
| H |   | 2.63 | 29.4835126 | 29.4809384 | 29.0557675 | 28.9546145 |  |
| H |   | 1.35 | 30.2351614 | 30.24241   | 30.2165028 | 30.1538297 |  |
| H |   | 1.35 | 31.0853627 | 30.161786  | 30.1429085 | 30.2238291 |  |
| H |   | 1.35 | 30.1598604 | 31.091115  | 31.0473772 | 31.0521698 |  |
| H |   | 1.39 | 30.1808229 | 30.3462962 | 30.2116177 | 30.3701416 |  |
| H |   | 1.39 | 30.8349274 | 30.8392735 | 30.3502838 | 30.2137848 |  |
| H |   | 1.39 | 30.3443156 | 30.1821691 | 30.7772859 | 30.7714605 |  |

**Figure S115.** Averaged isotropic magnetic shielding constants ( $\sigma$ ) of studied isomers and experimental  $^1\text{H}$  and  $^{13}\text{C}$  data of **10**

| Functional       | Solvent?                     |                              | Basis Set                    |                               | Type of Data      |          |
|------------------|------------------------------|------------------------------|------------------------------|-------------------------------|-------------------|----------|
| mPW1PW91         | PCM                          |                              | 6-31+G(d,p)                  |                               | Shielding Tensors |          |
|                  | Isomer 1                     | Isomer 2                     | Isomer 3                     | Isomer 4                      | Isomer 5          | Isomer 6 |
| sDP4+ (H data)   | <div><div></div>0.01%</div>  | <div><div></div>0.00%</div>  | <div><div></div>0.00%</div>  | <div><div></div>99.99%</div>  | –                 | –        |
| sDP4+ (C data)   | <div><div></div>45.05%</div> | <div><div></div>19.28%</div> | <div><div></div>6.69%</div>  | <div><div></div>28.98%</div>  | –                 | –        |
| sDP4+ (all data) | <div><div></div>0.01%</div>  | <div><div></div>0.00%</div>  | <div><div></div>0.00%</div>  | <div><div></div>99.99%</div>  | –                 | –        |
| uDP4+ (H data)   | <div><div></div>0.03%</div>  | <div><div></div>0.00%</div>  | <div><div></div>0.00%</div>  | <div><div></div>99.97%</div>  | –                 | –        |
| uDP4+ (C data)   | <div><div></div>15.75%</div> | <div><div></div>27.27%</div> | <div><div></div>20.23%</div> | <div><div></div>36.76%</div>  | –                 | –        |
| uDP4+ (all data) | <div><div></div>0.01%</div>  | <div><div></div>0.00%</div>  | <div><div></div>0.00%</div>  | <div><div></div>99.99%</div>  | –                 | –        |
| DP4+ (H data)    | <div><div></div>0.00%</div>  | <div><div></div>0.00%</div>  | <div><div></div>0.00%</div>  | <div><div></div>100.00%</div> | –                 | –        |
| DP4+ (C data)    | <div><div></div>29.13%</div> | <div><div></div>21.59%</div> | <div><div></div>5.55%</div>  | <div><div></div>43.73%</div>  | –                 | –        |
| DP4+ (all data)  | <div><div></div>0.00%</div>  | <div><div></div>0.00%</div>  | <div><div></div>0.00%</div>  | <div><div></div>100.00%</div> | –                 | –        |

**Figure S116.** DP4+ results obtained using experimental  $^1\text{H}$  and  $^{13}\text{C}$  data of compound **10** versus isomers **10a**, **10b**, **10c**, **10d**
